# Supplementary material for: High TWIST1 mRNA expression is associated with poor prognosis in lymph node-negative and estrogen receptor-positive human breast cancer and is co-expressed with stromal as well as ECM related genes
Source: Breast Cancer Res. 2012 Sep 11;14(5):R123. doi: 10.1186/bcr3317 (PMC4053101; doi:10.1186/bcr3317)
Supplement: Additional file 3 — Tables S9-S15. Table S9A & B: TWIST1 co-expressed genes measured on Affymetrix U133A gene-chips in LNN/ER-positive patients. Table S10: Significant pathways predicted from KEGG database in LNN/ER-positive patients. Table S11: Gene ontology enrichment terms from TWIST1 co-regulated genes based on their biological processes and cellular components. Table S12A & B: TWIST1 co-expressed genes measured on Affymetrix U133A gene-chips in LNN/ER-negative patients. Table S13: Significant pathways predicted from KEGG database in LNN/ER-negative patients. Table S14: Significant pathways predicted from KEGG database in all LNN patients (both ER-positive and ER-negative combined). Table S15: Correlation of TWIST1 expression with known EMT markers measured on Affymetrix array in LNN/ER-positive samples (n = 221). [file bcr3317-S3.XLSX]

## Sheet: Table S9A & B
									Table S9A & B: TWIST1 co-expressed genes measured on Affymetrix U133A gene-chips in LNN/ER-positive patients
	Supplementary Table7A: TWIST1positively co-expressed genes on Affymetric U133A gene-chip								A: Positively co-expressed genes							B: Negatively co-expressed genes
	Twist1 probe	Gene-probe on array	Gene name	Rs	P-val	FDR P-val			TWIST1 probe	Gene-probe on array	Gene name	Rs	FDR* < 5%			TWIST1 probe	Gene-probe on array	Gene name	Rs	FDR* < 5%
	213943_at	219489_s_at	NXN	0.595083	3.25e-12				213943_at	219489_s_at	NXN	0.595083	8.17414e-10			213943_at	209339_at	SIAH2	-0.432831	2.5843e-09
	213943_at	213891_s_at	TCF4	0.582506	3.25e-12				213943_at	213891_s_at	TCF4	0.582506	8.17414e-10			213943_at	217860_at	LOC732160 / NDUFA10	-0.430433	3.11943e-09
	213943_at	212813_at	JAM3	0.580634	3.25e-12				213943_at	212813_at	JAM3	0.580634	8.17414e-10			213943_at	217811_at	SELT	-0.43029	3.11943e-09
	213943_at	206580_s_at	EFEMP2	0.554517	3.25e-12				213943_at	206580_s_at	EFEMP2	0.554517	8.17414e-10			213943_at	221255_s_at	TMEM93	-0.427991	3.7799e-09
	213943_at	205880_at	PRKD1	0.55344	3.25e-12				213943_at	205880_at	PRKD1	0.55344	8.17414e-10			213943_at	201583_s_at	SEC23B	-0.420884	6.97628e-09
	213943_at	202202_s_at	LAMA4	0.553373	3.25e-12				213943_at	202202_s_at	LAMA4	0.553373	8.17414e-10			213943_at	209367_at	STXBP2	-0.420241	7.41245e-09
	213943_at	204457_s_at	GAS1	0.549158	3.25e-12				213943_at	204457_s_at	GAS1	0.549158	8.17414e-10			213943_at	200670_at	XBP1	-0.407828	2.43774e-08
	213943_at	207480_s_at	MEIS2	0.543817	3.25e-12				213943_at	207480_s_at	MEIS2	0.543817	8.17414e-10			213943_at	218122_s_at	SENP2	-0.406042	2.79979e-08
	213943_at	203131_at	PDGFRA	0.541906	3.25e-12				213943_at	203131_at	PDGFRA	0.541906	8.17414e-10			213943_at	209092_s_at	GLOD4	-0.405284	3.0144e-08
	213943_at	202237_at	NNMT	0.534337	3.25e-12				213943_at	202237_at	NNMT	0.534337	8.17414e-10			213943_at	212442_s_at	LASS6	-0.401048	4.34356e-08
	213943_at	209550_at	NDN	0.526772	3.25e-12				213943_at	209550_at	NDN	0.526772	8.17414e-10			213943_at	212770_at	TLE3	-0.394989	7.7404e-08
	213943_at	205407_at	RECK	0.52438	3.25e-12				213943_at	205407_at	RECK	0.52438	8.17414e-10			213943_at	65591_at	WDR48	-0.39478	7.7404e-08
	213943_at	201215_at	PLS3	0.51495	3.25e-12				213943_at	201215_at	PLS3	0.51495	8.17414e-10			213943_at	202790_at	CLDN7	-0.394353	8.08648e-08
	213943_at	37408_at	MRC2	0.508881	3.25e-12				213943_at	37408_at	MRC2	0.508881	8.17414e-10			213943_at	202593_s_at	GDE1	-0.393907	8.36293e-08
	213943_at	209496_at	RARRES2	0.505351	3.25e-12				213943_at	209496_at	RARRES2	0.505351	8.17414e-10			213943_at	200804_at	TMBIM6	-0.393013	8.98896e-08
	213943_at	209210_s_at	FERMT2	0.501023	3.25e-12				213943_at	209210_s_at	FERMT2	0.501023	8.17414e-10			213943_at	204088_at	P2RX4	-0.391014	1.08321e-07
	213943_at	44702_at	SYDE1	0.500946	3.25e-12				213943_at	44702_at	SYDE1	0.500946	8.17414e-10			213943_at	201805_at	PRKAG1	-0.388735	1.31638e-07
	213943_at	201069_at	MMP2	0.500483	3.25e-12				213943_at	201069_at	MMP2	0.500483	8.17414e-10			213943_at	208764_s_at	ATP5G2	-0.388252	1.36688e-07
	213943_at	211709_s_at	CLEC11A	0.498418	3.25e-12				213943_at	211709_s_at	CLEC11A	0.498418	8.17414e-10			213943_at	202889_x_at	MAP7	-0.386716	1.57201e-07
	213943_at	206101_at	ECM2	0.498387	3.25e-12				213943_at	206101_at	ECM2	0.498387	8.17414e-10			213943_at	217748_at	ADIPOR1	-0.385533	1.72853e-07
	213943_at	204955_at	SRPX	0.496687	3.25e-12				213943_at	204955_at	SRPX	0.496687	8.17414e-10			213943_at	209350_s_at	D4S234E / GPS2	-0.383689	2.01568e-07
	213943_at	207030_s_at	CSRP2	0.494133	3.25e-12				213943_at	207030_s_at	CSRP2	0.494133	8.17414e-10			213943_at	208270_s_at	RNPEP	-0.38342	2.05997e-07
	213943_at	213652_at	PCSK5	0.493468	3.25e-12				213943_at	213652_at	PCSK5	0.493468	8.17414e-10			213943_at	202915_s_at	FAM20B	-0.383258	2.07669e-07
	213943_at	203498_at	RCAN2	0.491097	3.26e-12				213943_at	203498_at	RCAN2	0.491097	8.17414e-10			213943_at	201264_at	COPE	-0.38307	2.1038e-07
	213943_at	213413_at	STON1	0.491065	3.26e-12				213943_at	213413_at	STON1	0.491065	8.17414e-10			213943_at	208684_at	COPA	-0.380988	2.512e-07
	213943_at	203886_s_at	FBLN2	0.486576	3.26e-12				213943_at	203886_s_at	FBLN2	0.486576	8.17414e-10			213943_at	217770_at	PIGT	-0.3787	3.03491e-07
	213943_at	208747_s_at	C1S	0.485524	3.27e-12				213943_at	208747_s_at	C1S	0.485524	8.17414e-10			213943_at	208926_at	NEU1	-0.377607	3.2575e-07
	213943_at	204083_s_at	TPM2	0.484292	3.27e-12				213943_at	204083_s_at	TPM2	0.484292	8.17414e-10			213943_at	204331_s_at	MRPS12	-0.375734	3.81609e-07
	213943_at	203766_s_at	LMOD1	0.484033	3.27e-12				213943_at	203766_s_at	LMOD1	0.484033	8.17414e-10			213943_at	210826_x_at	RAD17	-0.374696	4.11114e-07
	213943_at	204359_at	FLRT2	0.481501	3.28e-12				213943_at	204359_at	FLRT2	0.481501	8.17414e-10			213943_at	217726_at	COPZ1	-0.373989	4.35269e-07
	213943_at	213800_at	CFH	0.481309	3.28e-12				213943_at	213800_at	CFH	0.481309	8.17414e-10			213943_at	202545_at	PRKCD	-0.37204	5.19236e-07
	213943_at	204749_at	NAP1L3	0.480922	3.28e-12				213943_at	204749_at	NAP1L3	0.480922	8.17414e-10			213943_at	202941_at	NDUFV2	-0.370863	5.72163e-07
	213943_at	203083_at	THBS2	0.480248	3.29e-12				213943_at	203083_at	THBS2	0.480248	8.17414e-10			213943_at	220342_x_at	EDEM3	-0.370733	5.75731e-07
	213943_at	214247_s_at	DKK3	0.477754	3.3e-12				213943_at	214247_s_at	DKK3	0.477754	8.17414e-10			213943_at	208759_at	NCSTN	-0.370609	5.75731e-07
	213943_at	209568_s_at	RGL1	0.475488	3.32e-12				213943_at	209568_s_at	RGL1	0.475488	8.17414e-10			213943_at	207628_s_at	WBSCR22	-0.369773	6.1826e-07
	213943_at	203865_s_at	ADARB1	0.473791	3.34e-12				213943_at	203865_s_at	ADARB1	0.473791	8.17414e-10			213943_at	218261_at	AP1M2	-0.368461	6.98428e-07
	213943_at	203903_s_at	HEPH	0.473735	3.34e-12				213943_at	203903_s_at	HEPH	0.473735	8.17414e-10			213943_at	202645_s_at	MEN1	-0.368212	7.12577e-07
	213943_at	213010_at	PRKCDBP	0.472404	3.36e-12				213943_at	213010_at	PRKCDBP	0.472404	8.17414e-10			213943_at	218112_at	MRPS34	-0.364959	9.30058e-07
	213943_at	209596_at	MXRA5	0.470633	3.39e-12				213943_at	209596_at	MXRA5	0.470633	8.17414e-10			213943_at	202454_s_at	ERBB3	-0.364768	9.42664e-07
	213943_at	65718_at	GPR124	0.470344	3.39e-12				213943_at	65718_at	GPR124	0.470344	8.17414e-10			213943_at	220642_x_at	GPR89A / GPR89B	-0.36358	1.03995e-06
	213943_at	209651_at	TGFB1I1	0.469629	3.41e-12				213943_at	209651_at	TGFB1I1	0.469629	8.17414e-10			213943_at	220581_at	C6orf97	-0.361514	1.2389e-06
	213943_at	218974_at	SOBP	0.468781	3.43e-12				213943_at	218974_at	SOBP	0.468781	8.17414e-10			213943_at	216242_x_at	POLR2J2	-0.361467	1.2389e-06
	213943_at	213428_s_at	COL6A1	0.464023	3.59e-12				213943_at	213428_s_at	COL6A1	0.464023	8.17414e-10			213943_at	202164_s_at	CNOT8	-0.360599	1.31966e-06
	213943_at	201431_s_at	DPYSL3	0.463814	3.59e-12				213943_at	201431_s_at	DPYSL3	0.463814	8.17414e-10			213943_at	204398_s_at	EML2	-0.360383	1.34155e-06
	213943_at	202555_s_at	MYLK	0.463486	3.61e-12				213943_at	202555_s_at	MYLK	0.463486	8.17414e-10			213943_at	215711_s_at	WEE1	-0.360109	1.36596e-06
	213943_at	205802_at	TRPC1	0.462992	3.63e-12				213943_at	205802_at	TRPC1	0.462992	8.17414e-10			213943_at	212166_at	XPO7	-0.356937	1.75558e-06
	213943_at	201185_at	HTRA1	0.462262	3.67e-12				213943_at	201185_at	HTRA1	0.462262	8.17414e-10			213943_at	201460_at	MAPKAPK2	-0.356133	1.87403e-06
	213943_at	209946_at	VEGFC	0.461357	3.73e-12				213943_at	209946_at	VEGFC	0.461357	8.17414e-10			213943_at	200828_s_at	ZNF207	-0.354423	2.13886e-06
	213943_at	217525_at	OLFML1	0.459862	3.83e-12				213943_at	217525_at	OLFML1	0.459862	8.22199e-10			213943_at	220477_s_at	C20orf30	-0.354343	2.14923e-06
	213943_at	201261_x_at	BGN	0.458586	3.93e-12				213943_at	201261_x_at	BGN	0.458586	8.24307e-10			213943_at	205512_s_at	AIFM1	-0.354142	2.18043e-06
	213943_at	203939_at	NT5E	0.457456	4.04e-12				213943_at	203939_at	NT5E	0.457456	8.24307e-10			213943_at	210638_s_at	FBXO9	-0.354027	2.18657e-06
	213943_at	218418_s_at	KANK2	0.456799	4.11e-12				213943_at	218418_s_at	KANK2	0.456799	8.24307e-10			213943_at	218931_at	RAB17	-0.354005	2.18657e-06
	213943_at	209505_at	NR2F1	0.455919	4.21e-12				213943_at	209505_at	NR2F1	0.455919	8.24307e-10			213943_at	215023_s_at	PEX1	-0.352971	2.36933e-06
	213943_at	204464_s_at	EDNRA	0.455619	4.25e-12				213943_at	204464_s_at	EDNRA	0.455619	8.24307e-10			213943_at	218229_s_at	POGK	-0.352605	2.43527e-06
	213943_at	206571_s_at	MAP4K4	0.455166	4.31e-12				213943_at	206571_s_at	MAP4K4	0.455166	8.24307e-10			213943_at	207809_s_at	ATP6AP1	-0.351813	2.56836e-06
	213943_at	201300_s_at	PRNP	0.454608	4.39e-12				213943_at	201300_s_at	PRNP	0.454608	8.24614e-10			213943_at	206036_s_at	REL	-0.351648	2.59667e-06
	213943_at	213069_at	HEG1	0.452002	4.84e-12				213943_at	213069_at	HEG1	0.452002	8.93192e-10			213943_at	201530_x_at	EIF4A1	-0.351597	2.60172e-06
	213943_at	205308_at	FAM164A	0.451315	4.98e-12				213943_at	205308_at	FAM164A	0.451315	9.03183e-10			213943_at	202263_at	CYB5R1	-0.351308	2.66262e-06
	213943_at	203868_s_at	VCAM1	0.449953	5.3e-12				213943_at	203868_s_at	VCAM1	0.449953	9.44927e-10			213943_at	203109_at	UBE2M	-0.350698	2.7877e-06
	213943_at	204872_at	TLE4	0.448815	5.62e-12				213943_at	204872_at	TLE4	0.448815	9.8528e-10			213943_at	221759_at	G6PC3	-0.350552	2.80615e-06
	213943_at	209905_at	HOXA9	0.447918	5.9e-12				213943_at	209905_at	HOXA9	0.447918	1.01741e-09			213943_at	203342_at	TIMM17B	-0.349176	3.10817e-06
	213943_at	213316_at	KIAA1462	0.445934	6.64e-12				213943_at	213316_at	KIAA1462	0.445934	1.12655e-09			213943_at	202996_at	POLD4	-0.349177	3.10817e-06
	213943_at	203323_at	CAV2	0.445308	6.92e-12				213943_at	203323_at	CAV2	0.445308	1.15542e-09			213943_at	203557_s_at	PCBD1	-0.348511	3.23662e-06
	213943_at	203889_at	SCG5	0.444666	7.22e-12				213943_at	203889_at	SCG5	0.444666	1.16842e-09			213943_at	221189_s_at	TARS2	-0.348232	3.31039e-06
	213943_at	207943_x_at	PLAGL1	0.444661	7.22e-12				213943_at	207943_x_at	PLAGL1	0.444661	1.16842e-09			213943_at	220248_x_at	NSFL1C	-0.347661	3.43478e-06
	213943_at	221748_s_at	TNS1	0.443427	7.87e-12				213943_at	221748_s_at	TNS1	0.443427	1.25431e-09			213943_at	205707_at	IL17RA	-0.347514	3.48595e-06
	213943_at	207808_s_at	PROS1	0.441429	9.16e-12				213943_at	207808_s_at	PROS1	0.441429	1.43812e-09			213943_at	206016_at	CCDC22	-0.346949	3.64821e-06
	213943_at	215388_s_at	CFH /CFHR1	0.441164	9.35e-12				213943_at	215388_s_at	CFH / CFHR1	0.441164	1.4411e-09			213943_at	221688_s_at	IMP3	-0.346716	3.67713e-06
	213943_at	205226_at	PDGFRL	0.440996	9.48e-12				213943_at	205226_at	PDGFRL	0.440996	1.4411e-09			213943_at	201895_at	ARAF	-0.346203	3.81425e-06
	213943_at	202664_at	WIPF1	0.440857	9.59e-12				213943_at	202664_at	WIPF1	0.440857	1.4411e-09			213943_at	205597_at	SLC44A4	-0.345901	3.88166e-06
	213943_at	217904_s_at	BACE1	0.439652	1.06e-11				213943_at	217904_s_at	BACE1	0.439652	1.57044e-09			213943_at	221856_s_at	FAM63A	-0.345526	4.01849e-06
	213943_at	219427_at	FAT4	0.439129	1.11e-11				213943_at	219427_at	FAT4	0.439129	1.61387e-09			213943_at	201420_s_at	WDR77	-0.342647	5.01587e-06
	213943_at	209285_s_at	C3orf63	0.438971	1.12e-11				213943_at	209285_s_at	C3orf63	0.438971	1.61387e-09			213943_at	202784_s_at	NNT	-0.342496	5.07421e-06
	213943_at	204115_at	GNG11	0.438665	1.15e-11				213943_at	204115_at	GNG11	0.438665	1.63471e-09			213943_at	203576_at	BCAT2	-0.341687	5.3864e-06
	213943_at	204575_s_at	MMP19	0.438063	1.21e-11				213943_at	204575_s_at	MMP19	0.438063	1.69707e-09			213943_at	201937_s_at	DNPEP	-0.341311	5.52598e-06
	213943_at	213119_at	SLC36A1	0.436922	1.35e-11				213943_at	213119_at	SLC36A1	0.436922	1.86851e-09			213943_at	217791_s_at	ALDH18A1	-0.341048	5.60827e-06
	213943_at	204589_at	NUAK1	0.433778	1.81e-11				213943_at	204589_at	NUAK1	0.433778	2.47265e-09			213943_at	213412_at	TJP3	-0.340436	5.86531e-06
	213943_at	218469_at	GREM1	0.433437	1.87e-11				213943_at	218469_at	GREM1	0.433437	2.52186e-09			213943_at	200001_at	CAPNS1	-0.34011	5.98354e-06
	213943_at	212169_at	FKBP9	0.433241	1.91e-11				213943_at	212169_at	FKBP9	0.433241	2.5432e-09			213943_at	217100_s_at	UBXN7	-0.339672	6.1226e-06
	213943_at	212067_s_at	C1R	0.432963	1.96e-11				213943_at	212067_s_at	C1R	0.432963	2.57715e-09			213943_at	208682_s_at	MAGED2	-0.339468	6.15162e-06
	213943_at	221541_at	CRISPLD2	0.432596	2.04e-11				213943_at	221541_at	CRISPLD2	0.432596	2.61692e-09			213943_at	209696_at	FBP1	-0.338577	6.55798e-06
	213943_at	202192_s_at	GAS7	0.431888	2.19e-11				213943_at	202192_s_at	GAS7	0.431888	2.7755e-09			213943_at	213190_at	COG7	-0.338153	6.74362e-06
	213943_at	219479_at	KDELC1	0.430354	2.56e-11				213943_at	219479_at	KDELC1	0.430354	3.11943e-09			213943_at	217786_at	PRMT5	-0.337968	6.81403e-06
	213943_at	218656_s_at	LHFP	0.430264	2.58e-11				213943_at	218656_s_at	LHFP	0.430264	3.11943e-09			213943_at	206845_s_at	RNF40	-0.336978	7.39939e-06
	213943_at	221731_x_at	VCAN	0.430088	2.63e-11				213943_at	221731_x_at	VCAN	0.430088	3.14375e-09			213943_at	220739_s_at	CNNM3	-0.336649	7.56855e-06
	213943_at	221127_s_at	DKK3	0.428923	2.97e-11				213943_at	221127_s_at	DKK3	0.428923	3.50633e-09			213943_at	206724_at	CBX4	-0.335086	8.5214e-06
	213943_at	201438_at	COL6A3	0.428832	3e-11				213943_at	201438_at	COL6A3	0.428832	3.50633e-09			213943_at	218947_s_at	MTPAP	-0.334895	8.61102e-06
	213943_at	204682_at	LTBP2	0.427571	3.42e-11				213943_at	204682_at	LTBP2	0.427571	3.91032e-09			213943_at	222125_s_at	P4HTM	-0.334817	8.64061e-06
	213943_at	200665_s_at	SPARC	0.427332	3.51e-11				213943_at	200665_s_at	SPARC	0.427332	3.97007e-09			213943_at	209831_x_at	DNASE2	-0.334662	8.74501e-06
	213943_at	204345_at	COL16A1	0.427222	3.55e-11				213943_at	204345_at	COL16A1	0.427222	3.9726e-09			213943_at	203228_at	PAFAH1B3	-0.334311	8.95234e-06
	213943_at	211458_s_at	GABARAPL1	0.426841	3.7e-11				213943_at	211458_s_at	GABARAPL1 /GABARAPL3	0.426841	4.09687e-09			213943_at	202109_at	ARFIP2	-0.333813	9.32817e-06
	213943_at	218194_at	REXO2	0.426713	3.75e-11				213943_at	218194_at	REXO2	0.426713	4.10898e-09			213943_at	204934_s_at	HPN	-0.333778	9.33097e-06
	213943_at	212607_at	AKT3	0.426142	3.98e-11				213943_at	212607_at	AKT3	0.426142	4.31604e-09			213943_at	209852_x_at	PSME3	-0.333379	9.60752e-06
	213943_at	201012_at	ANXA1	0.425269	4.37e-11				213943_at	201012_at	ANXA1	0.425269	4.69062e-09			213943_at	208620_at	PCBP1	-0.332968	9.86004e-06
	213943_at	206377_at	FOXF2	0.425113	4.45e-11				213943_at	206377_at	FOXF2	0.425113	4.72824e-09			213943_at	202474_s_at	HCFC1	-0.332253	1.0446e-05
	213943_at	214438_at	HLX	0.424324	4.84e-11				213943_at	214438_at	HLX	0.424324	5.06162e-09			213943_at	221247_s_at	WBSCR16	-0.331998	1.06405e-05
	213943_at	209721_s_at	IFFO1	0.424278	4.86e-11				213943_at	209721_s_at	IFFO1	0.424278	5.06162e-09			213943_at	201499_s_at	USP7	-0.331933	1.06887e-05
	213943_at	212761_at	TCF7L2	0.423685	5.19e-11				213943_at	212761_at	TCF7L2	0.423685	5.35231e-09			213943_at	203266_s_at	MAP2K4	-0.331786	1.0785e-05
	213943_at	205666_at	FMO1	0.423176	5.48e-11				213943_at	205666_at	FMO1	0.423176	5.59652e-09			213943_at	201284_s_at	APEH	-0.330764	1.16452e-05
	213943_at	210794_s_at	MEG3	0.422926	5.63e-11				213943_at	210794_s_at	MEG3	0.422926	5.69442e-09			213943_at	200948_at	MLF2	-0.330265	1.20387e-05
	213943_at	206765_at	KCNJ2	0.422075	6.17e-11				213943_at	206765_at	KCNJ2	0.422075	6.18116e-09			213943_at	210085_s_at	ANXA9	-0.330149	1.213e-05
	213943_at	214110_s_at	BF195104	0.419767	7.94e-11				213943_at	214110_s_at	BF195104 / LOC440886	0.419767	7.73341e-09			213943_at	205238_at	TRMT2B	-0.329941	1.23115e-05
	213943_at	200974_at	ACTA2	0.419199	8.45e-11				213943_at	200974_at	ACTA2	0.419199	8.15464e-09			213943_at	210859_x_at	CLN3	-0.329927	1.23115e-05
	213943_at	204612_at	PKIA	0.418347	9.27e-11				213943_at	204612_at	PKIA	0.418347	8.86465e-09			213943_at	209249_s_at	GHITM	-0.329761	1.24209e-05
	213943_at	202388_at	RGS2	0.417599	1.01e-10				213943_at	202388_at	RGS2	0.417599	9.57134e-09			213943_at	208938_at	PRCC	-0.329615	1.25293e-05
	213943_at	204780_s_at	FAS	0.417218	1.05e-10				213943_at	204780_s_at	FAS	0.417218	9.77429e-09			213943_at	208910_s_at	C1QBP	-0.329019	1.29306e-05
	213943_at	219935_at	ADAMTS5	0.417182	1.05e-10				213943_at	219935_at	ADAMTS5	0.417182	9.77429e-09			213943_at	214552_s_at	RABEP1	-0.329029	1.29306e-05
	213943_at	219773_at	NOX4	0.41608	1.19e-10				213943_at	219773_at	NOX4	0.41608	1.09804e-08			213943_at	201966_at	NDUFS2	-0.328295	1.35861e-05
	213943_at	210105_s_at	FYN	0.415638	1.25e-10				213943_at	210105_s_at	FYN	0.415638	1.13282e-08			213943_at	219015_s_at	ALG13	-0.327938	1.39575e-05
	213943_at	204556_s_at	DZIP1	0.41561	1.25e-10				213943_at	204556_s_at	DZIP1	0.41561	1.13282e-08			213943_at	200846_s_at	PPP1CA	-0.32793	1.39575e-05
	213943_at	201744_s_at	LUM	0.415514	1.26e-10				213943_at	201744_s_at	LUM	0.415514	1.13282e-08			213943_at	220588_at	BCAS4	-0.327097	1.47937e-05
	213943_at	209473_at	ENTPD1	0.414999	1.34e-10				213943_at	209473_at	ENTPD1	0.414999	1.19453e-08			213943_at	207170_s_at	LETMD1	-0.326719	1.52313e-05
	213943_at	202766_s_at	FBN1	0.411799	1.9e-10				213943_at	202766_s_at	FBN1	0.411799	1.6795e-08			213943_at	200885_at	RHOC	-0.326463	1.55005e-05
	213943_at	218625_at	NRN1	0.411176	2.03e-10				213943_at	218625_at	NRN1	0.411176	1.77946e-08			213943_at	205354_at	GAMT	-0.326155	1.58006e-05
	213943_at	212558_at	SPRY1	0.409703	2.38e-10				213943_at	212558_at	SPRY1	0.409703	2.06903e-08			213943_at	209504_s_at	PLEKHB1	-0.325882	1.61203e-05
	213943_at	212865_s_at	COL14A1	0.409354	2.48e-10				213943_at	212865_s_at	COL14A1	0.409354	2.1209e-08			213943_at	210827_s_at	ELF3	-0.325644	1.63947e-05
	213943_at	212097_at	CAV1	0.40933	2.48e-10				213943_at	212097_at	CAV1	0.40933	2.1209e-08			213943_at	209665_at	CYB561D2	-0.325474	1.65674e-05
	213943_at	208782_at	FSTL1	0.408248	2.79e-10				213943_at	208782_at	FSTL1	0.408248	2.36678e-08			213943_at	221423_s_at	YIPF5	-0.325376	1.66642e-05
	213943_at	204517_at	PPIC	0.408055	2.85e-10				213943_at	204517_at	PPIC	0.408055	2.39833e-08			213943_at	209428_s_at	ZFPL1	-0.324725	1.74377e-05
	213943_at	203305_at	F13A1	0.407723	2.95e-10				213943_at	203305_at	F13A1	0.407723	2.44339e-08			213943_at	200064_at	HSP90AB1	-0.323446	1.91703e-05
	213943_at	202450_s_at	CTSK	0.407479	3.03e-10				213943_at	202450_s_at	CTSK	0.407479	2.48705e-08			213943_at	218688_at	DAK	-0.323286	1.9349e-05
	213943_at	219157_at	KLHL2	0.407439	3.05e-10				213943_at	219157_at	KLHL2	0.407439	2.48705e-08			213943_at	221222_s_at	C1orf56	-0.322509	2.04855e-05
	213943_at	200762_at	DPYSL2	0.406515	3.37e-10				213943_at	200762_at	DPYSL2	0.406515	2.71406e-08			213943_at	203258_at	DRAP1	-0.32175	2.14972e-05
	213943_at	209304_x_at	GADD45B	0.406477	3.38e-10				213943_at	209304_x_at	GADD45B	0.406477	2.71406e-08			213943_at	209100_at	IFRD2	-0.321571	2.16629e-05
	213943_at	201811_x_at	SH3BP5	0.406205	3.48e-10				213943_at	201811_x_at	SH3BP5	0.406205	2.77319e-08			213943_at	205617_at	PRRG2	-0.321334	2.19924e-05
	213943_at	221203_s_at	YEATS2	0.405044	3.94e-10				213943_at	221203_s_at	YEATS2	0.405044	3.06289e-08			213943_at	218340_s_at	UBA6	-0.320806	2.28943e-05
	213943_at	204040_at	RNF144A	0.405005	3.96e-10				213943_at	204040_at	RNF144A	0.405005	3.06289e-08			213943_at	208813_at	GOT1	-0.320296	2.35347e-05
	213943_at	215076_s_at	COL3A1	0.403179	4.82e-10				213943_at	215076_s_at	COL3A1	0.403179	3.68165e-08			213943_at	219816_s_at	RBM23	-0.319912	2.41653e-05
	213943_at	209183_s_at	C10orf10	0.403154	4.83e-10				213943_at	209183_s_at	C10orf10	0.403154	3.68165e-08			213943_at	204805_s_at	H1FX	-0.319819	2.43214e-05
	213943_at	209191_at	TUBB6	0.403059	4.88e-10				213943_at	209191_at	TUBB6	0.403059	3.693e-08			213943_at	211936_at	HSPA5	-0.319525	2.47388e-05
	213943_at	201310_s_at	C5orf13	0.402929	4.95e-10				213943_at	201310_s_at	C5orf13	0.402929	3.71922e-08			213943_at	204066_s_at	AGAP1	-0.319526	2.47388e-05
	213943_at	212642_s_at	HIVEP2	0.402612	5.12e-10				213943_at	212642_s_at	HIVEP2	0.402612	3.81967e-08			213943_at	201276_at	RAB5B	-0.319324	2.5093e-05
	213943_at	208966_x_at	IFI16	0.402367	5.26e-10				213943_at	208966_x_at	IFI16	0.402367	3.87658e-08			213943_at	218756_s_at	DHRS11	-0.319155	2.53494e-05
	213943_at	205824_at	HSPB2	0.402332	5.27e-10				213943_at	205824_at	HSPB2	0.402332	3.87658e-08			213943_at	200850_s_at	AHCYL1	-0.319039	2.54044e-05
	213943_at	219778_at	ZFPM2	0.402224	5.34e-10				213943_at	219778_at	ZFPM2	0.402224	3.9008e-08			213943_at	222212_s_at	LASS2	-0.317989	2.73809e-05
	213943_at	201160_s_at	CSDA	0.402052	5.44e-10				213943_at	201160_s_at	CSDA	0.402052	3.94644e-08			213943_at	202740_at	ACY1	-0.317917	2.7475e-05
	213943_at	1598_g_at	GAS6	0.401013	6.07e-10				213943_at	1598_g_at	GAS6	0.401013	4.34356e-08			213943_at	203871_at	SENP3	-0.31782	2.75172e-05
	213943_at	201324_at	EMP1	0.400831	6.19e-10				213943_at	201324_at	EMP1	0.400831	4.3995e-08			213943_at	217777_s_at	PTPLAD1	-0.317842	2.75172e-05
	213943_at	215446_s_at	LOX	0.400253	6.58e-10				213943_at	215446_s_at	LOX	0.400253	4.6453e-08			213943_at	219858_s_at	MFSD6	-0.317844	2.75172e-05
	213943_at	200911_s_at	TACC1	0.397983	8.37e-10				213943_at	200911_s_at	TACC1	0.397983	5.8696e-08			213943_at	216032_s_at	ERGIC3	-0.317721	2.76099e-05
	213943_at	213071_at	DPT	0.397758	8.57e-10				213943_at	213071_at	DPT	0.397758	5.97005e-08			213943_at	201771_at	SCAMP3	-0.316943	2.90378e-05
	213943_at	201553_s_at	LAMP1	0.397261	9.03e-10				213943_at	201553_s_at	LAMP1	0.397261	6.24912e-08			213943_at	201378_s_at	UBAP2L	-0.316879	2.91236e-05
	213943_at	221729_at	COL5A2	0.396216	1.01e-09				213943_at	221729_at	COL5A2	0.396216	6.94392e-08			213943_at	218062_x_at	CDC42EP4	-0.316406	3.01087e-05
	213943_at	219134_at	ELTD1	0.395676	1.07e-09				213943_at	219134_at	ELTD1	0.395676	7.30866e-08			213943_at	205321_at	EIF2S3	-0.315608	3.1784e-05
	213943_at	206481_s_at	LDB2	0.395472	1.09e-09				213943_at	206481_s_at	LDB2	0.395472	7.39723e-08			213943_at	217854_s_at	POLR2E	-0.315611	3.1784e-05
	213943_at	212414_s_at	GLYR1	0.39481	1.17e-09				213943_at	212414_s_at	GLYR1 / SEPT6	0.39481	7.7404e-08			213943_at	206059_at	ZNF91	-0.315522	3.19158e-05
	213943_at	212646_at	RFTN1	0.394777	1.17e-09				213943_at	212646_at	RFTN1	0.394777	7.7404e-08			213943_at	210523_at	BMPR1B	-0.315258	3.26127e-05
	213943_at	202668_at	EFNB2	0.393404	1.35e-09				213943_at	202668_at	EFNB2	0.393404	8.76583e-08			213943_at	206491_s_at	NAPA	-0.315118	3.29307e-05
	213943_at	204482_at	CLDN5	0.393173	1.39e-09				213943_at	204482_at	CLDN5	0.393173	8.91549e-08			213943_at	220038_at	C8orf44 / SGK3	-0.31497	3.32476e-05
	213943_at	204897_at	PTGER4	0.393116	1.39e-09				213943_at	204897_at	PTGER4	0.393116	8.91549e-08			213943_at	213079_at	TSR2	-0.314567	3.41914e-05
	213943_at	205805_s_at	ROR1	0.391616	1.63e-09				213943_at	205805_s_at	ROR1	0.391616	1.03289e-07			213943_at	206441_s_at	COMMD4	-0.314278	3.46923e-05
	213943_at	213113_s_at	SLC43A3	0.391101	1.72e-09				213943_at	213113_s_at	SLC43A3	0.391101	1.08321e-07			213943_at	201079_at	SYNGR2	-0.314296	3.46923e-05
	213943_at	213001_at	ANGPTL2	0.390479	1.83e-09				213943_at	213001_at	ANGPTL2	0.390479	1.13853e-07			213943_at	212053_at	PDXDC1	-0.313929	3.54324e-05
	213943_at	219213_at	JAM2	0.390433	1.84e-09				213943_at	219213_at	JAM2	0.390433	1.13853e-07			213943_at	221664_s_at	F11R	-0.313742	3.5923e-05
	213943_at	212089_at	LMNA	0.390162	1.89e-09				213943_at	212089_at	LMNA	0.390162	1.16263e-07			213943_at	218967_s_at	PTER	-0.312377	3.95602e-05
	213943_at	202912_at	ADM	0.390039	1.92e-09				213943_at	202912_at	ADM	0.390039	1.17421e-07			213943_at	202356_s_at	GTF2F1	-0.312377	3.95602e-05
	213943_at	200953_s_at	CCND2	0.38963	2e-09				213943_at	200953_s_at	CCND2	0.38963	1.21607e-07			213943_at	208884_s_at	UBR5	-0.311991	4.06251e-05
	213943_at	212012_at	PXDN	0.389466	2.03e-09				213943_at	212012_at	PXDN	0.389466	1.22722e-07			213943_at	215758_x_at	ZNF93	-0.311825	4.10983e-05
	213943_at	209687_at	CXCL12	0.38867	2.21e-09				213943_at	209687_at	CXCL12	0.38867	1.32085e-07			213943_at	217932_at	MRPS7	-0.310753	4.42622e-05
	213943_at	201029_s_at	CD99	0.388074	2.35e-09				213943_at	201029_s_at	CD99	0.388074	1.38874e-07			213943_at	207949_s_at	ICA1	-0.310634	4.44691e-05
	213943_at	218559_s_at	MAFB	0.387713	2.43e-09				213943_at	218559_s_at	MAFB	0.387713	1.428e-07			213943_at	208996_s_at	POLR2C	-0.310081	4.61983e-05
	213943_at	208982_at	PECAM1	0.38662	2.72e-09				213943_at	208982_at	PECAM1	0.38662	1.58076e-07			213943_at	217799_x_at	UBE2H	-0.30983	4.70073e-05
	213943_at	209732_at	CLEC2B	0.386191	2.84e-09				213943_at	209732_at	CLEC2B	0.386191	1.64143e-07			213943_at	201953_at	CIB1	-0.309816	4.70261e-05
	213943_at	204140_at	TPST1	0.385897	2.93e-09				213943_at	204140_at	TPST1	0.385897	1.68419e-07			213943_at	201376_s_at	HNRNPF	-0.308549	5.13678e-05
	213943_at	218380_at	LOC728392/NLRP1	0.385564	3.03e-09				213943_at	218380_at	LOC728392 / NLRP1	0.385564	1.72853e-07			213943_at	217917_s_at	DYNLRB1	-0.30847	5.16324e-05
	213943_at	204235_s_at	GULP1	0.385067	3.19e-09				213943_at	204235_s_at	GULP1	0.385067	1.80407e-07			213943_at	205059_s_at	IDUA	-0.307755	5.40632e-05
	213943_at	204036_at	LPAR1	0.384956	3.22e-09				213943_at	204036_at	LPAR1	0.384956	1.81129e-07			213943_at	200000_s_at	PRPF8	-0.307702	5.40632e-05
	213943_at	220356_at	CORIN	0.384809	3.27e-09				213943_at	220356_at	CORIN	0.384809	1.82963e-07			213943_at	217099_s_at	GEMIN4	-0.307649	5.4147e-05
	213943_at	211340_s_at	MCAM	0.384651	3.32e-09				213943_at	211340_s_at	MCAM	0.384651	1.84778e-07			213943_at	214670_at	ZKSCAN1	-0.307542	5.44857e-05
	213943_at	205442_at	MFAP3L	0.384398	3.41e-09				213943_at	205442_at	MFAP3L	0.384398	1.88788e-07			213943_at	202799_at	CLPP	-0.307453	5.4562e-05
	213943_at	206702_at	TEK	0.383244	3.83e-09				213943_at	206702_at	TEK	0.383244	2.07669e-07			213943_at	209114_at	TSPAN1	-0.307132	5.58395e-05
	213943_at	207826_s_at	ID3	0.382992	3.93e-09				213943_at	207826_s_at	ID3	0.382992	2.10917e-07			213943_at	208862_s_at	CTNND1	-0.307019	5.61694e-05
	213943_at	209291_at	ID4	0.382881	3.97e-09				213943_at	209291_at	ID4	0.382881	2.11443e-07			213943_at	218608_at	ATP13A2	-0.30658	5.77448e-05
	213943_at	219700_at	PLXDC1	0.382854	3.98e-09				213943_at	219700_at	PLXDC1	0.382854	2.11443e-07			213943_at	201672_s_at	USP14	-0.30628	5.88123e-05
	213943_at	205529_s_at	RUNX1T1	0.382574	4.1e-09				213943_at	205529_s_at	RUNX1T1	0.382574	2.16723e-07			213943_at	202253_s_at	DNM2	-0.306101	5.9295e-05
	213943_at	221950_at	EMX2	0.381209	4.7e-09				213943_at	221950_at	EMX2	0.381209	2.47196e-07			213943_at	213947_s_at	NUP210	-0.306007	5.95132e-05
	213943_at	213942_at	MEGF6	0.380784	4.9e-09				213943_at	213942_at	MEGF6	0.380784	2.55164e-07			213943_at	217891_at	C16orf58	-0.305572	6.11262e-05
	213943_at	203607_at	INPP5F	0.380536	5.03e-09				213943_at	203607_at	INPP5F	0.380536	2.60643e-07			213943_at	213702_x_at	ASAH1	-0.30523	6.23897e-05
	213943_at	205117_at	FGF1	0.380348	5.12e-09				213943_at	205117_at	FGF1	0.380348	2.64006e-07			213943_at	212025_s_at	FLII	-0.305105	6.28514e-05
	213943_at	213381_at	C10orf72	0.37979	5.41e-09				213943_at	213381_at	C10orf72	0.37979	2.77599e-07			213943_at	209940_at	PARP3	-0.30481	6.39647e-05
	213943_at	201162_at	IGFBP7	0.379503	5.57e-09				213943_at	201162_at	IGFBP7	0.379503	2.84422e-07			213943_at	217729_s_at	AES	-0.304816	6.39647e-05
	213943_at	218854_at	DSE	0.379355	5.65e-09				213943_at	218854_at	DSE	0.379355	2.87113e-07			213943_at	204247_s_at	CDK5	-0.30455	6.5071e-05
	213943_at	219165_at	PDLIM2	0.379	5.86e-09				213943_at	219165_at	PDLIM2	0.379	2.96353e-07			213943_at	207348_s_at	LIG3	-0.304256	6.61287e-05
	213943_at	213262_at	SACS	0.378514	6.15e-09				213943_at	213262_at	SACS	0.378514	3.08056e-07			213943_at	210719_s_at	HMG20B	-0.304236	6.61888e-05
	213943_at	201307_at	?	0.378287	6.29e-09				213943_at	201307_at	SEPT11	0.378287	3.12097e-07			213943_at	217973_at	DCXR	-0.30394	6.73345e-05
	213943_at	214051_at	TMSB15B	0.378276	6.29e-09				213943_at	214051_at	TMSB15B	0.378276	3.12097e-07			213943_at	201706_s_at	PEX19	-0.303172	7.09272e-05
	213943_at	200795_at	SPARCL1	0.377908	6.53e-09				213943_at	200795_at	SPARCL1	0.377908	3.20977e-07			213943_at	202525_at	PRSS8	-0.302996	7.16697e-05
	213943_at	212488_at	COL5A1	0.377897	6.53e-09				213943_at	212488_at	COL5A1	0.377897	3.20977e-07			213943_at	208811_s_at	DNAJB6 / TMEM135	-0.30289	7.18719e-05
	213943_at	203741_s_at	ADCY7	0.377751	6.63e-09				213943_at	203741_s_at	ADCY7	0.377751	3.22875e-07			213943_at	201118_at	PGD	-0.302783	7.23973e-05
	213943_at	221870_at	EHD2	0.377745	6.63e-09				213943_at	221870_at	EHD2	0.377745	3.22875e-07			213943_at	203142_s_at	AP3B1	-0.302133	7.536e-05
	213943_at	213194_at	ROBO1	0.377405	6.86e-09				213943_at	213194_at	ROBO1	0.377405	3.31011e-07			213943_at	202632_at	DPH1 / OVCA2	-0.301985	7.60315e-05
	213943_at	200897_s_at	PALLD	0.376977	7.16e-09				213943_at	200897_s_at	PALLD	0.376977	3.42824e-07			213943_at	201640_x_at	CLPTM1	-0.301974	7.60749e-05
	213943_at	204671_s_at	ANKRD6	0.376955	7.17e-09				213943_at	204671_s_at	ANKRD6	0.376955	3.42824e-07			213943_at	204667_at	FOXA1	-0.301809	7.68997e-05
	213943_at	203060_s_at	PAPSS2	0.376545	7.47e-09				213943_at	203060_s_at	PAPSS2	0.376545	3.55552e-07			213943_at	209916_at	DHTKD1	-0.301658	7.75659e-05
	213943_at	204069_at	MEIS1	0.376271	7.67e-09				213943_at	204069_at	MEIS1	0.376271	3.63427e-07			213943_at	218510_x_at	FAM134B	-0.301371	7.84677e-05
	213943_at	212233_at	MAP1B	0.375682	8.13e-09				213943_at	212233_at	MAP1B	0.375682	3.81783e-07			213943_at	208612_at	PDIA3	-0.300691	8.19165e-05
	213943_at	205109_s_at	ARHGEF4	0.375381	8.37e-09				213943_at	205109_s_at	ARHGEF4	0.375381	3.91307e-07			213943_at	211934_x_at	GANAB	-0.300656	8.19841e-05
	213943_at	213543_at	SGCD	0.374962	8.72e-09				213943_at	213543_at	SGCD	0.374962	4.05866e-07			213943_at	215735_s_at	TSC2	-0.300554	8.22367e-05
	213943_at	201885_s_at	CYB5R3	0.374861	8.81e-09				213943_at	201885_s_at	CYB5R3	0.374861	4.08248e-07			213943_at	218342_s_at	ERMP1	-0.299105	9.06137e-05
	213943_at	207988_s_at	ARPC2	0.374775	8.89e-09				213943_at	207988_s_at	ARPC2	0.374775	4.10149e-07			213943_at	201557_at	VAMP2	-0.298777	9.26032e-05
	213943_at	214375_at	LOC729222 / PPFIBP1	0.374584	9.05e-09				213943_at	214375_at	LOC729222 /PPFIBP1	0.374584	4.139e-07			213943_at	204031_s_at	PCBP2	-0.298579	9.38181e-05
	213943_at	217730_at	TMBIM1	0.374152	9.44e-09				213943_at	217730_at	TMBIM1	0.374152	4.29867e-07			213943_at	211110_s_at	AR	-0.297952	9.76128e-05
	213943_at	203636_at	MID1	0.373927	9.65e-09				213943_at	203636_at	MID1	0.373927	4.35658e-07			213943_at	218270_at	MRPL24	-0.297954	9.76128e-05
	213943_at	218651_s_at	LARP6	0.372683	1.09e-08				213943_at	218651_s_at	LARP6	0.372683	4.89988e-07			213943_at	202812_at	GAA	-0.297765	9.89587e-05
	213943_at	208636_at	ACTN1	0.371769	1.19e-08				213943_at	208636_at	ACTN1	0.371769	5.30407e-07			213943_at	200645_at	GABARAP	-0.297184	0.000102538
	213943_at	203562_at	FEZ1	0.370958	1.29e-08				213943_at	203562_at	FEZ1	0.370958	5.72163e-07			213943_at	201715_s_at	ACIN1	-0.297104	0.000102983
	213943_at	212918_at	RECQL	0.370835	1.3e-08				213943_at	212918_at	RECQL	0.370835	5.72163e-07			213943_at	208991_at	STAT3	-0.296946	0.000103871
	213943_at	211651_s_at	LAMB1	0.370769	1.31e-08				213943_at	211651_s_at	LAMB1	0.370769	5.74162e-07			213943_at	202658_at	PEX11B	-0.296678	0.000105775
	213943_at	219179_at	DACT1	0.370641	1.33e-08				213943_at	219179_at	DACT1	0.370641	5.75731e-07			213943_at	202891_at	NIT1	-0.296452	0.000107233
	213943_at	212265_at	QKI	0.37007	1.4e-08				213943_at	212265_at	QKI	0.37007	6.03549e-07			213943_at	208009_s_at	ARHGEF16	-0.296383	0.000107663
	213943_at	202336_s_at	PAM	0.368599	1.62e-08				213943_at	202336_s_at	PAM	0.368599	6.92715e-07			213943_at	217736_s_at	EIF2AK1	-0.296363	0.000107663
	213943_at	209894_at	LEPR	0.366982	1.89e-08				213943_at	209894_at	LEPR	0.366982	7.9843e-07			213943_at	204285_s_at	PMAIP1	-0.296072	0.000109833
	213943_at	209167_at	GPM6B	0.366853	1.91e-08				213943_at	209167_at	GPM6B	0.366853	8.03652e-07			213943_at	201267_s_at	PSMC3	-0.295979	0.000110261
	213943_at	56197_at	PLSCR3	0.366812	1.92e-08				213943_at	56197_at	PLSCR3	0.366812	8.04641e-07			213943_at	202793_at	LPCAT3	-0.295899	0.000110681
	213943_at	214761_at	ZNF423	0.366648	1.95e-08				213943_at	214761_at	ZNF423	0.366648	8.1397e-07			213943_at	218178_s_at	CHMP1B	-0.29518	0.000115609
	213943_at	205100_at	GFPT2	0.366506	1.98e-08				213943_at	205100_at	GFPT2	0.366506	8.23226e-07			213943_at	212032_s_at	PTOV1	-0.294812	0.000117824
	213943_at	207173_x_at	CDH11	0.365935	2.09e-08				213943_at	207173_x_at	CDH11	0.365935	8.6554e-07			213943_at	218866_s_at	POLR3K	-0.294371	0.00012094
	213943_at	203695_s_at	DFNA5	0.365475	2.18e-08				213943_at	203695_s_at	DFNA5	0.365475	8.99271e-07			213943_at	217991_x_at	SSBP3	-0.294365	0.00012094
	213943_at	204114_at	NID2	0.365188	2.24e-08				213943_at	204114_at	NID2	0.365188	9.20412e-07			213943_at	218218_at	APPL2	-0.294339	0.00012094
	213943_at	203688_at	PKD2	0.365003	2.28e-08				213943_at	203688_at	PKD2	0.365003	9.30058e-07			213943_at	218013_x_at	DCTN4	-0.294322	0.00012094
	213943_at	202403_s_at	COL1A2	0.364968	2.29e-08				213943_at	202403_s_at	COL1A2	0.364968	9.30058e-07			213943_at	203031_s_at	UROS	-0.294257	0.000121481
	213943_at	217118_s_at	C22orf9	0.364639	2.36e-08				213943_at	217118_s_at	C22orf9	0.364639	9.51143e-07			213943_at	203357_s_at	CAPN7	-0.293998	0.000123539
	213943_at	212566_at	MAP4	0.364446	2.4e-08				213943_at	212566_at	MAP4	0.364446	9.63573e-07			213943_at	211337_s_at	TUBGCP4	-0.293601	0.000126367
	213943_at	208851_s_at	THY1	0.363892	2.53e-08				213943_at	208851_s_at	THY1	0.363892	1.0119e-06			213943_at	219750_at	TMEM144	-0.293403	0.000127979
	213943_at	221884_at	MECOM	0.362716	2.83e-08				213943_at	221884_at	MECOM	0.362716	1.12308e-06			213943_at	201104_x_at	NBPF10 /NBPF11	-0.293269	0.000129059
	213943_at	212713_at	MFAP4	0.362676	2.84e-08				213943_at	212713_at	MFAP4	0.362676	1.12308e-06			213943_at	213175_s_at	SNRPB	-0.293213	0.000129443
	213943_at	213620_s_at	ICAM2	0.36157	3.15e-08				213943_at	213620_s_at	ICAM2	0.36157	1.2389e-06			213943_at	204360_s_at	NAGLU	-0.292921	0.000131695
	213943_at	203435_s_at	MME	0.361474	3.18e-08				213943_at	203435_s_at	MME	0.361474	1.2389e-06			213943_at	200922_at	KDELR1	-0.292354	0.000136678
	213943_at	212632_at	STX7	0.361326	3.22e-08				213943_at	212632_at	STX7	0.361326	1.24526e-06			213943_at	209873_s_at	PKP3	-0.292243	0.000137324
	213943_at	202701_at	BMP1	0.361324	3.22e-08				213943_at	202701_at	BMP1	0.361324	1.24526e-06			213943_at	218797_s_at	SIRT7	-0.2922	0.000138336
	213943_at	219677_at	SPSB1	0.360868	3.36e-08				213943_at	219677_at	SPSB1	0.360868	1.29465e-06			213943_at	201145_at	HAX1	-0.291547	0.0001427
	213943_at	222154_s_at	SPATS2L	0.360809	3.38e-08				213943_at	222154_s_at	SPATS2L	0.360809	1.2976e-06			213943_at	218458_at	GMCL1	-0.291165	0.00014621
	213943_at	209815_at	PTCH1	0.360304	3.54e-08				213943_at	209815_at	PTCH1	0.360304	1.34431e-06			213943_at	201698_s_at	SFRS9	-0.29119	0.00014621
	213943_at	219025_at	CD248	0.35982	3.71e-08				213943_at	219025_at	CD248	0.35982	1.39876e-06			213943_at	208828_at	POLE3	-0.291226	0.00014621
	213943_at	213699_s_at	YWHAQ	0.35938	3.86e-08				213943_at	213699_s_at	YWHAQ	0.35938	1.45012e-06			213943_at	220587_s_at	MLST8	-0.290988	0.000148345
	213943_at	217989_at	HSD17B11	0.359292	3.89e-08				213943_at	217989_at	HSD17B11	0.359292	1.45619e-06			213943_at	221620_s_at	APOO	-0.291001	0.000148345
	213943_at	214394_x_at	EEF1D	0.359201	3.93e-08				213943_at	214394_x_at	EEF1D	0.359201	1.46595e-06			213943_at	203073_at	COG2	-0.290784	0.000149502
	213943_at	213062_at	NTAN1	0.35892	4.03e-08				213943_at	213062_at	NTAN1	0.35892	1.49794e-06			213943_at	203892_at	WFDC2	-0.290687	0.000150656
	213943_at	201125_s_at	ITGB5	0.358088	4.35e-08				213943_at	201125_s_at	ITGB5	0.358088	1.61118e-06			213943_at	221853_s_at	NOMO1 /NOMO2	-0.290557	0.00015142
	213943_at	209708_at	MOXD1	0.357899	4.43e-08				213943_at	209708_at	MOXD1	0.357899	1.63506e-06			213943_at	209529_at	PPAP2C	-0.290614	0.00015142
	213943_at	221447_s_at	GLT8D2	0.357587	4.56e-08				213943_at	221447_s_at	GLT8D2	0.357587	1.67498e-06			213943_at	202826_at	SPINT1	-0.290379	0.000153708
	213943_at	208944_at	TGFBR2	0.357568	4.57e-08				213943_at	208944_at	TGFBR2	0.357568	1.67498e-06			213943_at	208807_s_at	CHD3	-0.289968	0.000157518
	213943_at	201792_at	AEBP1	0.357364	4.66e-08				213943_at	201792_at	AEBP1	0.357364	1.69978e-06			213943_at	213292_s_at	SNX13	-0.28968	0.000160504
	213943_at	221898_at	PDPN	0.35734	4.67e-08				213943_at	221898_at	PDPN	0.35734	1.69978e-06			213943_at	211874_s_at	MYST4	-0.289097	0.000166298
	213943_at	206326_at	GRP	0.356383	5.1e-08				213943_at	206326_at	GRP	0.356383	1.84354e-06			213943_at	212126_at	CBX5	-0.288944	0.000167198
	213943_at	207719_x_at	CEP170	0.356335	5.12e-08				213943_at	207719_x_at	CEP170	0.356335	1.84443e-06			213943_at	203515_s_at	PMVK	-0.289037	0.000167198
	213943_at	206163_at	MAB21L1	0.356009	5.28e-08				213943_at	206163_at	MAB21L1	0.356009	1.88913e-06			213943_at	214527_s_at	PQBP1	-0.288872	0.000168094
	213943_at	209118_s_at	TUBA1A	0.35585	5.35e-08				213943_at	209118_s_at	TUBA1A	0.35585	1.90124e-06			213943_at	206782_s_at	DNAJC4	-0.288689	0.000170295
	213943_at	201719_s_at	EPB41L2	0.355848	5.35e-08				213943_at	201719_s_at	EPB41L2	0.355848	1.90124e-06			213943_at	221771_s_at	MPHOSPH8	-0.288503	0.000171179
	213943_at	212082_s_at	MYL6	0.355558	5.5e-08				213943_at	212082_s_at	MYL6	0.355558	1.94796e-06			213943_at	221452_s_at	TMEM14B	-0.28851	0.000171179
	213943_at	209348_s_at	MAF	0.355421	5.57e-08				213943_at	209348_s_at	MAF	0.355421	1.96614e-06			213943_at	207081_s_at	PI4KA	-0.288433	0.000171845
	213943_at	214104_at	GPR161	0.354806	5.89e-08				213943_at	214104_at	GPR161	0.354806	2.07214e-06			213943_at	212380_at	FTSJD2	-0.288051	0.00017618
	213943_at	203823_at	RGS3	0.354096	6.29e-08				213943_at	203823_at	RGS3	0.354096	2.18365e-06			213943_at	49327_at	SIRT3	-0.287537	0.000181762
	213943_at	202157_s_at	CUGBP2	0.353769	6.48e-08				213943_at	202157_s_at	CUGBP2	0.353769	2.22755e-06			213943_at	202296_s_at	RER1	-0.287329	0.000183441
	213943_at	213139_at	SNAI2	0.353677	6.53e-08				213943_at	213139_at	SNAI2	0.353677	2.23743e-06			213943_at	200011_s_at	ARF3	-0.28698	0.000188343
	213943_at	221773_at	ELK3	0.353381	6.71e-08				213943_at	221773_at	ELK3	0.353381	2.29164e-06			213943_at	205566_at	ABHD2	-0.286677	0.000191953
	213943_at	202948_at	IL1R1	0.352792	7.08e-08				213943_at	202948_at	IL1R1	0.352792	2.4024e-06			213943_at	218584_at	TCTN1	-0.286222	0.00019763
	213943_at	220079_s_at	USP48	0.352463	7.29e-08				213943_at	220079_s_at	USP48	0.352463	2.4578e-06			213943_at	219928_s_at	CABYR	-0.286155	0.000198664
	213943_at	201289_at	CYR61	0.352236	7.45e-08				213943_at	201289_at	CYR61	0.352236	2.50372e-06			213943_at	208914_at	GGA2	-0.286051	0.000199454
	213943_at	213415_at	CLIC2	0.352103	7.54e-08				213943_at	213415_at	CLIC2	0.352103	2.51788e-06			213943_at	221437_s_at	MRPS15	-0.286075	0.000199454
	213943_at	217733_s_at	TMSB10	0.352093	7.54e-08				213943_at	217733_s_at	TMSB10	0.352093	2.51788e-06			213943_at	210720_s_at	NECAB3	-0.285869	0.000201509
	213943_at	205330_at	MN1	0.351954	7.64e-08				213943_at	205330_at	MN1	0.351954	2.5432e-06			213943_at	40489_at	ATN1	-0.285586	0.000205064
	213943_at	208131_s_at	PTGIS	0.351112	8.24e-08				213943_at	208131_s_at	PTGIS	0.351112	2.69509e-06			213943_at	208675_s_at	DDOST	-0.285133	0.00021038
	213943_at	209430_at	BTAF1	0.351097	8.25e-08				213943_at	209430_at	BTAF1	0.351097	2.69509e-06			213943_at	209407_s_at	DEAF1	-0.284972	0.000212645
	213943_at	201296_s_at	WSB1	0.350579	8.65e-08				213943_at	201296_s_at	WSB1	0.350579	2.80615e-06			213943_at	212041_at	ATP6V0D1	-0.284741	0.000214368
	213943_at	213568_at	OSR2	0.350366	8.82e-08				213943_at	213568_at	OSR2	0.350366	2.84594e-06			213943_at	203293_s_at	LMAN1	-0.284752	0.000214368
	213943_at	219884_at	LHX6	0.350149	8.99e-08				213943_at	219884_at	LHX6	0.350149	2.88952e-06			213943_at	203125_x_at	SLC11A2	-0.28427	0.00022054
	213943_at	212923_s_at	C6orf145	0.350123	9.01e-08				213943_at	212923_s_at	C6orf145	0.350123	2.88952e-06			213943_at	200708_at	GOT2	-0.284067	0.00022373
	213943_at	205304_s_at	KCNJ8	0.349753	9.32e-08				213943_at	205304_s_at	KCNJ8	0.349753	2.9772e-06			213943_at	212047_s_at	RNF167	-0.283701	0.000228406
	213943_at	209616_s_at	CES1	0.349729	9.34e-08				213943_at	209616_s_at	CES1	0.349729	2.9772e-06			213943_at	205750_at	BPHL	-0.283401	0.000232525
	213943_at	203212_s_at	MTMR2	0.349148	9.84e-08				213943_at	203212_s_at	MTMR2	0.349148	3.10832e-06			213943_at	200723_s_at	CAPRIN1	-0.283138	0.000236616
	213943_at	203935_at	ACVR1	0.349097	9.88e-08				213943_at	203935_at	ACVR1	0.349097	3.11161e-06			213943_at	212305_s_at	MIA3	-0.282844	0.000240958
	213943_at	219563_at	C14orf139	0.348997	9.97e-08				213943_at	219563_at	C14orf139	0.348997	3.13058e-06			213943_at	203458_at	SPR	-0.282854	0.000240958
	213943_at	61734_at	RCN3	0.348814	1.01e-07				213943_at	61734_at	RCN3	0.348814	3.16196e-06			213943_at	202071_at	SDC4	-0.282459	0.000245646
	213943_at	219655_at	C7orf10	0.348534	1.04e-07				213943_at	219655_at	C7orf10	0.348534	3.23662e-06			213943_at	220925_at	MAK10	-0.28239	0.000246577
	213943_at	218723_s_at	C13orf15	0.348197	1.07e-07				213943_at	218723_s_at	C13orf15	0.348197	3.31039e-06			213943_at	212152_x_at	ARID1A	-0.282124	0.000250856
	213943_at	210427_x_at	ANXA2	0.34815	1.08e-07				213943_at	210427_x_at	ANXA2	0.34815	3.33153e-06			213943_at	221256_s_at	HDHD3	-0.282093	0.000251778
	213943_at	209154_at	TAX1BP3	0.347999	1.09e-07				213943_at	209154_at	TAX1BP3	0.347999	3.35255e-06			213943_at	217780_at	C19orf56	-0.281788	0.000255444
	213943_at	207191_s_at	ISLR	0.347327	1.16e-07				213943_at	207191_s_at	ISLR	0.347327	3.53682e-06			213943_at	215794_x_at	GLUD2	-0.281753	0.000256355
	213943_at	217650_x_at	ST3GAL2	0.346803	1.21e-07				213943_at	217650_x_at	ST3GAL2	0.346803	3.65747e-06			213943_at	201113_at	TUFM	-0.281565	0.000258172
	213943_at	212771_at	FAM171A1	0.346788	1.21e-07				213943_at	212771_at	FAM171A1	0.346788	3.65747e-06			213943_at	201570_at	SAMM50	-0.280845	0.000271342
	213943_at	203097_s_at	RAPGEF2	0.346674	1.23e-07				213943_at	203097_s_at	RAPGEF2	0.346674	3.69668e-06			213943_at	200752_s_at	CAPN1	-0.280564	0.000274874
	213943_at	203951_at	CNN1	0.346306	1.27e-07				213943_at	203951_at	CNN1	0.346306	3.80602e-06			213943_at	206074_s_at	HMGA1	-0.280276	0.00028019
	213943_at	219729_at	PRRX2	0.346216	1.28e-07				213943_at	219729_at	PRRX2	0.346216	3.81425e-06			213943_at	36084_at	CUL7	-0.280068	0.000282477
	213943_at	204570_at	COX7A1	0.346003	1.3e-07				213943_at	204570_at	COX7A1	0.346003	3.86291e-06			213943_at	201282_at	OGDH	-0.279996	0.000282705
	213943_at	209656_s_at	TMEM47	0.345161	1.4e-07				213943_at	209656_s_at	TMEM47	0.345161	4.1251e-06			213943_at	211975_at	ARFGAP2	-0.280009	0.000282705
	213943_at	203284_s_at	HS2ST1	0.344657	1.47e-07				213943_at	203284_s_at	HS2ST1	0.344657	4.30722e-06			213943_at	200991_s_at	SNX17	-0.280036	0.000282705
	213943_at	201540_at	FHL1	0.344601	1.47e-07				213943_at	201540_at	FHL1	0.344601	4.30722e-06			213943_at	217782_s_at	GPS1	-0.279833	0.000285281
	213943_at	209466_x_at	PTN	0.344353	1.51e-07				213943_at	209466_x_at	PTN	0.344353	4.41214e-06			213943_at	200927_s_at	RAB14	-0.279195	0.000295556
	213943_at	218603_at	HECA	0.343883	1.57e-07				213943_at	218603_at	HECA	0.343883	4.57475e-06			213943_at	210137_s_at	DCTD	-0.278871	0.000301205
	213943_at	219594_at	NINJ2	0.343544	1.62e-07				213943_at	219594_at	NINJ2	0.343544	4.7074e-06			213943_at	200820_at	PSMD8	-0.278878	0.000301205
	213943_at	213151_s_at	SEPT7	0.343394	1.64e-07				213943_at	213151_s_at	SEPT7	0.343394	4.75239e-06			213943_at	219931_s_at	KLHL12	-0.278804	0.000302031
	213943_at	202720_at	TES	0.343187	1.67e-07				213943_at	202720_at	TES	0.343187	4.82602e-06			213943_at	201835_s_at	PRKAB1	-0.278539	0.000307141
	213943_at	222101_s_at	DCHS1	0.343006	1.7e-07				213943_at	222101_s_at	DCHS1	0.343006	4.89926e-06			213943_at	220174_at	LRRC8E	-0.27819	0.000313846
	213943_at	214043_at	PTPRD	0.342734	1.74e-07				213943_at	214043_at	PTPRD	0.342734	5.00084e-06			213943_at	216392_s_at	SEC23IP	-0.278071	0.000315455
	213943_at	203574_at	NFIL3	0.342457	1.78e-07				213943_at	203574_at	NFIL3	0.342457	5.07421e-06			213943_at	218813_s_at	SH3GLB2	-0.27794	0.000317058
	213943_at	214841_at	CNIH3	0.342096	1.84e-07				213943_at	214841_at	CNIH3	0.342096	5.21697e-06			213943_at	203682_s_at	IVD	-0.277968	0.000317058
	213943_at	212758_s_at	ZEB1	0.342069	1.84e-07				213943_at	212758_s_at	ZEB1	0.342069	5.21697e-06			213943_at	212268_at	SERPINB1	-0.277831	0.000317963
	213943_at	219770_at	GTDC1	0.342039	1.85e-07				213943_at	219770_at	GTDC1	0.342039	5.23122e-06			213943_at	203149_at	PVRL2	-0.277854	0.000317963
	213943_at	200696_s_at	GSN	0.341428	1.95e-07				213943_at	200696_s_at	GSN	0.341428	5.48451e-06			213943_at	205248_at	DOPEY2	-0.27786	0.000317963
	213943_at	213909_at	LRRC15	0.341126	2e-07				213943_at	213909_at	LRRC15	0.341126	5.59521e-06			213943_at	1007_s_at	DDR1	-0.27786	0.000317963
	213943_at	203854_at	CFI	0.340806	2.06e-07				213943_at	203854_at	CFI	0.340806	5.73258e-06			213943_at	207722_s_at	BTBD2	-0.277784	0.000318413
	213943_at	212399_s_at	VGLL4	0.340738	2.07e-07				213943_at	212399_s_at	VGLL4	0.340738	5.74521e-06			213943_at	202024_at	ASNA1	-0.277679	0.000320341
	213943_at	201497_x_at	MYH11	0.340548	2.1e-07				213943_at	201497_x_at	MYH11	0.340548	5.81313e-06			213943_at	219081_at	ANKHD1	-0.277372	0.0003254
	213943_at	209818_s_at	HABP4	0.340539	2.11e-07				213943_at	209818_s_at	HABP4	0.340539	5.82548e-06			213943_at	202326_at	EHMT2	-0.277181	0.000328157
	213943_at	219762_s_at	RPL36	0.340265	2.16e-07				213943_at	219762_s_at	RPL36	0.340265	5.93239e-06			213943_at	203972_s_at	PEX3	-0.277211	0.000328157
	213943_at	202207_at	ARL4C	0.340213	2.17e-07				213943_at	202207_at	ARL4C	0.340213	5.94433e-06			213943_at	200852_x_at	GNB2	-0.277054	0.000330821
	213943_at	209436_at	SPON1	0.339978	2.21e-07				213943_at	209436_at	SPON1	0.339978	6.0186e-06			213943_at	201932_at	LRRC41	-0.27629	0.000345815
	213943_at	219167_at	RASL12	0.339945	2.22e-07				213943_at	219167_at	RASL12	0.339945	6.0186e-06			213943_at	201779_s_at	RNF13	-0.276293	0.000345815
	213943_at	213541_s_at	ERG	0.339919	2.22e-07				213943_at	213541_s_at	ERG	0.339919	6.0186e-06			213943_at	201673_s_at	GYS1	-0.27539	0.000366119
	213943_at	205381_at	LRRC17	0.339856	2.24e-07				213943_at	205381_at	LRRC17	0.339856	6.05721e-06			213943_at	201520_s_at	GRSF1	-0.275317	0.000366839
	213943_at	202969_at	DYRK2	0.33962	2.28e-07				213943_at	202969_at	DYRK2	0.33962	6.13384e-06			213943_at	208978_at	CRIP2	-0.275261	0.000368662
	213943_at	221261_x_at	MAGED4/ MAGED4B	0.339581	2.29e-07				213943_at	221261_x_at	MAGED4 / MAGED4B	0.339581	6.14503e-06			213943_at	221194_s_at	RNFT1	-0.275215	0.000369378
	213943_at	219743_at	HEY2	0.339546	2.3e-07				213943_at	219743_at	HEY2	0.339546	6.15162e-06			213943_at	38707_r_at	E2F4	-0.275133	0.000370093
	213943_at	209193_at	PIM1	0.33946	2.31e-07				213943_at	209193_at	PIM1	0.33946	6.15162e-06			213943_at	208973_at	ERI3	-0.275022	0.00037184
	213943_at	202465_at	PCOLCE	0.339389	2.33e-07				213943_at	202465_at	PCOLCE	0.339389	6.18921e-06			213943_at	209953_s_at	CDC37	-0.2748	0.000376147
	213943_at	206584_at	LY96	0.339274	2.35e-07				213943_at	206584_at	LY96	0.339274	6.22661e-06			213943_at	220189_s_at	MGAT4B	-0.274705	0.000377549
	213943_at	213273_at	ODZ4	0.33904	2.4e-07				213943_at	213273_at	ODZ4	0.33904	6.34312e-06			213943_at	202914_s_at	ARHGEF11	-0.274709	0.000377549
	213943_at	214639_s_at	HOXA1	0.338804	2.45e-07				213943_at	214639_s_at	HOXA1	0.338804	6.44289e-06			213943_at	200030_s_at	SLC25A3	-0.274652	0.000379338
	213943_at	205618_at	PRRG1	0.338779	2.45e-07				213943_at	205618_at	PRRG1	0.338779	6.44289e-06			213943_at	201886_at	DCAF11	-0.274529	0.000381817
	213943_at	210517_s_at	AKAP12	0.338432	2.53e-07				213943_at	210517_s_at	AKAP12	0.338432	6.62017e-06			213943_at	201419_at	BAP1	-0.274368	0.000384974
	213943_at	212915_at	PDZRN3	0.338229	2.57e-07				213943_at	212915_at	PDZRN3	0.338229	6.70815e-06			213943_at	202749_at	WRB	-0.274185	0.00038851
	213943_at	205006_s_at	NMT2	0.338061	2.61e-07				213943_at	205006_s_at	NMT2	0.338061	6.77891e-06			213943_at	202417_at	KEAP1	-0.274186	0.00038851
	213943_at	202007_at	NID1	0.337261	2.8e-07				213943_at	202007_at	NID1	0.337261	7.23666e-06			213943_at	217964_at	TTC19	-0.273513	0.000404411
	213943_at	203603_s_at	ZEB2	0.336824	2.9e-07				213943_at	203603_s_at	ZEB2	0.336824	7.45846e-06			213943_at	208922_s_at	NXF1	-0.273462	0.000405073
	213943_at	206734_at	JRKL	0.336194	3.07e-07				213943_at	206734_at	JRKL	0.336194	7.85726e-06			213943_at	212602_at	WDFY3	-0.273117	0.000411799
	213943_at	200771_at	LAMC1	0.335575	3.23e-07				213943_at	200771_at	LAMC1	0.335575	8.24669e-06			213943_at	209195_s_at	ADCY6	-0.272929	0.000416288
	213943_at	209323_at	PRKRIR	0.335448	3.27e-07				213943_at	209323_at	PRKRIR	0.335448	8.3286e-06			213943_at	202538_s_at	CHMP2B	-0.272906	0.00041651
	213943_at	213154_s_at	BICD2	0.33537	3.29e-07				213943_at	213154_s_at	BICD2	0.33537	8.3593e-06			213943_at	219121_s_at	ESRP1	-0.272723	0.000420972
	213943_at	211675_s_at	MDFIC	0.335172	3.35e-07				213943_at	211675_s_at	MDFIC	0.335172	8.49124e-06			213943_at	212059_s_at	TRPC4AP	-0.272723	0.000420972
	213943_at	205022_s_at	FOXN3	0.334897	3.43e-07				213943_at	205022_s_at	FOXN3	0.334897	8.61102e-06			213943_at	201704_at	ENTPD6	-0.27262	0.000422242
	213943_at	209081_s_at	COL18A1	0.334896	3.43e-07				213943_at	209081_s_at	COL18A1	0.334896	8.61102e-06			213943_at	217794_at	PRR13	-0.272649	0.000422242
	213943_at	206637_at	P2RY14	0.334585	3.52e-07				213943_at	206637_at	P2RY14	0.334585	8.77414e-06			213943_at	212694_s_at	PCCB	-0.272418	0.000427301
	213943_at	212364_at	MYO1B	0.333392	3.89e-07				213943_at	212364_at	MYO1B	0.333392	9.60538e-06			213943_at	217960_s_at	TOMM22	-0.272352	0.000428981
	213943_at	201034_at	ADD3	0.33331	3.92e-07				213943_at	201034_at	ADD3	0.33331	9.63422e-06			213943_at	218190_s_at	UCRC	-0.272164	0.000433817
	213943_at	215271_at	TNN	0.33329	3.93e-07				213943_at	215271_at	TNN	0.33329	9.63629e-06			213943_at	206031_s_at	USP5	-0.272121	0.000434001
	213943_at	214938_x_at	HMGB1	0.333227	3.95e-07				213943_at	214938_x_at	HMGB1	0.333227	9.6628e-06			213943_at	201454_s_at	NPEPPS	-0.272103	0.000434617
	213943_at	209392_at	ENPP2	0.331343	4.63e-07				213943_at	209392_at	ENPP2	0.331343	1.11704e-05			213943_at	200617_at	MLEC	-0.271816	0.000441254
	213943_at	205932_s_at	MSX1	0.330948	4.79e-07				213943_at	205932_s_at	MSX1	0.330948	1.153e-05			213943_at	215599_at	LOC653188	-0.271524	0.000448282
	213943_at	205572_at	ANGPT2	0.330897	4.81e-07				213943_at	205572_at	ANGPT2	0.330897	1.15517e-05			213943_at	203093_s_at	TIMM44	-0.271443	0.000449922
	213943_at	203186_s_at	S100A4	0.330524	4.96e-07				213943_at	203186_s_at	S100A4	0.330524	1.18578e-05			213943_at	218367_x_at	USP21	-0.271305	0.000453638
	213943_at	211031_s_at	CLIP2	0.330411	5.01e-07				213943_at	211031_s_at	CLIP2	0.330411	1.19502e-05			213943_at	207614_s_at	CUL1	-0.271191	0.000456446
	213943_at	208895_s_at	DDX18	0.330317	5.05e-07				213943_at	208895_s_at	DDX18	0.330317	1.20183e-05			213943_at	214440_at	NAT1	-0.271197	0.000456446
	213943_at	212360_at	AMPD2	0.329818	5.27e-07				213943_at	212360_at	AMPD2	0.329818	1.24016e-05			213943_at	217403_s_at	ZNF227	-0.271157	0.000457032
	213943_at	206693_at	IL7	0.329728	5.31e-07				213943_at	206693_at	IL7	0.329728	1.24401e-05			213943_at	218028_at	ELOVL1	-0.270984	0.000461759
	213943_at	213571_s_at	EIF4E2	0.329513	5.4e-07				213943_at	213571_s_at	EIF4E2	0.329513	1.25902e-05			213943_at	218439_s_at	COMMD10	-0.270812	0.000464649
	213943_at	219230_at	TMEM100	0.329493	5.41e-07				213943_at	219230_at	TMEM100	0.329493	1.25902e-05			213943_at	218094_s_at	DBNDD2 / SYS1	-0.270818	0.000464649
	213943_at	206638_at	HTR2B	0.329407	5.45e-07				213943_at	206638_at	HTR2B	0.329407	1.26553e-05			213943_at	209333_at	ULK1	-0.270786	0.000465224
	213943_at	203909_at	SLC9A6	0.329356	5.47e-07				213943_at	203909_at	SLC9A6	0.329356	1.26738e-05			213943_at	208737_at	ATP6V1G1	-0.270708	0.00046637
	213943_at	217975_at	WBP5	0.32911	5.59e-07				213943_at	217975_at	WBP5	0.32911	1.29233e-05			213943_at	65133_i_at	INO80B	-0.270568	0.000470587
	213943_at	219093_at	PID1	0.329031	5.62e-07				213943_at	219093_at	PID1	0.329031	1.29306e-05			213943_at	202386_s_at	KIAA0430	-0.270287	0.000477393
	213943_at	203697_at	FRZB	0.32879	5.74e-07				213943_at	203697_at	FRZB	0.32879	1.31259e-05			213943_at	217133_x_at	CYP2B6	-0.27022	0.000479993
	213943_at	208443_x_at	SHOX2	0.328778	5.74e-07				213943_at	208443_x_at	SHOX2	0.328778	1.31259e-05			213943_at	205963_s_at	DNAJA3	-0.270108	0.000482121
	213943_at	219569_s_at	TMEM22	0.328332	5.96e-07				213943_at	219569_s_at	TMEM22	0.328332	1.35861e-05			213943_at	212347_x_at	MXD4	-0.270075	0.000482206
	213943_at	213844_at	HOXA5	0.328298	5.98e-07				213943_at	213844_at	HOXA5	0.328298	1.35861e-05			213943_at	200053_at	SPAG7	-0.269952	0.000484868
	213943_at	219248_at	THUMPD2	0.327331	6.48e-07				213943_at	219248_at	THUMPD2	0.327331	1.46185e-05			213943_at	211251_x_at	NFYC	-0.269955	0.000484868
	213943_at	216840_s_at	LAMA2	0.327316	6.49e-07				213943_at	216840_s_at	LAMA2	0.327316	1.46185e-05			213943_at	220199_s_at	AIDA	-0.269956	0.000484868
	213943_at	207121_s_at	MAPK6	0.327213	6.55e-07				213943_at	207121_s_at	MAPK6	0.327213	1.47221e-05			213943_at	202622_s_at	ATXN2	-0.269755	0.000489538
	213943_at	205828_at	MMP3	0.327171	6.57e-07				213943_at	205828_at	MMP3	0.327171	1.47356e-05			213943_at	204710_s_at	WIPI2	-0.269761	0.000489538
	213943_at	205726_at	DIAPH2	0.326664	6.85e-07				213943_at	205726_at	DIAPH2	0.326664	1.52659e-05			213943_at	209432_s_at	CREB3	-0.269706	0.000491089
	213943_at	213644_at	CCDC46	0.326389	7.01e-07				213943_at	213644_at	CCDC46	0.326389	1.55566e-05			213943_at	218020_s_at	ZFAND3	-0.269637	0.000492164
	213943_at	219087_at	ASPN	0.326324	7.05e-07				213943_at	219087_at	ASPN	0.326324	1.56124e-05			213943_at	212300_at	TXLNA	-0.269601	0.000492229
	213943_at	204719_at	ABCA8	0.325528	7.53e-07				213943_at	204719_at	ABCA8	0.325528	1.65361e-05			213943_at	218500_at	C8orf55	-0.269592	0.000492764
	213943_at	221900_at	COL8A2	0.325331	7.65e-07				213943_at	221900_at	COL8A2	0.325331	1.66823e-05			213943_at	218409_s_at	DNAJC1	-0.268536	0.000524952
	213943_at	212536_at	ATP11B	0.325313	7.66e-07				213943_at	212536_at	ATP11B	0.325313	1.66823e-05			213943_at	207079_s_at	MED6	-0.268419	0.000527942
	213943_at	217897_at	FXYD6	0.324867	7.95e-07				213943_at	217897_at	FXYD6	0.324867	1.72781e-05			213943_at	213285_at	TMEM30B	-0.26825	0.000532406
	213943_at	212158_at	SDC2	0.32467	8.08e-07				213943_at	212158_at	SDC2	0.32467	1.74884e-05			213943_at	218734_at	NAT11	-0.268132	0.000535369
	213943_at	219806_s_at	C11orf75	0.324378	8.27e-07				213943_at	219806_s_at	C11orf75	0.324378	1.78629e-05			213943_at	209329_x_at	HIGD2A	-0.26801	0.000538826
	213943_at	205120_s_at	SGCB	0.323925	8.59e-07				213943_at	205120_s_at	SGCB	0.323925	1.8516e-05			213943_at	218186_at	RAB25	-0.267807	0.000544699
	213943_at	215000_s_at	FEZ2	0.32378	8.69e-07				213943_at	215000_s_at	FEZ2	0.32378	1.86933e-05			213943_at	201020_at	YWHAH	-0.267755	0.00054616
	213943_at	212848_s_at	C9orf3	0.323332	9.02e-07				213943_at	212848_s_at	C9orf3	0.323332	1.93241e-05			213943_at	217878_s_at	CDC27	-0.267655	0.000548561
	213943_at	204964_s_at	SSPN	0.32316	9.14e-07				213943_at	204964_s_at	SSPN	0.32316	1.95018e-05			213943_at	209954_x_at	SS18	-0.267636	0.000548561
	213943_at	202796_at	SYNPO	0.322666	9.52e-07				213943_at	202796_at	SYNPO	0.322666	2.02714e-05			213943_at	204312_x_at	CREB1	-0.267617	0.000549031
	213943_at	200632_s_at	NDRG1	0.322438	9.7e-07				213943_at	200632_s_at	NDRG1	0.322438	2.05714e-05			213943_at	61297_at	CASKIN2	-0.267486	0.000552394
	213943_at	204472_at	GEM	0.322293	9.81e-07				213943_at	204472_at	GEM	0.322293	2.07629e-05			213943_at	202152_x_at	USF2	-0.267445	0.000552859
	213943_at	212977_at	CXCR7	0.322249	9.85e-07				213943_at	212977_at	CXCR7	0.322249	2.08057e-05			213943_at	200776_s_at	BZW1 /BZW1L1	-0.267427	0.000553323
	213943_at	201603_at	PPP1R12A	0.322042	1e-06				213943_at	201603_at	PPP1R12A	0.322042	2.10802e-05			213943_at	221335_x_at	C19orf61	-0.26707	0.000564982
	213943_at	219837_s_at	CYTL1	0.321908	1.01e-06				213943_at	219837_s_at	CYTL1	0.321908	2.12484e-05			213943_at	36994_at	ATP6V0C	-0.266907	0.000571282
	213943_at	214150_x_at	ATP6V0E1	0.32182	1.02e-06				213943_at	214150_x_at	ATP6V0E1	0.32182	2.13733e-05			213943_at	212861_at	MFSD5	-0.266698	0.000577476
	213943_at	205020_s_at	ARL4A	0.321797	1.02e-06				213943_at	205020_s_at	ARL4A	0.321797	2.13733e-05			213943_at	220483_s_at	RNF19A	-0.266609	0.000579321
	213943_at	201141_at	GPNMB	0.321689	1.03e-06				213943_at	201141_at	GPNMB	0.321689	2.14972e-05			213943_at	212211_at	ANKRD17	-0.266473	0.000583529
	213943_at	218285_s_at	BDH2	0.32141	1.05e-06				213943_at	218285_s_at	BDH2	0.32141	2.1828e-05			213943_at	208649_s_at	VCP	-0.266339	0.000587287
	213943_at	218638_s_at	SPON2	0.321238	1.07e-06				213943_at	218638_s_at	SPON2	0.321238	2.21562e-05			213943_at	213057_at	ATPAF2	-0.266345	0.000587287
	213943_at	219368_at	NAP1L2	0.321078	1.08e-06				213943_at	219368_at	NAP1L2	0.321078	2.23193e-05			213943_at	202472_at	MPI	-0.265969	0.000600673
	213943_at	212190_at	SERPINE2	0.320674	1.12e-06				213943_at	212190_at	SERPINE2	0.320674	2.30553e-05			213943_at	221692_s_at	MRPL34	-0.265925	0.000602049
	213943_at	219506_at	C1orf54	0.320573	1.13e-06				213943_at	219506_at	C1orf54	0.320573	2.31705e-05			213943_at	202135_s_at	ACTR1B	-0.265853	0.000603833
	213943_at	205551_at	SV2B	0.320555	1.13e-06				213943_at	205551_at	SV2B	0.320555	2.31705e-05			213943_at	204004_at	PAWR	-0.265626	0.000612888
	213943_at	211945_s_at	ITGB1	0.320265	1.16e-06				213943_at	211945_s_at	ITGB1	0.320265	2.36933e-05			213943_at	200964_at	UBA1	-0.265538	0.000615208
	213943_at	220351_at	CCRL1	0.320056	1.18e-06				213943_at	220351_at	CCRL1	0.320056	2.40085e-05			213943_at	203054_s_at	TCTA	-0.265518	0.000615443
	213943_at	204939_s_at	PLN	0.320039	1.18e-06				213943_at	204939_s_at	PLN	0.320039	2.40085e-05			213943_at	210428_s_at	HGS	-0.265484	0.000615443
	213943_at	219523_s_at	ODZ3	0.319686	1.21e-06				213943_at	219523_s_at	ODZ3	0.319686	2.44769e-05			213943_at	201051_at	ANP32A	-0.265239	0.000624267
	213943_at	218999_at	TMEM140	0.31954	1.23e-06				213943_at	218999_at	TMEM140	0.31954	2.47388e-05			213943_at	212083_at	TEX261	-0.265173	0.000626562
	213943_at	213170_at	GPX7	0.319094	1.27e-06				213943_at	213170_at	GPX7	0.319094	2.53494e-05			213943_at	202874_s_at	ATP6V1C1	-0.265067	0.000629806
	213943_at	210511_s_at	INHBA	0.319072	1.27e-06				213943_at	210511_s_at	INHBA	0.319072	2.53494e-05			213943_at	208906_at	BSCL2	-0.264997	0.000632092
	213943_at	213793_s_at	HOMER1	0.318997	1.28e-06				213943_at	213793_s_at	HOMER1	0.318997	2.54044e-05			213943_at	219730_at	MED18	-0.264657	0.00064404
	213943_at	202729_s_at	LTBP1	0.318991	1.28e-06				213943_at	202729_s_at	LTBP1	0.318991	2.54044e-05			213943_at	209366_x_at	CYB5A	-0.264485	0.00064987
	213943_at	219454_at	EGFL6	0.31893	1.29e-06				213943_at	219454_at	EGFL6	0.31893	2.55546e-05			213943_at	204246_s_at	DCTN3	-0.264203	0.000660386
	213943_at	204759_at	RCBTB2	0.318449	1.34e-06				213943_at	204759_at	RCBTB2	0.318449	2.64952e-05			213943_at	220607_x_at	TH1L	-0.264072	0.000664854
	213943_at	204591_at	CHL1	0.318031	1.39e-06				213943_at	204591_at	CHL1	0.318031	2.73809e-05			213943_at	218506_x_at	GLYR1	-0.264024	0.000666141
	213943_at	203408_s_at	SATB1	0.317896	1.4e-06				213943_at	203408_s_at	SATB1	0.317896	2.7475e-05			213943_at	218143_s_at	SCAMP2	-0.263823	0.000672542
	213943_at	201842_s_at	EFEMP1	0.317719	1.42e-06				213943_at	201842_s_at	EFEMP1	0.317719	2.76099e-05			213943_at	201908_at	DVL3	-0.263778	0.000673216
	213943_at	206953_s_at	LPHN2	0.317674	1.43e-06				213943_at	206953_s_at	LPHN2	0.317674	2.77531e-05			213943_at	209011_at	TRIO	-0.263299	0.00069226
	213943_at	205545_x_at	DNAJC8	0.317237	1.48e-06				213943_at	205545_x_at	DNAJC8	0.317237	2.86706e-05			213943_at	209391_at	DPM2	-0.262982	0.000704987
	213943_at	202273_at	PDGFRB	0.317076	1.5e-06				213943_at	202273_at	PDGFRB	0.317076	2.89514e-05			213943_at	218016_s_at	POLR3E	-0.262819	0.000710543
	213943_at	208370_s_at	RCAN1	0.31705	1.5e-06				213943_at	208370_s_at	RCAN1	0.31705	2.89514e-05			213943_at	219369_s_at	OTUB2	-0.262745	0.000712996
	213943_at	203706_s_at	FZD7	0.316948	1.51e-06				213943_at	203706_s_at	FZD7	0.316948	2.90378e-05			213943_at	206900_x_at	ZNF253	-0.262627	0.000717289
	213943_at	209867_s_at	LPHN3	0.316863	1.52e-06				213943_at	209867_s_at	LPHN3	0.316863	2.91236e-05			213943_at	32836_at	AGPAT1	-0.262603	0.000717582
	213943_at	210357_s_at	SMOX	0.316728	1.54e-06				213943_at	210357_s_at	SMOX	0.316728	2.94532e-05			213943_at	218372_at	MED9	-0.262482	0.000721856
	213943_at	200834_s_at	LOC100291837/ RPS21	0.316534	1.56e-06				213943_at	200834_s_at	LOC100291837 / RPS21	0.316534	2.97816e-05			213943_at	208677_s_at	BSG	-0.262442	0.000722434
	213943_at	212724_at	RND3	0.316342	1.59e-06				213943_at	212724_at	RND3	0.316342	3.02445e-05			213943_at	209941_at	RIPK1	-0.262338	0.000726684
	213943_at	212687_at	LIMS1	0.315992	1.63e-06				213943_at	212687_at	LIMS1	0.315992	3.09494e-05			213943_at	218502_s_at	TRPS1	-0.262296	0.000727885
	213943_at	200986_at	SERPING1	0.314694	1.81e-06				213943_at	200986_at	SERPING1	0.314694	3.39383e-05			213943_at	208946_s_at	BECN1	-0.261977	0.000742841
	213943_at	213848_at	DUSP7	0.314546	1.83e-06				213943_at	213848_at	DUSP7	0.314546	3.41914e-05			213943_at	217883_at	MMADHC	-0.261792	0.000750441
	213943_at	203748_x_at	RBMS1	0.314417	1.85e-06				213943_at	203748_x_at	RBMS1	0.314417	3.44427e-05			213943_at	218685_s_at	SMUG1	-0.261317	0.000768906
	213943_at	204042_at	WASF3	0.314391	1.85e-06				213943_at	204042_at	WASF3	0.314391	3.44427e-05			213943_at	203476_at	TPBG	-0.261204	0.000773028
	213943_at	212221_x_at	IDS	0.314023	1.91e-06				213943_at	212221_x_at	IDS	0.314023	3.53098e-05			213943_at	205684_s_at	DENND4C	-0.261106	0.000776467
	213943_at	202283_at	SERPINF1	0.313991	1.91e-06				213943_at	202283_at	SERPINF1	0.313991	3.53098e-05			213943_at	219267_at	GLTP	-0.26109	0.000776704
	213943_at	218935_at	EHD3	0.313332	2.02e-06				213943_at	218935_at	EHD3	0.313332	3.70827e-05			213943_at	200793_s_at	ACO2	-0.260851	0.000786442
	213943_at	209358_at	TAF11	0.313327	2.02e-06				213943_at	209358_at	TAF11	0.313327	3.70827e-05			213943_at	212218_s_at	FASN	-0.260789	0.000788474
	213943_at	202087_s_at	CTSL1	0.312793	2.1e-06				213943_at	202087_s_at	CTSL1	0.312793	3.84841e-05			213943_at	217929_s_at	KIAA0319L	-0.260634	0.000794549
	213943_at	218641_at	LOC65998	0.312751	2.11e-06				213943_at	218641_at	LOC65998	0.312751	3.86002e-05			213943_at	203277_at	DFFA	-0.260483	0.00079991
	213943_at	221879_at	CALML4	0.312331	2.18e-06				213943_at	221879_at	CALML4	0.312331	3.96737e-05			213943_at	202475_at	TMEM147	-0.260487	0.00079991
	213943_at	212792_at	DPY19L1	0.312161	2.21e-06				213943_at	212792_at	DPY19L1	0.312161	4.01502e-05			213943_at	200678_x_at	GRN	-0.260291	0.000808396
	213943_at	213241_at	PLXNC1	0.311736	2.29e-06				213943_at	213241_at	PLXNC1	0.311736	4.13182e-05			213943_at	1053_at	RFC2	-0.260065	0.000819337
	213943_at	219902_at	BHMT2	0.311721	2.29e-06				213943_at	219902_at	BHMT2	0.311721	4.13182e-05			213943_at	211716_x_at	ARHGDIA	-0.259754	0.000834204
	213943_at	202350_s_at	MATN2	0.311655	2.3e-06				213943_at	202350_s_at	MATN2	0.311655	4.14276e-05			213943_at	212088_at	PMPCA	-0.259733	0.000834388
	213943_at	220403_s_at	TP53AIP1	0.310982	2.43e-06				213943_at	220403_s_at	TP53AIP1	0.310982	4.36943e-05			213943_at	218850_s_at	LIMD1	-0.259668	0.000837245
	213943_at	219410_at	TMEM45A	0.310835	2.45e-06				213943_at	219410_at	TMEM45A	0.310835	4.39788e-05			213943_at	201600_at	PHB2	-0.259558	0.000842054
	213943_at	213725_x_at	XYLT1	0.310719	2.48e-06				213943_at	213725_x_at	XYLT1	0.310719	4.43659e-05			213943_at	212782_x_at	POLR2J	-0.259536	0.000842231
	213943_at	212288_at	FNBP1	0.310319	2.55e-06				213943_at	212288_at	FNBP1	0.310319	4.54635e-05			213943_at	207291_at	PRRG4	-0.259351	0.000849135
	213943_at	203044_at	CHSY1	0.31012	2.59e-06				213943_at	203044_at	CHSY1	0.31012	4.60985e-05			213943_at	206098_at	ZBTB6	-0.259362	0.000849135
	213943_at	203881_s_at	DMD	0.309806	2.66e-06				213943_at	203881_s_at	DMD	0.309806	4.70261e-05			213943_at	221781_s_at	DNAJC10	-0.259214	0.000856383
	213943_at	39650_s_at	PCNXL2	0.309724	2.68e-06				213943_at	39650_s_at	PCNXL2	0.309724	4.73002e-05			213943_at	212726_at	PHF2	-0.259165	0.000858315
	213943_at	218901_at	PLSCR4	0.309302	2.77e-06				213943_at	218901_at	PLSCR4	0.309302	4.88068e-05			213943_at	203997_at	PTPN3	-0.259115	0.000859522
	213943_at	203837_at	MAP3K5	0.309187	2.79e-06				213943_at	203837_at	MAP3K5	0.309187	4.90769e-05			213943_at	208021_s_at	RFC1	-0.259058	0.000861607
	213943_at	207876_s_at	FLNC	0.309032	2.82e-06				213943_at	207876_s_at	FLNC	0.309032	4.95218e-05			213943_at	214667_s_at	TP53I11	-0.258971	0.000863841
	213943_at	214454_at	ADAMTS2	0.30841	2.96e-06				213943_at	214454_at	ADAMTS2	0.30841	5.17213e-05			213943_at	201802_at	SLC29A1	-0.25883	0.000870296
	213943_at	203700_s_at	DIO2	0.308362	2.98e-06				213943_at	203700_s_at	DIO2	0.308362	5.18984e-05			213943_at	201078_at	TM9SF2	-0.258797	0.000871324
	213943_at	203063_at	PPM1F	0.308353	2.98e-06				213943_at	203063_at	PPM1F	0.308353	5.18984e-05			213943_at	202718_at	IGFBP2	-0.258767	0.00087235
	213943_at	204249_s_at	LMO2	0.308137	3.03e-06				213943_at	204249_s_at	LMO2	0.308137	5.26819e-05			213943_at	202427_s_at	BRP44	-0.258742	0.000873375
	213943_at	213309_at	PLCL2	0.30787	3.09e-06				213943_at	213309_at	PLCL2	0.30787	5.36365e-05			213943_at	201783_s_at	RELA	-0.258668	0.000876583
	213943_at	200958_s_at	SDCBP	0.307702	3.13e-06				213943_at	200958_s_at	SDCBP	0.307702	5.40632e-05			213943_at	205761_s_at	DUS4L	-0.258632	0.00087766
	213943_at	212651_at	RHOBTB1	0.307562	3.17e-06				213943_at	212651_at	RHOBTB1	0.307562	5.44857e-05			213943_at	210006_at	ABHD14A	-0.258583	0.000878671
	213943_at	211764_s_at	UBE2D1	0.307507	3.18e-06				213943_at	211764_s_at	UBE2D1	0.307507	5.4562e-05			213943_at	221887_s_at	DFNB31	-0.258574	0.000878671
	213943_at	203650_at	PROCR	0.307453	3.19e-06				213943_at	203650_at	PROCR	0.307453	5.4562e-05			213943_at	209150_s_at	TM9SF1	-0.258564	0.000878671
	213943_at	218627_at	DRAM1	0.307119	3.28e-06				213943_at	218627_at	DRAM1	0.307119	5.59195e-05			213943_at	219035_s_at	RNF34	-0.258507	0.000880553
	213943_at	213485_s_at	ABCC10	0.306802	3.36e-06				213943_at	213485_s_at	ABCC10	0.306802	5.70062e-05			213943_at	214760_at	ZNF337	-0.25815	0.000897235
	213943_at	221530_s_at	BHLHE41	0.306802	3.36e-06				213943_at	221530_s_at	BHLHE41	0.306802	5.70062e-05			213943_at	218481_at	EXOSC5	-0.258005	0.000902615
	213943_at	205363_at	BBOX1	0.306611	3.41e-06				213943_at	205363_at	BBOX1	0.306611	5.76685e-05			213943_at	209148_at	RXRB	-0.257811	0.000910896
	213943_at	212887_at	SEC23A	0.306609	3.41e-06				213943_at	212887_at	SEC23A	0.306609	5.76685e-05			213943_at	209925_at	OCLN	-0.257794	0.000911165
	213943_at	213422_s_at	MXRA8	0.306437	3.45e-06				213943_at	213422_s_at	MXRA8	0.306437	5.81579e-05			213943_at	201350_at	FLOT2	-0.257685	0.000915299
	213943_at	218871_x_at	CSGALNACT2	0.306347	3.48e-06				213943_at	218871_x_at	CSGALNACT2	0.306347	5.85698e-05			213943_at	213535_s_at	UBE2I	-0.257583	0.000919972
	213943_at	213435_at	SATB2	0.306173	3.52e-06				213943_at	213435_at	SATB2	0.306173	5.9054e-05			213943_at	219350_s_at	DIABLO	-0.257162	0.000938751
	213943_at	202920_at	ANK2	0.30608	3.55e-06				213943_at	202920_at	ANK2	0.30608	5.9368e-05			213943_at	200594_x_at	HNRNPU	-0.256868	0.000952723
	213943_at	221872_at	RARRES1	0.306051	3.56e-06				213943_at	221872_at	RARRES1	0.306051	5.94407e-05			213943_at	212151_at	PBX1	-0.256757	0.000958625
	213943_at	206167_s_at	ARHGAP6	0.305963	3.58e-06				213943_at	206167_s_at	ARHGAP6	0.305963	5.95855e-05			213943_at	202189_x_at	PTBP1	-0.256679	0.000962641
	213943_at	213080_x_at	RPL5	0.305905	3.6e-06				213943_at	213080_x_at	RPL5	0.305905	5.98237e-05			213943_at	209625_at	PIGH	-0.256455	0.000974345
	213943_at	200701_at	NPC2	0.305719	3.65e-06				213943_at	200701_at	NPC2	0.305719	6.05589e-05			213943_at	209139_s_at	PRKRA	-0.256387	0.000977508
	213943_at	204944_at	PTPRG	0.305547	3.7e-06				213943_at	204944_at	PTPRG	0.305547	6.11954e-05			213943_at	201703_s_at	PPP1R10	-0.256287	0.000982975
	213943_at	214662_at	WDR43	0.305508	3.71e-06				213943_at	214662_at	WDR43	0.305508	6.12645e-05			213943_at	202471_s_at	IDH3G	-0.256028	0.000996106
	213943_at	213247_at	SVEP1	0.305281	3.77e-06				213943_at	213247_at	SVEP1	0.305281	6.21577e-05			213943_at	205734_s_at	AFF3	-0.255988	0.000997829
	213943_at	202992_at	C7	0.305209	3.8e-06				213943_at	202992_at	C7	0.305209	6.24566e-05			213943_at	218364_at	LRRFIP2	-0.255851	0.00100097
	213943_at	208396_s_at	PDE1A	0.304694	3.95e-06				213943_at	208396_s_at	PDE1A	0.304694	6.45187e-05			213943_at	220240_s_at	TMCO3	-0.255839	0.00100097
	213943_at	210220_at	FZD2	0.304438	4.03e-06				213943_at	210220_at	FZD2	0.304438	6.56216e-05			213943_at	206540_at	GLB1L	-0.255786	0.00100268
	213943_at	218847_at	IGF2BP2	0.304386	4.04e-06				213943_at	218847_at	IGF2BP2	0.304386	6.56828e-05			213943_at	213396_s_at	AKAP10	-0.25577	0.00100291
	213943_at	219315_s_at	TMEM204	0.304265	4.08e-06				213943_at	219315_s_at	TMEM204	0.304265	6.61287e-05			213943_at	202053_s_at	ALDH3A2	-0.255608	0.00101172
	213943_at	206201_s_at	MEOX2	0.304153	4.11e-06				213943_at	206201_s_at	MEOX2	0.304153	6.64103e-05			213943_at	201133_s_at	PJA2	-0.255459	0.00101965
	213943_at	218208_at	PQLC1	0.304042	4.15e-06				213943_at	218208_at	PQLC1	0.304042	6.69538e-05			213943_at	208310_s_at	C7orf28A /C7orf28B	-0.255335	0.00102475
	213943_at	202381_at	ADAM9	0.303572	4.3e-06				213943_at	202381_at	ADAM9	0.303572	6.91616e-05			213943_at	211033_s_at	PEX7	-0.255084	0.00103923
	213943_at	38671_at	PLXND1	0.303454	4.34e-06				213943_at	38671_at	PLXND1	0.303454	6.96984e-05			213943_at	208336_s_at	TECR	-0.254993	0.00104163
	213943_at	220988_s_at	AMACR/ C1QTNF3	0.303171	4.43e-06				213943_at	220988_s_at	AMACR / C1QTNF3	0.303171	7.09272e-05			213943_at	201619_at	PRDX3	-0.254986	0.00104163
	213943_at	212334_at	GNS	0.303087	4.46e-06				213943_at	212334_at	GNS	0.303087	7.1299e-05			213943_at	210058_at	MAPK13	-0.254835	0.0010508
	213943_at	201579_at	FAT1	0.302925	4.52e-06				213943_at	201579_at	FAT1	0.302925	7.18719e-05			213943_at	200695_at	PPP2R1A	-0.254786	0.00105238
	213943_at	204451_at	FZD1	0.302918	4.52e-06				213943_at	204451_at	FZD1	0.302918	7.18719e-05			213943_at	210243_s_at	B4GALT3	-0.254771	0.0010526
	213943_at	211700_s_at	TRO	0.302879	4.53e-06				213943_at	211700_s_at	TRO	0.302879	7.18719e-05			213943_at	210502_s_at	PPIE	-0.254697	0.0010567
	213943_at	208798_x_at	GOLGA8A	0.302748	4.58e-06				213943_at	208798_x_at	GOLGA8A	0.302748	7.24466e-05			213943_at	218302_at	PSENEN	-0.254624	0.00105991
	213943_at	51176_at	MED27	0.302658	4.61e-06				213943_at	51176_at	MED27	0.302658	7.28117e-05			213943_at	202204_s_at	AMFR	-0.254421	0.00107277
	213943_at	219764_at	FZD10	0.302404	4.7e-06				213943_at	219764_at	FZD10	0.302404	7.41219e-05			213943_at	212178_s_at	POM121 / POM121C	-0.254275	0.00108103
	213943_at	201464_x_at	JUN	0.302209	4.77e-06				213943_at	201464_x_at	JUN	0.302209	7.51132e-05			213943_at	213787_s_at	EBP	-0.253925	0.00110168
	213943_at	218263_s_at	ZBED5	0.302191	4.78e-06				213943_at	218263_s_at	ZBED5	0.302191	7.51582e-05			213943_at	204985_s_at	TRAPPC6A	-0.253851	0.00110514
	213943_at	222162_s_at	ADAMTS1	0.301638	4.98e-06				213943_at	222162_s_at	ADAMTS1	0.301638	7.76068e-05			213943_at	200774_at	FAM120A	-0.253728	0.00111169
	213943_at	206796_at	WISP1	0.301542	5.02e-06				213943_at	206796_at	WISP1	0.301542	7.80792e-05			213943_at	205169_at	RBBP5	-0.25372	0.00111169
	213943_at	201980_s_at	RSU1	0.301511	5.03e-06				213943_at	201980_s_at	RSU1	0.301511	7.80792e-05			213943_at	205010_at	GNL3L	-0.253674	0.00111403
	213943_at	215346_at	CD40	0.301484	5.04e-06				213943_at	215346_at	CD40	0.301484	7.80792e-05			213943_at	201544_x_at	PABPN1	-0.253654	0.00111463
	213943_at	202436_s_at	CYP1B1	0.301479	5.04e-06				213943_at	202436_s_at	CYP1B1	0.301479	7.80792e-05			213943_at	211360_s_at	ITPR2	-0.253604	0.00111637
	213943_at	219042_at	LZTS1	0.301401	5.07e-06				213943_at	219042_at	LZTS1	0.301401	7.84284e-05			213943_at	214258_x_at	KAT5	-0.253548	0.00111907
	213943_at	208986_at	TCF12	0.301195	5.15e-06				213943_at	208986_at	TCF12	0.301195	7.94323e-05			213943_at	218220_at	C12orf10	-0.253529	0.00111907
	213943_at	208845_at	VDAC3	0.301138	5.17e-06				213943_at	208845_at	VDAC3	0.301138	7.96241e-05			213943_at	205093_at	PLEKHA6	-0.253398	0.00112747
	213943_at	201061_s_at	STOM	0.301126	5.18e-06				213943_at	201061_s_at	STOM	0.301126	7.96614e-05			213943_at	217990_at	GMPR2	-0.253309	0.00113295
	213943_at	201502_s_at	NFKBIA	0.30076	5.32e-06				213943_at	201502_s_at	NFKBIA	0.30076	8.1695e-05			213943_at	213031_s_at	WDR73	-0.252815	0.00116503
	213943_at	201893_x_at	DCN	0.300726	5.34e-06				213943_at	201893_x_at	DCN	0.300726	8.18826e-05			213943_at	200990_at	TRIM28	-0.252794	0.00116522
	213943_at	206858_s_at	HOXC6	0.300663	5.36e-06				213943_at	206858_s_at	HOXC6	0.300663	8.19503e-05			213943_at	216294_s_at	KIAA1109	-0.252788	0.00116522
	213943_at	201694_s_at	EGR1	0.300622	5.38e-06				213943_at	201694_s_at	EGR1	0.300622	8.20177e-05			213943_at	205714_s_at	ZMYND10	-0.252759	0.00116645
	213943_at	37005_at	NBL1	0.300575	5.4e-06				213943_at	37005_at	NBL1	0.300575	8.22035e-05			213943_at	201511_at	AAMP	-0.252695	0.00116937
	213943_at	205383_s_at	ZBTB20	0.300255	5.53e-06				213943_at	205383_s_at	ZBTB20	0.300255	8.39395e-05			213943_at	212209_at	MED13L	-0.252411	0.00118763
	213943_at	212964_at	HIC2	0.30016	5.57e-06				213943_at	212964_at	HIC2	0.30016	8.44248e-05			213943_at	219326_s_at	B3GNT2	-0.252225	0.00120062
	213943_at	46665_at	SEMA4C	0.299985	5.64e-06				213943_at	46665_at	SEMA4C	0.299985	8.53628e-05			213943_at	219599_at	EIF4B	-0.252048	0.00121211
	213943_at	200015_s_at	SEPT2	0.299607	5.81e-06				213943_at	200015_s_at	SEPT2	0.299607	8.78095e-05			213943_at	201115_at	POLD2	-0.251551	0.00124657
	213943_at	205644_s_at	SNRPG	0.29949	5.86e-06				213943_at	205644_s_at	SNRPG	0.29949	8.84381e-05			213943_at	212018_s_at	RSL1D1	-0.251466	0.00125227
	213943_at	221832_s_at	LUZP1	0.29947	5.87e-06				213943_at	221832_s_at	LUZP1	0.29947	8.84621e-05			213943_at	203966_s_at	PPM1A	-0.25117	0.00127158
	213943_at	218706_s_at	GRAMD3	0.299143	6.01e-06				213943_at	218706_s_at	GRAMD3	0.299143	9.04423e-05			213943_at	202376_at	SERPINA3	-0.251094	0.00127586
	213943_at	214913_at	ADAMTS3	0.298808	6.17e-06				213943_at	214913_at	ADAMTS3	0.298808	9.25852e-05			213943_at	203317_at	PSD4	-0.250951	0.00128384
	213943_at	218236_s_at	PRKD3	0.298383	6.37e-06				213943_at	218236_s_at	PRKD3	0.298383	9.5179e-05			213943_at	220956_s_at	EGLN2	-0.250945	0.00128384
	213943_at	204646_at	DPYD	0.298334	6.39e-06				213943_at	204646_at	DPYD	0.298334	9.53424e-05			213943_at	203094_at	MAD2L1BP	-0.250469	0.00131551
	213943_at	202310_s_at	COL1A1	0.298144	6.48e-06				213943_at	202310_s_at	COL1A1	0.298144	9.65483e-05			213943_at	201684_s_at	TOX4	-0.250439	0.00131695
	213943_at	207016_s_at	ALDH1A2	0.297568	6.76e-06				213943_at	207016_s_at	ALDH1A2	0.297568	0.000100153			213943_at	200041_s_at	BAT1	-0.250347	0.0013226
	213943_at	51200_at	C19orf60	0.297492	6.8e-06				213943_at	51200_at	C19orf60	0.297492	0.000100604			213943_at	205232_s_at	PAFAH2	-0.250127	0.00133872
	213943_at	212653_s_at	EHBP1	0.297432	6.83e-06				213943_at	212653_s_at	EHBP1	0.297432	0.000100906			213943_at	203239_s_at	CNOT3	-0.25003	0.00134584
	213943_at	208335_s_at	DARC	0.297323	6.89e-06				213943_at	208335_s_at	DARC	0.297323	0.000101649			213943_at	203978_at	NUBP1	-0.249911	0.00135277
	213943_at	202748_at	GBP2	0.297025	7.04e-06				213943_at	202748_at	GBP2	0.297025	0.000103427			213943_at	203555_at	PTPN18	-0.24977	0.00136159
	213943_at	218980_at	FHOD3	0.296987	7.06e-06				213943_at	218980_at	FHOD3	0.296987	0.000103576			213943_at	208777_s_at	PSMD11	-0.249647	0.00136976
	213943_at	213711_at	KRT81	0.296549	7.3e-06				213943_at	213711_at	KRT81	0.296549	0.000106651			213943_at	210983_s_at	MCM7	-0.249508	0.00137979
	213943_at	212192_at	KCTD12	0.296064	7.57e-06				213943_at	212192_at	KCTD12	0.296064	0.000109833			213943_at	218365_s_at	DARS2	-0.2492	0.00140307
	213943_at	204829_s_at	FOLR2	0.295949	7.63e-06				213943_at	204829_s_at	FOLR2	0.295949	0.000110399			213943_at	218215_s_at	NR1H2	-0.249084	0.00141126
	213943_at	210139_s_at	PMP22	0.295857	7.68e-06				213943_at	210139_s_at	PMP22	0.295857	0.000110817			213943_at	218064_s_at	AKAP8L	-0.249053	0.00141292
	213943_at	206025_s_at	TNFAIP6	0.295699	7.77e-06				213943_at	206025_s_at	TNFAIP6	0.295699	0.000111963			213943_at	215807_s_at	PLXNB1	-0.248891	0.00142499
	213943_at	213451_x_at	TNXA / TNXB	0.295629	7.81e-06				213943_at	213451_x_at	TNXA / TNXB	0.295629	0.000112385			213943_at	217790_s_at	SSR3	-0.248778	0.0014339
	213943_at	60471_at	RIN3	0.295507	7.88e-06				213943_at	60471_at	RIN3	0.295507	0.000113226			213943_at	208784_s_at	KLHDC3	-0.24876	0.00143427
	213943_at	210986_s_at	TPM1	0.295495	7.89e-06				213943_at	210986_s_at	TPM1	0.295495	0.000113226			213943_at	206325_at	SERPINA6	-0.248727	0.00143427
	213943_at	203373_at	SOCS2	0.295436	7.93e-06				213943_at	203373_at	SOCS2	0.295436	0.000113645			213943_at	200789_at	ECH1	-0.248624	0.00144178
	213943_at	222000_at	C1orf174	0.29516	8.09e-06				213943_at	222000_at	C1orf174	0.29516	0.000115609			213943_at	64440_at	IL17RC	-0.24849	0.00145116
	213943_at	203269_at	NSMAF	0.295136	8.1e-06				213943_at	203269_at	NSMAF	0.295136	0.000115609			213943_at	209440_at	PRPS1	-0.248229	0.00147249
	213943_at	202888_s_at	ANPEP	0.294993	8.19e-06				213943_at	202888_s_at	ANPEP	0.294993	0.000116735			213943_at	218133_s_at	NIF3L1	-0.248135	0.00147994
	213943_at	212959_s_at	GNPTAB	0.294907	8.24e-06				213943_at	212959_s_at	GNPTAB	0.294907	0.000117289			213943_at	200052_s_at	ILF2	-0.248054	0.00148624
	213943_at	204223_at	PRELP	0.294806	8.3e-06				213943_at	204223_at	PRELP	0.294806	0.000117824			213943_at	37831_at	SIPA1L3	-0.247745	0.00151142
	213943_at	206157_at	PTX3	0.294639	8.41e-06				213943_at	206157_at	PTX3	0.294639	0.000119225			213943_at	204258_at	CHD1	-0.247453	0.00153763
	213943_at	212509_s_at	MXRA7	0.294558	8.46e-06				213943_at	212509_s_at	MXRA7	0.294558	0.000119772			213943_at	209520_s_at	NCBP1	-0.247389	0.00154258
	213943_at	212423_at	ZCCHC24	0.294421	8.54e-06				213943_at	212423_at	ZCCHC24	0.294421	0.000120742			213943_at	205662_at	B9D1	-0.247304	0.00154915
	213943_at	200674_s_at	RPL32	0.293991	8.82e-06				213943_at	200674_s_at	RPL32	0.293991	0.000123539			213943_at	217983_s_at	RNASET2	-0.247296	0.00154915
	213943_at	209654_at	KIAA0947	0.293941	8.85e-06				213943_at	209654_at	KIAA0947	0.293941	0.000123794			213943_at	218324_s_at	SPATS2	-0.246914	0.00158125
	213943_at	219432_at	EVC	0.293771	8.96e-06				213943_at	219432_at	EVC	0.293771	0.000125			213943_at	218026_at	CCDC56	-0.246856	0.00158343
	213943_at	218802_at	CCDC109B	0.293771	8.96e-06				213943_at	218802_at	CCDC109B	0.293771	0.000125			213943_at	203383_s_at	GOLGA1	-0.246785	0.00158808
	213943_at	205907_s_at	OMD	0.293484	9.15e-06				213943_at	205907_s_at	OMD	0.293484	0.000127313			213943_at	203943_at	KIF3B	-0.246768	0.0015886
	213943_at	219463_at	C20orf103	0.293059	9.44e-06				213943_at	219463_at	C20orf103	0.293059	0.000130657			213943_at	209417_s_at	IFI35	-0.246625	0.00159916
	213943_at	37028_at	PPP1R15A	0.292922	9.54e-06				213943_at	37028_at	PPP1R15A	0.292922	0.000131695			213943_at	218976_at	DNAJC12	-0.246573	0.00160312
	213943_at	203797_at	VSNL1	0.292829	9.6e-06				213943_at	203797_at	VSNL1	0.292829	0.000132349			213943_at	206992_s_at	ATP5S	-0.246559	0.00160332
	213943_at	213217_at	ADCY2	0.292723	9.68e-06				213943_at	213217_at	ADCY2	0.292723	0.000133277			213943_at	209449_at	LSM2	-0.246488	0.00160808
	213943_at	204793_at	GPRASP1	0.292124	1.01e-05				213943_at	204793_at	GPRASP1	0.292124	0.000138336			213943_at	206132_at	MCC	-0.246212	0.00163299
	213943_at	202442_at	AP3S1	0.292	1.02e-05				213943_at	202442_at	AP3S1	0.292	0.000139524			213943_at	218582_at	2005-03-01	-0.246018	0.00165124
	213943_at	208398_s_at	TBPL1	0.291896	1.03e-05				213943_at	208398_s_at	TBPL1	0.291896	0.000140526			213943_at	91816_f_at	MEX3D	-0.245965	0.00165426
	213943_at	209839_at	DNM3	0.291828	1.03e-05				213943_at	209839_at	DNM3	0.291828	0.000140526			213943_at	205851_at	NME6	-0.24593	0.00165594
	213943_at	205327_s_at	ACVR2A	0.291708	1.04e-05				213943_at	205327_s_at	ACVR2A	0.291708	0.000141707			213943_at	221428_s_at	TBL1XR1	-0.245925	0.00165594
	213943_at	201934_at	WDR82	0.291603	1.05e-05				213943_at	201934_at	WDR82	0.291603	0.0001427			213943_at	211780_x_at	DCTN1	-0.245803	0.00166594
	213943_at	205522_at	HOXD4	0.290932	1.1e-05				213943_at	205522_at	HOXD4	0.290932	0.000148345			213943_at	219581_at	TSEN2	-0.245538	0.00168942
	213943_at	204844_at	ENPEP	0.290584	1.13e-05				213943_at	204844_at	ENPEP	0.290584	0.00015142			213943_at	219125_s_at	RAG1AP1	-0.245357	0.00170451
	213943_at	221737_at	GNA12	0.290459	1.14e-05				213943_at	221737_at	GNA12	0.290459	0.000152566			213943_at	221519_at	FBXW4	-0.245042	0.00173265
	213943_at	214003_x_at	RPS20	0.289907	1.19e-05				213943_at	214003_x_at	RPS20	0.289907	0.000158451			213943_at	203608_at	ALDH5A1	-0.244919	0.00174304
	213943_at	202075_s_at	PLTP	0.289871	1.19e-05				213943_at	202075_s_at	PLTP	0.289871	0.000158451			213943_at	201066_at	CYC1	-0.244866	0.00174742
	213943_at	205941_s_at	COL10A1	0.289824	1.2e-05				213943_at	205941_s_at	COL10A1	0.289824	0.00015958			213943_at	204275_at	SOLH	-0.244717	0.0017621
	213943_at	52164_at	C11orf24	0.289619	1.21e-05				213943_at	52164_at	C11orf24	0.289619	0.000160504			213943_at	203368_at	CRELD1	-0.244534	0.00177547
	213943_at	210432_s_at	SCN3A	0.289426	1.23e-05				213943_at	210432_s_at	SCN3A	0.289426	0.000162952			213943_at	221041_s_at	SLC17A5	-0.244408	0.00178552
	213943_at	217028_at	CXCR4	0.289345	1.24e-05				213943_at	217028_at	CXCR4	0.289345	0.00016407			213943_at	217930_s_at	TOLLIP	-0.244148	0.00180874
	213943_at	203336_s_at	ITGB1BP1	0.289246	1.25e-05				213943_at	203336_s_at	ITGB1BP1	0.289246	0.000165185			213943_at	212744_at	BBS4	-0.244042	0.00181901
	213943_at	206772_at	PTH2R	0.288826	1.28e-05				213943_at	206772_at	PTH2R	0.288826	0.000168094			213943_at	203992_s_at	KDM6A	-0.24398	0.00182378
	213943_at	219855_at	NUDT11	0.288628	1.3e-05				213943_at	219855_at	NUDT11	0.288628	0.000170295			213943_at	220338_at	RALGPS2	-0.243905	0.00183038
	213943_at	202609_at	EPS8	0.288467	1.32e-05				213943_at	202609_at	EPS8	0.288467	0.000171845			213943_at	201773_at	ADNP	-0.243867	0.00183333
	213943_at	208475_at	FRMD4A	0.288452	1.32e-05				213943_at	208475_at	FRMD4A	0.288452	0.000171845			213943_at	208313_s_at	SF1	-0.24339	0.00188557
	213943_at	202363_at	SPOCK1	0.288288	1.34e-05				213943_at	202363_at	SPOCK1	0.288288	0.000174233			213943_at	202045_s_at	GRLF1	-0.243137	0.00190528
	213943_at	205844_at	VNN1	0.288173	1.35e-05				213943_at	205844_at	VNN1	0.288173	0.0001751			213943_at	212968_at	RFNG	-0.243059	0.00191163
	213943_at	209763_at	CHRDL1	0.288156	1.35e-05				213943_at	209763_at	CHRDL1	0.288156	0.0001751			213943_at	204202_at	IQCE	-0.242944	0.0019236
	213943_at	210453_x_at	ATP5L	0.287896	1.37e-05				213943_at	210453_x_at	ATP5L	0.287896	0.000177257			213943_at	202261_at	VPS72	-0.242764	0.0019432
	213943_at	219064_at	ITIH5	0.287793	1.38e-05				213943_at	219064_at	ITIH5	0.287793	0.000178332			213943_at	212518_at	PIP5K1C	-0.242477	0.00197021
	213943_at	217528_at	CLCA2	0.2876	1.4e-05				213943_at	217528_at	CLCA2	0.2876	0.000180694			213943_at	204765_at	ARHGEF5	-0.242387	0.00197829
	213943_at	202076_at	BIRC2	0.287402	1.42e-05				213943_at	202076_at	BIRC2	0.287402	0.000182827			213943_at	206445_s_at	PRMT1	-0.242296	0.00198635
	213943_at	213506_at	F2RL1	0.287374	1.43e-05				213943_at	213506_at	F2RL1	0.287374	0.000183441			213943_at	209104_s_at	NHP2	-0.241842	0.0020302
	213943_at	209717_at	EVI5	0.287351	1.43e-05				213943_at	209717_at	EVI5	0.287351	0.000183441			213943_at	218405_at	ABT1	-0.24183	0.00203025
	213943_at	209493_at	PDZD2	0.286404	1.53e-05				213943_at	209493_at	PDZD2	0.286404	0.000195554			213943_at	201015_s_at	JUP	-0.2418	0.00203244
	213943_at	204089_x_at	MAP3K4	0.28628	1.54e-05				213943_at	204089_x_at	MAP3K4	0.28628	0.000196593			213943_at	201945_at	FURIN	-0.241706	0.00204259
	213943_at	211005_at	LAT / SPNS1	0.285907	1.58e-05				213943_at	211005_at	LAT / SPNS1	0.285907	0.000200483			213943_at	201349_at	SLC9A3R1	-0.241394	0.00207122
	213943_at	200999_s_at	CKAP4	0.285325	1.65e-05				213943_at	200999_s_at	CKAP4	0.285325	0.00020861			213943_at	212908_at	DNAJC16	-0.241395	0.00207122
	213943_at	203879_at	PIK3CD	0.285267	1.66e-05				213943_at	203879_at	PIK3CD	0.285267	0.000209371			213943_at	212961_x_at	CXorf40B	-0.241246	0.00208823
	213943_at	216210_x_at	TRIOBP	0.285261	1.66e-05				213943_at	216210_x_at	TRIOBP	0.285261	0.000209371			213943_at	213145_at	FBXL14	-0.241065	0.00210818
	213943_at	209900_s_at	SLC16A1	0.284947	1.7e-05				213943_at	209900_s_at	SLC16A1	0.284947	0.000212885			213943_at	218328_at	COQ4	-0.240992	0.0021151
	213943_at	204259_at	MMP7	0.284931	1.7e-05				213943_at	204259_at	MMP7	0.284931	0.000212885			213943_at	201481_s_at	PYGB	-0.24087	0.00212707
	213943_at	217757_at	A2M	0.284929	1.7e-05				213943_at	217757_at	A2M	0.284929	0.000212885			213943_at	221103_s_at	WDR52	-0.240809	0.00213196
	213943_at	202998_s_at	LOXL2	0.284917	1.7e-05				213943_at	202998_s_at	LOXL2	0.284917	0.000212885			213943_at	200652_at	SSR2	-0.240698	0.00214475
	213943_at	212624_s_at	CHN1	0.284757	1.72e-05				213943_at	212624_s_at	CHN1	0.284757	0.000214368			213943_at	218347_at	TYW1	-0.240674	0.00214627
	213943_at	212134_at	PHLDB1	0.284749	1.72e-05				213943_at	212134_at	PHLDB1	0.284749	0.000214368			213943_at	217955_at	BCL2L13	-0.240622	0.00215015
	213943_at	208891_at	DUSP6	0.284693	1.73e-05				213943_at	208891_at	DUSP6	0.284693	0.000215359			213943_at	220089_at	L2HGDH	-0.240584	0.00215348
	213943_at	202878_s_at	CD93	0.284626	1.74e-05				213943_at	202878_s_at	CD93	0.284626	0.000216348			213943_at	217808_s_at	MAPKAP1	-0.240558	0.00215541
	213943_at	205648_at	WNT2	0.284396	1.76e-05				213943_at	205648_at	WNT2	0.284396	0.000218577			213943_at	201188_s_at	ITPR3	-0.24033	0.00218341
	213943_at	212886_at	CCDC69	0.284383	1.77e-05				213943_at	212886_at	CCDC69	0.284383	0.000219559			213943_at	206037_at	CCBL1	-0.240243	0.0021933
	213943_at	213881_x_at	SUMO2	0.284203	1.79e-05				213943_at	213881_x_at	SUMO2	0.284203	0.000221518			213943_at	201819_at	SCARB1	-0.240176	0.00220052
	213943_at	205904_at	MICA	0.283494	1.88e-05				213943_at	205904_at	MICA	0.283494	0.000231566			213943_at	221050_s_at	GTPBP2	-0.240077	0.00221102
	213943_at	214696_at	C17orf91	0.283469	1.88e-05				213943_at	214696_at	C17orf91	0.283469	0.000231566			213943_at	222192_s_at	C2orf43	-0.239988	0.00221939
	213943_at	203780_at	MPZL2	0.283235	1.92e-05				213943_at	203780_at	MPZL2	0.283235	0.000235665			213943_at	91703_at	EHBP1L1	-0.239941	0.0022242
	213943_at	211597_s_at	HOPX	0.283178	1.92e-05				213943_at	211597_s_at	HOPX	0.283178	0.000235665			213943_at	218419_s_at	TMUB2	-0.239829	0.00223468
	213943_at	208581_x_at	MT1X	0.282653	2e-05				213943_at	208581_x_at	MT1X	0.282653	0.000244344			213943_at	221652_s_at	C12orf11	-0.23962	0.00226103
	213943_at	213134_x_at	BTG3	0.282467	2.02e-05				213943_at	213134_x_at	BTG3	0.282467	0.000245646			213943_at	218474_s_at	KCTD5	-0.239384	0.00228684
	213943_at	203440_at	CDH2	0.282463	2.02e-05				213943_at	203440_at	CDH2	0.282463	0.000245646			213943_at	212400_at	FAM102A	-0.239221	0.002306
	213943_at	212655_at	ZCCHC14	0.282457	2.02e-05				213943_at	212655_at	ZCCHC14	0.282457	0.000245646			213943_at	219382_at	SERTAD3	-0.238989	0.0023348
	213943_at	200872_at	S100A10	0.282116	2.07e-05				213943_at	200872_at	S100A10	0.282116	0.000250856			213943_at	203630_s_at	COG5	-0.238923	0.00234086
	213943_at	219779_at	ZFHX4	0.281981	2.09e-05				213943_at	219779_at	ZFHX4	0.281981	0.000252698			213943_at	218165_at	MEAF6	-0.238674	0.0023707
	213943_at	202522_at	PITPNB	0.281916	2.1e-05				213943_at	202522_at	PITPNB	0.281916	0.000253615			213943_at	220417_s_at	THAP4	-0.23867	0.0023707
	213943_at	201389_at	ITGA5	0.281797	2.12e-05				213943_at	201389_at	ITGA5	0.281797	0.000255444			213943_at	208006_at	FOXI1	-0.238665	0.0023707
	213943_at	209308_s_at	BNIP2	0.281666	2.14e-05				213943_at	209308_s_at	BNIP2	0.281666	0.000257265			213943_at	203511_s_at	TRAPPC3	-0.23853	0.00238646
	213943_at	204030_s_at	SCHIP1	0.281355	2.19e-05				213943_at	204030_s_at	SCHIP1	0.281355	0.000262376			213943_at	200666_s_at	DNAJB1	-0.238505	0.00238848
	213943_at	204688_at	SGCE	0.281354	2.19e-05				213943_at	204688_at	SGCE	0.281354	0.000262376			213943_at	212692_s_at	LRBA	-0.238203	0.00242204
	213943_at	206461_x_at	MT1H	0.280857	2.26e-05				213943_at	206461_x_at	MT1H	0.280857	0.000270454			213943_at	219219_at	TMEM160	-0.238202	0.00242204
	213943_at	204823_at	NAV3	0.28073	2.28e-05				213943_at	204823_at	NAV3	0.28073	0.000272228			213943_at	209309_at	AZGP1	-0.238105	0.00243272
	213943_at	221658_s_at	IL21R	0.280652	2.3e-05				213943_at	221658_s_at	IL21R	0.280652	0.000273994			213943_at	220261_s_at	ZDHHC4	-0.238029	0.00244208
	213943_at	206343_s_at	NRG1	0.280622	2.3e-05				213943_at	206343_s_at	NRG1	0.280622	0.000273994			213943_at	212261_at	GIGYF2	-0.237982	0.00244732
	213943_at	212185_x_at	MT2A	0.280333	2.35e-05				213943_at	212185_x_at	MT2A	0.280333	0.000279318			213943_at	218903_s_at	OBFC2B	-0.237852	0.00246459
	213943_at	219838_at	TTC23	0.280191	2.37e-05				213943_at	219838_at	TTC23	0.280191	0.00028106			213943_at	218197_s_at	OXR1	-0.23784	0.00246463
	213943_at	207177_at	PTGFR	0.280153	2.38e-05				213943_at	207177_at	PTGFR	0.280153	0.000281928			213943_at	221267_s_at	FAM108A1	-0.237824	0.00246535
	213943_at	209897_s_at	SLIT2	0.280102	2.39e-05				213943_at	209897_s_at	SLIT2	0.280102	0.000282477			213943_at	219384_s_at	ADAT1	-0.237639	0.00248913
	213943_at	209542_x_at	IGF1	0.279909	2.42e-05				213943_at	209542_x_at	IGF1	0.279909	0.000284424			213943_at	210014_x_at	IDH3B	-0.237514	0.00250442
	213943_at	200019_s_at	FAU	0.279904	2.42e-05				213943_at	200019_s_at	FAU	0.279904	0.000284424			213943_at	218097_s_at	CUEDC2	-0.237175	0.00255133
	213943_at	214143_x_at	RPL24	0.279704	2.45e-05				213943_at	214143_x_at	RPL24	0.279704	0.000287308			213943_at	219499_at	SEC61A2	-0.237163	0.00255159
	213943_at	210809_s_at	POSTN	0.279605	2.47e-05				213943_at	210809_s_at	POSTN	0.279605	0.000289009			213943_at	217942_at	MRPS35	-0.237068	0.00256419
	213943_at	205478_at	PPP1R1A	0.279587	2.47e-05				213943_at	205478_at	PPP1R1A	0.279587	0.000289009			213943_at	203188_at	B3GNT1	-0.236987	0.00257404
	213943_at	201983_s_at	EGFR	0.279272	2.53e-05				213943_at	201983_s_at	EGFR	0.279272	0.000295373			213943_at	205019_s_at	VIPR1	-0.236981	0.00257404
	213943_at	205579_at	HRH1	0.279251	2.53e-05				213943_at	205579_at	HRH1	0.279251	0.000295373			213943_at	202092_s_at	ARL2BP	-0.236918	0.0025802
	213943_at	200054_at	ZNF259	0.279187	2.54e-05				213943_at	200054_at	ZNF259	0.279187	0.000295556			213943_at	218494_s_at	SLC2A4RG	-0.23673	0.00260541
	213943_at	218824_at	PNMAL1	0.279181	2.54e-05				213943_at	218824_at	PNMAL1	0.279181	0.000295556			213943_at	210239_at	IRX5	-0.236648	0.00261308
	213943_at	213588_x_at	RPL14	0.27911	2.56e-05				213943_at	213588_x_at	RPL14	0.27911	0.000297554			213943_at	212051_at	WIPF2	-0.236565	0.00262409
	213943_at	203510_at	MET	0.278874	2.6e-05				213943_at	203510_at	MET	0.278874	0.000301205			213943_at	203195_s_at	NUP98	-0.236456	0.00263925
	213943_at	202432_at	PPP3CB	0.278541	2.66e-05				213943_at	202432_at	PPP3CB	0.278541	0.000307141			213943_at	200065_s_at	ARF1	-0.236159	0.0026769
	213943_at	213147_at	HOXA10	0.278354	2.7e-05				213943_at	213147_at	HOXA10	0.278354	0.000311418			213943_at	203628_at	IGF1R	-0.236057	0.00268946
	213943_at	217719_at	EIF3L	0.278245	2.72e-05				213943_at	217719_at	EIF3L	0.278245	0.000313381			213943_at	202300_at	HBXIP	-0.235671	0.00274552
	213943_at	202723_s_at	FOXO1	0.27818	2.73e-05				213943_at	202723_s_at	FOXO1	0.27818	0.000313846			213943_at	212378_at	GART	-0.235645	0.00274751
	213943_at	203887_s_at	THBD	0.278058	2.75e-05				213943_at	203887_s_at	THBD	0.278058	0.000315455			213943_at	212036_s_at	PNN	-0.235637	0.00274751
	213943_at	201426_s_at	VIM	0.277804	2.8e-05				213943_at	201426_s_at	VIM	0.277804	0.000318413			213943_at	201471_s_at	SQSTM1	-0.235593	0.0027511
	213943_at	202693_s_at	STK17A	0.277491	2.86e-05				213943_at	202693_s_at	STK17A	0.277491	0.000324534			213943_at	202945_at	FPGS	-0.23544	0.0027704
	213943_at	203232_s_at	ATXN1	0.277405	2.88e-05				213943_at	203232_s_at	ATXN1	0.277405	0.0003254			213943_at	217080_s_at	HOMER2	-0.235412	0.00277142
	213943_at	203651_at	ZFYVE16	0.277381	2.88e-05				213943_at	203651_at	ZFYVE16	0.277381	0.0003254			213943_at	207801_s_at	RNF10	-0.235332	0.00278013
	213943_at	212543_at	AIM1	0.277371	2.88e-05				213943_at	212543_at	AIM1	0.277371	0.0003254			213943_at	210117_at	SPAG1	-0.235326	0.00278013
	213943_at	218877_s_at	TRMT11	0.277363	2.89e-05				213943_at	218877_s_at	TRMT11	0.277363	0.00032583			213943_at	210627_s_at	MOGS	-0.235277	0.00278538
	213943_at	219257_s_at	SPHK1	0.277363	2.89e-05				213943_at	219257_s_at	SPHK1	0.277363	0.00032583			213943_at	219696_at	DENND1B	-0.235191	0.00279675
	213943_at	213737_x_at	GOLGA8C/GOLGA8D	0.277274	2.9e-05				213943_at	213737_x_at	GOLGA8C /GOLGA8D	0.277274	0.000326607			213943_at	219922_s_at	LTBP3	-0.235178	0.00279711
	213943_at	204786_s_at	IFNAR2	0.277048	2.95e-05				213943_at	204786_s_at	IFNAR2	0.277048	0.000330821			213943_at	218291_at	ROBLD3	-0.235109	0.00280661
	213943_at	222001_x_at	LOC728855	0.276968	2.97e-05				213943_at	222001_x_at	LOC728855	0.276968	0.00033271			213943_at	207391_s_at	PIP5K1A	-0.234516	0.00289593
	213943_at	202451_at	GTF2H1	0.276694	3.02e-05				213943_at	202451_at	GTF2H1	0.276694	0.000337951			213943_at	221220_s_at	SCYL2	-0.23436	0.00291868
	213943_at	218927_s_at	CHST12	0.276604	3.04e-05				213943_at	218927_s_at	CHST12	0.276604	0.000339827			213943_at	203521_s_at	ZNF318	-0.234309	0.00292358
	213943_at	205395_s_at	MRE11A	0.276568	3.05e-05				213943_at	205395_s_at	MRE11A	0.276568	0.000340583			213943_at	208829_at	TAPBP	-0.234298	0.00292373
	213943_at	221911_at	ETV1	0.276492	3.06e-05				213943_at	221911_at	ETV1	0.276492	0.000341338			213943_at	205606_at	LRP6	-0.234273	0.00292611
	213943_at	209492_x_at	ATP5I	0.276292	3.11e-05				213943_at	209492_x_at	ATP5I	0.276292	0.000345815			213943_at	200682_s_at	UBE2L3	-0.234259	0.00292665
	213943_at	205849_s_at	UQCRB	0.276123	3.14e-05				213943_at	205849_s_at	UQCRB	0.276123	0.000348782			213943_at	208652_at	PPP2CA	-0.23419	0.00293468
	213943_at	209045_at	XPNPEP1	0.275768	3.22e-05				213943_at	209045_at	XPNPEP1	0.275768	0.000357291			213943_at	208916_at	SLC1A5	-0.23401	0.00295382
	213943_at	211071_s_at	MLLT11	0.275551	3.27e-05				213943_at	211071_s_at	MLLT11	0.275551	0.000362457			213943_at	218275_at	SLC25A10	-0.234009	0.00295382
	213943_at	212465_at	SETD3	0.275513	3.28e-05				213943_at	212465_at	SETD3	0.275513	0.000363182			213943_at	221432_s_at	SLC25A28	-0.233918	0.00296649
	213943_at	210024_s_at	UBE2E3	0.275055	3.38e-05				213943_at	210024_s_at	UBE2E3	0.275055	0.00037184			213943_at	207998_s_at	CACNA1D	-0.233868	0.00296813
	213943_at	209710_at	GATA2	0.275044	3.39e-05				213943_at	209710_at	GATA2	0.275044	0.00037184			213943_at	201755_at	MCM5	-0.233777	0.00297785
	213943_at	210657_s_at	SEPT4	0.275024	3.39e-05				213943_at	210657_s_at	SEPT4	0.275024	0.00037184			213943_at	207163_s_at	AKT1	-0.233426	0.00302963
	213943_at	212226_s_at	PPAP2B	0.27498	3.4e-05				213943_at	212226_s_at	PPAP2B	0.27498	0.000372548			213943_at	210007_s_at	GPD2	-0.233405	0.00303152
	213943_at	203813_s_at	SLIT3	0.274918	3.41e-05				213943_at	203813_s_at	SLIT3	0.274918	0.000373255			213943_at	219717_at	DCAF16	-0.233261	0.00305303
	213943_at	201272_at	AKR1B1	0.274522	3.51e-05				213943_at	201272_at	AKR1B1	0.274522	0.000381817			213943_at	216766_at	PRKCE	-0.233212	0.00305983
	213943_at	219511_s_at	SNCAIP	0.274432	3.53e-05				213943_at	219511_s_at	SNCAIP	0.274432	0.000383596			213943_at	219929_s_at	ZFYVE21	-0.233174	0.00306467
	213943_at	213857_s_at	CD47	0.274356	3.55e-05				213943_at	213857_s_at	CD47	0.274356	0.000384974			213943_at	201500_s_at	PPP1R11	-0.233138	0.00306925
	213943_at	201063_at	RCN1	0.274072	3.62e-05				213943_at	201063_at	RCN1	0.274072	0.000391354			213943_at	209239_at	NFKB1	-0.233107	0.0030709
	213943_at	204904_at	GJA4	0.273994	3.64e-05				213943_at	204904_at	GJA4	0.273994	0.000393113			213943_at	52940_at	LOC100294402 / SIGIRR	-0.233096	0.00307095
	213943_at	204310_s_at	NPR2	0.273817	3.68e-05				213943_at	204310_s_at	NPR2	0.273817	0.000397025			213943_at	204160_s_at	ENPP4	-0.233076	0.00307255
	213943_at	49452_at	ACACB	0.27378	3.69e-05				213943_at	49452_at	ACACB	0.27378	0.000397696			213943_at	212742_at	RNF115	-0.233032	0.00307853
	213943_at	205249_at	EGR2	0.27371	3.71e-05				213943_at	205249_at	EGR2	0.27371	0.000399442			213943_at	220386_s_at	EML4	-0.232532	0.00315891
	213943_at	204154_at	CDO1	0.273421	3.78e-05				213943_at	204154_at	CDO1	0.273421	0.000405733			213943_at	36566_at	CTNS	-0.232517	0.00315968
	213943_at	219310_at	TMEM90B	0.273407	3.79e-05				213943_at	219310_at	TMEM90B	0.273407	0.000406392			213943_at	203803_at	PCYOX1	-0.232335	0.00318528
	213943_at	209409_at	GRB10	0.27335	3.8e-05				213943_at	209409_at	GRB10	0.27335	0.000407049			213943_at	218292_s_at	PRKAG2	-0.232278	0.00319356
	213943_at	204865_at	CA3	0.27326	3.82e-05				213943_at	204865_at	CA3	0.27326	0.000408775			213943_at	214433_s_at	SELENBP1	-0.232192	0.00320125
	213943_at	202345_s_at	FABP5	0.273143	3.85e-05				213943_at	202345_s_at	FABP5	0.273143	0.000411567			213943_at	218733_at	MSL2	-0.231698	0.00327817
	213943_at	47069_at	ARHGAP8 / PRR5	0.273114	3.86e-05				213943_at	47069_at	ARHGAP8 / PRR5	0.273114	0.000411799			213943_at	221618_s_at	TAF9B	-0.231542	0.00330552
	213943_at	212851_at	DCUN1D4	0.272918	3.91e-05				213943_at	212851_at	DCUN1D4	0.272918	0.000416288			213943_at	205141_at	ANG	-0.231002	0.00339096
	213943_at	210002_at	GATA6	0.272886	3.92e-05				213943_at	210002_at	GATA6	0.272886	0.00041651			213943_at	206043_s_at	ATP2C2	-0.230775	0.00342267
	213943_at	204647_at	HOMER3	0.272596	4e-05				213943_at	204647_at	HOMER3	0.272596	0.000422874			213943_at	218460_at	HEATR2	-0.230766	0.00342267
	213943_at	220504_at	KERA	0.272393	4.05e-05				213943_at	220504_at	KERA	0.272393	0.000427301			213943_at	212038_s_at	VDAC1	-0.230631	0.00344315
	213943_at	214598_at	CLDN8	0.272131	4.13e-05				213943_at	214598_at	CLDN8	0.272131	0.000434001			213943_at	205776_at	FMO5	-0.230538	0.00345723
	213943_at	204131_s_at	FOXO3	0.272053	4.15e-05				213943_at	204131_s_at	FOXO3	0.272053	0.000435233			213943_at	212388_at	USP24	-0.230521	0.00345843
	213943_at	204400_at	EFS	0.271963	4.17e-05				213943_at	204400_at	EFS	0.271963	0.000436895			213943_at	220773_s_at	GPHN	-0.230466	0.00346464
	213943_at	211726_s_at	FMO2	0.271872	4.2e-05				213943_at	211726_s_at	FMO2	0.271872	0.0004396			213943_at	212341_at	YIPF6	-0.230388	0.00347452
	213943_at	219386_s_at	SLAMF8	0.271685	4.25e-05				213943_at	219386_s_at	SLAMF8	0.271685	0.00044395			213943_at	202308_at	SREBF1	-0.230309	0.00348819
	213943_at	218845_at	DUSP22	0.271614	4.27e-05				213943_at	218845_at	DUSP22	0.271614	0.000445597			213943_at	219345_at	BOLA1	-0.230147	0.00351331
	213943_at	207031_at	NKX3-2	0.271224	4.39e-05				213943_at	207031_at	NKX3-2	0.271224	0.000456308			213943_at	212638_s_at	WWP1	-0.230142	0.00351331
	213943_at	203765_at	GCA	0.270899	4.49e-05				213943_at	203765_at	GCA	0.270899	0.000464408			213943_at	212660_at	PHF15	-0.230084	0.00352268
	213943_at	201655_s_at	HSPG2	0.270844	4.5e-05				213943_at	201655_s_at	HSPG2	0.270844	0.000464529			213943_at	220622_at	LRRC31	-0.230054	0.0035267
	213943_at	200025_s_at	RPL27	0.270838	4.5e-05				213943_at	200025_s_at	RPL27	0.270838	0.000464529			213943_at	201360_at	CST3	-0.230018	0.00353182
	213943_at	200091_s_at	RPS25	0.270743	4.53e-05				213943_at	200091_s_at	RPS25	0.270743	0.000465797			213943_at	216733_s_at	GATM	-0.229707	0.00358651
	213943_at	214920_at	THSD7A	0.2707	4.55e-05				213943_at	214920_at	THSD7A	0.2707	0.000466941			213943_at	208932_at	PPP4C	-0.229624	0.00359926
	213943_at	221004_s_at	ITM2C	0.270493	4.61e-05				213943_at	221004_s_at	ITM2C	0.270493	0.000472177			213943_at	201005_at	CD9	-0.229403	0.00364056
	213943_at	204337_at	RGS4	0.270415	4.63e-05				213943_at	204337_at	RGS4	0.270415	0.000473764			213943_at	209416_s_at	FZR1	-0.229357	0.0036458
	213943_at	213564_x_at	LDHB	0.270159	4.71e-05				213943_at	213564_x_at	LDHB	0.270159	0.000480548			213943_at	202764_at	STIM1	-0.229266	0.00366029
	213943_at	205987_at	CD1C	0.270069	4.74e-05				213943_at	205987_at	CD1C	0.270069	0.000482206			213943_at	210958_s_at	MAST4	-0.229241	0.00366345
	213943_at	209955_s_at	FAP	0.269899	4.8e-05				213943_at	209955_s_at	FAP	0.269899	0.000486428			213943_at	201613_s_at	AP1G2	-0.229056	0.00369773
	213943_at	204254_s_at	VDR	0.269676	4.87e-05				213943_at	204254_s_at	VDR	0.269676	0.000491627			213943_at	212199_at	MRFAP1L1	-0.228933	0.00371926
	213943_at	204220_at	GMFG	0.269606	4.89e-05				213943_at	204220_at	GMFG	0.269606	0.000492229			213943_at	201122_x_at	EIF5A	-0.228759	0.00375167
	213943_at	203414_at	MMD	0.269481	4.93e-05				213943_at	203414_at	MMD	0.269481	0.000495307			213943_at	220183_s_at	NUDT6	-0.228261	0.00384814
	213943_at	209781_s_at	KHDRBS3	0.269367	4.97e-05				213943_at	209781_s_at	KHDRBS3	0.269367	0.00049885			213943_at	201614_s_at	RUVBL1	-0.228259	0.00384814
	213943_at	204677_at	CDH5	0.26924	5.01e-05				213943_at	204677_at	CDH5	0.26924	0.000502385			213943_at	209998_at	PIGO	-0.228067	0.00387938
	213943_at	214068_at	BEAN	0.269204	5.03e-05				213943_at	214068_at	BEAN	0.269204	0.00050391			213943_at	206754_s_at	CYP2B6 / CYP2B7P1	-0.228065	0.00387938
	213943_at	205361_s_at	PFDN4	0.269025	5.09e-05				213943_at	205361_s_at	PFDN4	0.269025	0.000509436			213943_at	208083_s_at	ITGB6	-0.227958	0.00389593
	213943_at	200026_at	RPL34	0.268647	5.22e-05				213943_at	200026_at	RPL34	0.268647	0.000521455			213943_at	202546_at	VAMP8	-0.227907	0.00390281
	213943_at	204017_at	KDELR3	0.26864	5.22e-05				213943_at	204017_at	KDELR3	0.26864	0.000521455			213943_at	205223_at	DEPDC5	-0.227897	0.00390281
	213943_at	213338_at	TMEM158	0.268423	5.3e-05				213943_at	213338_at	TMEM158	0.268423	0.000527942			213943_at	203573_s_at	RABGGTA	-0.227655	0.00394487
	213943_at	201059_at	CTTN	0.268343	5.32e-05				213943_at	201059_at	CTTN	0.268343	0.000529433			213943_at	217927_at	SPCS1	-0.227641	0.00394587
	213943_at	221775_x_at	RPL22	0.268338	5.33e-05				213943_at	221775_x_at	RPL22	0.268338	0.000529927			213943_at	218400_at	OAS3	-0.227568	0.00395965
	213943_at	221215_s_at	RIPK4	0.268219	5.37e-05				213943_at	221215_s_at	RIPK4	0.268219	0.000532897			213943_at	203229_s_at	CLK2	-0.227507	0.00396635
	213943_at	209798_at	NPAT	0.267897	5.48e-05				213943_at	209798_at	NPAT	0.267897	0.000542278			213943_at	200854_at	NCOR1	-0.227498	0.00396635
	213943_at	201368_at	ZFP36L2	0.267823	5.51e-05				213943_at	201368_at	ZFP36L2	0.267823	0.000544699			213943_at	203674_at	HELZ	-0.22738	0.00398586
	213943_at	202973_x_at	FAM13A	0.267799	5.52e-05				213943_at	202973_x_at	FAM13A	0.267799	0.000544699			213943_at	205634_x_at	ZDHHC24	-0.227319	0.00399734
	213943_at	201645_at	TNC	0.267631	5.58e-05				213943_at	201645_at	TNC	0.267631	0.000548561			213943_at	209411_s_at	GGA3	-0.227301	0.00399915
	213943_at	219478_at	WFDC1	0.267479	5.64e-05				213943_at	219478_at	WFDC1	0.267479	0.000552394			213943_at	201095_at	DAP	-0.227257	0.00400445
	213943_at	216620_s_at	ARHGEF10	0.267476	5.64e-05				213943_at	216620_s_at	ARHGEF10	0.267476	0.000552394			213943_at	205879_x_at	RET	-0.227244	0.00400505
	213943_at	213469_at	PGAP1	0.267242	5.73e-05				213943_at	213469_at	PGAP1	0.267242	0.000559646			213943_at	219241_x_at	SSH3	-0.227208	0.00401083
	213943_at	200909_s_at	RPLP2	0.266875	5.87e-05				213943_at	200909_s_at	RPLP2	0.266875	0.000571727			213943_at	218514_at	C17orf71	-0.227127	0.00402452
	213943_at	203234_at	UPP1	0.266843	5.88e-05				213943_at	203234_at	UPP1	0.266843	0.000572171			213943_at	212539_at	CHD1L	-0.227013	0.00404246
	213943_at	209944_at	ZNF410	0.266621	5.97e-05				213943_at	209944_at	ZNF410	0.266621	0.000579321			213943_at	208712_at	CCND1	-0.226912	0.00405757
	213943_at	212690_at	DDHD2	0.266576	5.99e-05				213943_at	212690_at	DDHD2	0.266576	0.000580726			213943_at	220488_s_at	BCAS3	-0.226901	0.00405757
	213943_at	209692_at	EYA2	0.26655	6e-05				213943_at	209692_at	EYA2	0.26655	0.00058116			213943_at	210389_x_at	TUBD1	-0.226871	0.00406196
	213943_at	200878_at	EPAS1	0.266315	6.09e-05				213943_at	200878_at	EPAS1	0.266315	0.000587713			213943_at	204342_at	SLC25A24	-0.226704	0.00409339
	213943_at	218573_at	MAGEH1	0.265865	6.28e-05				213943_at	218573_at	MAGEH1	0.265865	0.000603833			213943_at	214955_at	TMPRSS6	-0.226465	0.00414165
	213943_at	221475_s_at	RPL15	0.265502	6.43e-05				213943_at	221475_s_at	RPL15	0.265502	0.000615443			213943_at	218526_s_at	RANGRF	-0.22636	0.00415667
	213943_at	217165_x_at	MT1F	0.265444	6.45e-05				213943_at	217165_x_at	MT1F	0.265444	0.000616796			213943_at	219757_s_at	C14orf101	-0.226337	0.00415887
	213943_at	202952_s_at	ADAM12	0.265301	6.51e-05				213943_at	202952_s_at	ADAM12	0.265301	0.000621968			213943_at	218812_s_at	ORAI2	-0.226214	0.00418384
	213943_at	203180_at	ALDH1A3	0.264929	6.67e-05				213943_at	203180_at	ALDH1A3	0.264929	0.000634374			213943_at	209681_at	SLC19A2	-0.226177	0.00419015
	213943_at	200989_at	HIF1A	0.264882	6.7e-05				213943_at	200989_at	HIF1A	0.264882	0.000636651			213943_at	205408_at	MLLT10	-0.226161	0.00419146
	213943_at	208970_s_at	UROD	0.264708	6.77e-05				213943_at	208970_s_at	UROD	0.264708	0.000642722			213943_at	207891_s_at	HAUS7 / TREX2	-0.226055	0.0042095
	213943_at	206298_at	ARHGAP22	0.264655	6.8e-05				213943_at	206298_at	ARHGAP22	0.264655	0.000644407			213943_at	218105_s_at	MRPL4	-0.226054	0.0042095
	213943_at	200092_s_at	RPL37	0.264612	6.82e-05				213943_at	200092_s_at	RPL37	0.264612	0.000645721			213943_at	208656_s_at	CCNI	-0.225984	0.0042167
	213943_at	204442_x_at	LTBP4	0.264436	6.89e-05				213943_at	204442_x_at	LTBP4	0.264436	0.000651176			213943_at	202161_at	PKN1	-0.225905	0.004233
	213943_at	202620_s_at	PLOD2	0.264233	6.99e-05				213943_at	202620_s_at	PLOD2	0.264233	0.000660034			213943_at	209279_s_at	NSDHL	-0.225752	0.00425969
	213943_at	202727_s_at	IFNGR1	0.264153	7.02e-05				213943_at	202727_s_at	IFNGR1	0.264153	0.000661679			213943_at	212330_at	TFDP1	-0.225569	0.00429716
	213943_at	213488_at	SNED1	0.263943	7.12e-05				213943_at	213488_at	SNED1	0.263943	0.000669305			213943_at	200728_at	ACTR2	-0.225561	0.00429716
	213943_at	202037_s_at	SFRP1	0.263932	7.13e-05				213943_at	202037_s_at	SFRP1	0.263932	0.000669391			213943_at	215982_s_at	DOM3Z	-0.22555	0.00429716
	213943_at	213479_at	NPTX2	0.2639	7.14e-05				213943_at	213479_at	NPTX2	0.2639	0.000669391			213943_at	201633_s_at	CYB5B	-0.225549	0.00429716
	213943_at	203282_at	GBE1	0.263893	7.14e-05				213943_at	203282_at	GBE1	0.263893	0.000669391			213943_at	209326_at	SLC35A2	-0.225256	0.00436233
	213943_at	219598_s_at	RWDD1	0.263802	7.19e-05				213943_at	219598_s_at	RWDD1	0.263802	0.000672879			213943_at	208726_s_at	EIF2S2	-0.225175	0.00437202
	213943_at	219117_s_at	FKBP11	0.263712	7.23e-05				213943_at	219117_s_at	FKBP11	0.263712	0.000675421			213943_at	211596_s_at	LRIG1	-0.225149	0.00437202
	213943_at	210664_s_at	TFPI	0.263541	7.31e-05				213943_at	210664_s_at	TFPI	0.263541	0.000682288			213943_at	212686_at	PPM1H	-0.225099	0.00438105
	213943_at	213592_at	APLNR	0.263379	7.39e-05				213943_at	213592_at	APLNR	0.263379	0.000689144			213943_at	209002_s_at	CALCOCO1	-0.224856	0.00443116
	213943_at	206314_at	ZNF167	0.263223	7.46e-05				213943_at	206314_at	ZNF167	0.263223	0.00069444			213943_at	202590_s_at	PDK2	-0.224828	0.0044357
	213943_at	205403_at	IL1R2	0.262934	7.61e-05				213943_at	205403_at	IL1R2	0.262934	0.000707152			213943_at	201536_at	DUSP3	-0.224807	0.00443825
	213943_at	214175_x_at	PDLIM4	0.262883	7.63e-05				213943_at	214175_x_at	PDLIM4	0.262883	0.000708385			213943_at	218785_s_at	RABL5	-0.224419	0.0045154
	213943_at	209324_s_at	RGS16	0.262769	7.69e-05				213943_at	209324_s_at	RGS16	0.262769	0.000712697			213943_at	203727_at	SKIV2L	-0.224405	0.00451639
	213943_at	204435_at	NUPL1	0.262718	7.71e-05				213943_at	204435_at	NUPL1	0.262718	0.000713294			213943_at	219649_at	ALG6	-0.224346	0.00452386
	213943_at	210397_at	DEFB1	0.262497	7.83e-05				213943_at	210397_at	DEFB1	0.262497	0.000721856			213943_at	205948_at	PTPRT	-0.224161	0.00456536
	213943_at	200926_at	RPS23	0.26246	7.85e-05				213943_at	200926_at	RPS23	0.26246	0.000722434			213943_at	212599_at	AUTS2	-0.224065	0.00458231
	213943_at	219595_at	LOC100287515 / ZNF26	0.262396	7.88e-05				213943_at	219595_at	LOC100287515 / ZNF26	0.262396	0.00072456			213943_at	206855_s_at	HYAL2	-0.224033	0.00458788
	213943_at	209598_at	PNMA2	0.261707	8.24e-05				213943_at	209598_at	PNMA2	0.261707	0.000753709			213943_at	204006_s_at	FCGR3A /FCGR3B	-0.22401	0.00459113
	213943_at	200050_at	ZNF146	0.2617	8.24e-05				213943_at	200050_at	ZNF146	0.2617	0.000753709			213943_at	205652_s_at	TTLL1	-0.223777	0.00464332
	213943_at	209758_s_at	MFAP5	0.261682	8.25e-05				213943_at	209758_s_at	MFAP5	0.261682	0.000753968			213943_at	200601_at	ACTN4	-0.22365	0.00466846
	213943_at	208789_at	PTRF	0.261654	8.27e-05				213943_at	208789_at	PTRF	0.261654	0.00075514			213943_at	217716_s_at	SEC61A1	-0.223587	0.00467966
	213943_at	213221_s_at	SIK2	0.261549	8.32e-05				213943_at	213221_s_at	SIK2	0.261549	0.000759047			213943_at	218912_at	GCC1	-0.223443	0.00471194
	213943_at	213496_at	LPPR4	0.261498	8.35e-05				213943_at	213496_at	LPPR4	0.261498	0.000761123			213943_at	211297_s_at	CDK7	-0.223229	0.00476304
	213943_at	209487_at	RBPMS	0.261426	8.39e-05				213943_at	209487_at	RBPMS	0.261426	0.000764107			213943_at	209165_at	AATF	-0.223019	0.00481221
	213943_at	201795_at	LBR	0.261263	8.48e-05				213943_at	201795_at	LBR	0.261263	0.000770969			213943_at	201446_s_at	TIA1	-0.223014	0.00481221
	213943_at	214435_x_at	RALA	0.261184	8.52e-05				213943_at	214435_x_at	RALA	0.261184	0.000773269			213943_at	211665_s_at	SOS2	-0.222994	0.00481486
	213943_at	220432_s_at	CYP39A1	0.261139	8.55e-05				213943_at	220432_s_at	CYP39A1	0.261139	0.000775323			213943_at	219630_at	PDZK1IP1	-0.222948	0.00482446
	213943_at	204401_at	KCNN4	0.260943	8.66e-05				213943_at	204401_at	KCNN4	0.260943	0.000783272			213943_at	208756_at	EIF3I	-0.222617	0.00490822
	213943_at	205236_x_at	SOD3	0.260881	8.69e-05				213943_at	205236_x_at	SOD3	0.260881	0.00078531			213943_at	201216_at	ERP29	-0.222572	0.00491776
	213943_at	204051_s_at	SFRP4	0.260738	8.77e-05				213943_at	204051_s_at	SFRP4	0.260738	0.000790502			213943_at	218250_s_at	CNOT7	-0.222448	0.00494541
	213943_at	210609_s_at	TP53I3	0.26071	8.79e-05				213943_at	210609_s_at	TP53I3	0.26071	0.000791627			213943_at	212986_s_at	TLK2	-0.222441	0.00494541
	213943_at	203505_at	ABCA1	0.260536	8.89e-05				213943_at	203505_at	ABCA1	0.260536	0.000799264			213943_at	217043_s_at	MFN1	-0.222381	0.00495901
	213943_at	215358_x_at	ZNF37B	0.260481	8.92e-05				213943_at	215358_x_at	ZNF37B	0.260481	0.00079991			213943_at	220672_at	PPP4R4	-0.222276	0.0049851
	213943_at	209589_s_at	EPHB2	0.260422	8.95e-05				213943_at	209589_s_at	EPHB2	0.260422	0.000801917			213943_at	203271_s_at	UNC119	-0.222195	0.00500479
	213943_at	203256_at	CDH3	0.260039	9.18e-05				213943_at	203256_at	CDH3	0.260039	0.000820428			213943_at	203782_s_at	POLRMT	-0.222025	0.00504628
	213943_at	202029_x_at	RPL38	0.259784	9.33e-05				213943_at	202029_x_at	RPL38	0.259784	0.000833126			213943_at	210224_at	MR1	-0.221989	0.00505355
	213943_at	219054_at	C5orf23	0.259605	9.44e-05				213943_at	219054_at	C5orf23	0.259605	0.000840096			213943_at	212168_at	RBM12	-0.221689	0.00512956
	213943_at	207688_s_at	?	0.259512	9.5e-05				213943_at	207688_s_at	INHBC	0.259512	0.000843295			213943_at	221712_s_at	WDR74	-0.221505	0.0051732
	213943_at	219561_at	COPZ2	0.259432	9.55e-05				213943_at	219561_at	COPZ2	0.259432	0.000847019			213943_at	205565_s_at	FXN	-0.221473	0.00517883
	213943_at	206838_at	TBX19	0.259156	9.72e-05				213943_at	206838_at	TBX19	0.259156	0.000858478			213943_at	212100_s_at	POLDIP3	-0.221343	0.00521097
	213943_at	204797_s_at	EML1	0.259062	9.77e-05				213943_at	204797_s_at	EML1	0.259062	0.000861447			213943_at	218318_s_at	NLK	-0.221333	0.00521097
	213943_at	212836_at	POLD3	0.259029	9.8e-05				213943_at	212836_at	POLD3	0.259029	0.000861925			213943_at	218900_at	CNNM4	-0.221256	0.0052304
	213943_at	218005_at	ZNF22	0.259029	9.8e-05				213943_at	218005_at	ZNF22	0.259029	0.000861925			213943_at	217939_s_at	AFTPH	-0.221213	0.00523832
	213943_at	209960_at	HGF	0.258886	9.89e-05				213943_at	209960_at	HGF	0.258886	0.000868388			213943_at	217871_s_at	MIF	-0.221184	0.00524249
	213943_at	204449_at	PDCL	0.258623	0.00010054				213943_at	204449_at	PDCL	0.258623	0.00087766			213943_at	203198_at	CDK9	-0.221148	0.00525027
	213943_at	207069_s_at	SMAD6	0.258554	0.00010099				213943_at	207069_s_at	SMAD6	0.258554	0.000878671			213943_at	201371_s_at	CUL3	-0.221122	0.00525489
	213943_at	221933_at	NLGN4X	0.258493	0.00010138				213943_at	221933_at	NLGN4X	0.258493	0.000880608			213943_at	217742_s_at	WAC	-0.221052	0.00527209
	213943_at	212859_x_at	MT1E	0.258435	0.00010176				213943_at	212859_x_at	MT1E	0.258435	0.000883179			213943_at	208132_x_at	BAT2	-0.220986	0.00528849
	213943_at	204165_at	WASF1	0.258387	0.000102072				213943_at	204165_at	WASF1	0.258387	0.000885157			213943_at	201435_s_at	EIF4E	-0.220901	0.00531038
	213943_at	210643_at	TNFSF11	0.25832	0.000102512				213943_at	210643_at	TNFSF11	0.25832	0.00088824			213943_at	202487_s_at	H2AFV	-0.220852	0.00532181
	213943_at	221019_s_at	COLEC12	0.258129	0.000103776				213943_at	221019_s_at	COLEC12	0.258129	0.000897235			213943_at	71933_at	WNT6	-0.220797	0.00533501
	213943_at	205583_s_at	ALG13	0.258125	0.000103806				213943_at	205583_s_at	ALG13	0.258125	0.000897235			213943_at	221042_s_at	CLMN	-0.220536	0.00540311
	213943_at	202112_at	VWF	0.258062	0.000104224				213943_at	202112_at	VWF	0.258062	0.000900109			213943_at	201057_s_at	GOLGB1	-0.220493	0.00540848
	213943_at	205422_s_at	ITGBL1	0.257988	0.000104714				213943_at	205422_s_at	ITGBL1	0.257988	0.000902858			213943_at	207938_at	PI15	-0.22032	0.00545279
	213943_at	205923_at	RELN	0.257871	0.000105506				213943_at	205923_at	RELN	0.257871	0.000908942			213943_at	201729_s_at	KIAA0100	-0.220208	0.00548026
	213943_at	205717_x_at	PCDHGA1 / PCDHGA10	0.257846	0.000105672				213943_at	205717_x_at	PCDHGA1 /PCDHGA10	0.257846	0.000909627			213943_at	200805_at	LMAN2	-0.219983	0.00553919
	213943_at	213125_at	OLFML2B	0.257767	0.000106212				213943_at	213125_at	OLFML2B	0.257767	0.000912036			213943_at	203713_s_at	LLGL2	-0.219894	0.0055605
	213943_at	208949_s_at	LGALS3	0.257689	0.000106742				213943_at	208949_s_at	LGALS3	0.257689	0.000915299			213943_at	201770_at	SNRPA	-0.219889	0.0055605
	213943_at	205804_s_at	TRAF3IP3	0.25758	0.000107486				213943_at	205804_s_at	TRAF3IP3	0.25758	0.000919972			213943_at	218187_s_at	C8orf33	-0.219874	0.0055605
									213943_at	219873_at	COLEC11	0.257539	0.000921601			213943_at	203209_at	RFC5	-0.219661	0.00562258
									213943_at	218888_s_at	NETO2	0.2575	0.000922991			213943_at	201194_at	SEPW1	-0.219567	0.00564551
									213943_at	213931_at	ID2 / ID2B	0.25749	0.000922991			213943_at	202313_at	PPP2R2A	-0.219546	0.00564688
									213943_at	213801_x_at	RPSA	0.257465	0.000923761			213943_at	201346_at	ADIPOR2	-0.219453	0.0056715
									213943_at	217789_at	SNX6	0.257399	0.000926917			213943_at	203831_at	R3HDM2	-0.219268	0.00571698
									213943_at	218995_s_at	EDN1	0.25735	0.000929011			213943_at	222311_s_at	SFRS15	-0.218931	0.00580735
									213943_at	37462_i_at	SF3A2	0.257239	0.000934914			213943_at	218466_at	TBC1D17	-0.218907	0.00581169
									213943_at	203075_at	SMAD2	0.257137	0.000939454			213943_at	202250_s_at	DCAF8	-0.218812	0.00583295
									213943_at	214023_x_at	TUBB2B	0.257023	0.000945521			213943_at	210707_x_at	PMS2L11	-0.218666	0.00587612
									213943_at	218183_at	C16orf5	0.256998	0.000946269			213943_at	202581_at	HSPA1A / HSPA1B	-0.218643	0.00587712
									213943_at	205419_at	GPR183	0.256867	0.000952723			213943_at	205356_at	USP13	-0.2186	0.00588778
									213943_at	221958_s_at	GPR177	0.256544	0.000970164			213943_at	221039_s_at	ASAP1	-0.218565	0.0058947
									213943_at	219247_s_at	ZDHHC14	0.256451	0.000974345			213943_at	205933_at	SETBP1	-0.218512	0.00590358
									213943_at	214954_at	SUSD5	0.256217	0.000986564			213943_at	203268_s_at	DRG2	-0.218354	0.00594195
									213943_at	206170_at	ADRB2	0.256186	0.000987693			213943_at	218341_at	PPCS	-0.218263	0.00596208
									213943_at	222033_s_at	FLT1	0.256128	0.000990567			213943_at	209623_at	MCCC2	-0.218179	0.00598295
									213943_at	210095_s_at	IGFBP3	0.255964	0.000998526			213943_at	211047_x_at	AP2S1	-0.218143	0.00599174
									213943_at	211478_s_at	DPP4	0.255904	0.00100097			213943_at	204917_s_at	MLLT3	-0.217917	0.00605918
									213943_at	201094_at	RPS29	0.255884	0.00100097			213943_at	220085_at	HELLS	-0.21773	0.00609798
									213943_at	218071_s_at	MKRN2	0.255856	0.00100097			213943_at	201714_at	TUBG1	-0.217345	0.00619476
									213943_at	203843_at	RPS6KA3	0.25585	0.00100097			213943_at	210775_x_at	CASP9	-0.217259	0.00621997
									213943_at	201542_at	SAR1A	0.255838	0.00100097			213943_at	219913_s_at	CRNKL1	-0.217237	0.00622444
									213943_at	205198_s_at	ATP7A	0.255798	0.00100268			213943_at	217749_at	COPG	-0.217093	0.00626656
									213943_at	212333_at	FAM98A	0.255717	0.0010055			213943_at	200950_at	ARPC1A	-0.21684	0.00634899
									213943_at	221634_at	RPL23AP7	0.255539	0.0010153			213943_at	212956_at	TBC1D9	-0.216796	0.00635757
									213943_at	200047_s_at	YY1	0.255431	0.00102069			213943_at	203466_at	MPV17	-0.216689	0.00639121
									213943_at	218793_s_at	SCML1	0.255373	0.00102366			213943_at	215417_at	EXOC6B	-0.21663	0.00640815
									213943_at	205051_s_at	KIT	0.255331	0.00102475			213943_at	213748_at	TRIM66	-0.216497	0.0064446
									213943_at	206653_at	POLR3G	0.255194	0.00103286			213943_at	218740_s_at	CDK5RAP3	-0.216496	0.0064446
									213943_at	205713_s_at	COMP	0.25505	0.00104064			213943_at	202579_x_at	HMGN4	-0.216464	0.00645215
									213943_at	209572_s_at	EED	0.255015	0.00104163			213943_at	206235_at	LIG4	-0.216318	0.00649297
									213943_at	219460_s_at	TMEM127	0.255002	0.00104163			213943_at	212801_at	CIT	-0.216109	0.00655321
									213943_at	217767_at	C3	0.25482	0.00105095			213943_at	218748_s_at	EXOC5	-0.215968	0.006596
									213943_at	202408_s_at	PRPF31	0.254682	0.00105691			213943_at	205839_s_at	BZRAP1	-0.215467	0.00675484
									213943_at	200785_s_at	LRP1	0.254316	0.00107906			213943_at	209004_s_at	FBXL5	-0.215445	0.0067594
									213943_at	214464_at	CDC42BPA	0.254137	0.00108958			213943_at	210815_s_at	CALCRL	-0.215422	0.00676439
									213943_at	215116_s_at	DNM1	0.254109	0.0010907			213943_at	221171_at	CCDC30	-0.215235	0.00682524
									213943_at	209290_s_at	NFIB	0.253992	0.0010979			213943_at	218401_s_at	ZNF281	-0.215119	0.00685745
									213943_at	209283_at	CRYAB	0.253892	0.00110312			213943_at	215544_s_at	UBOX5	-0.214971	0.00690133
									213943_at	203255_at	FBXO11	0.253805	0.00110747			213943_at	212266_s_at	SFRS5	-0.214898	0.00692106
									213943_at	218950_at	ARAP3	0.253636	0.00111501			213943_at	202418_at	YIF1A	-0.214864	0.00693027
									213943_at	207011_s_at	PTK7	0.253537	0.00111907			213943_at	204881_s_at	UGCG	-0.214661	0.00699886
									213943_at	204894_s_at	AOC3	0.253155	0.00114306			213943_at	215631_s_at	BRMS1	-0.214396	0.00708051
									213943_at	212992_at	AHNAK2	0.25297	0.00115552			213943_at	202331_at	BCKDHA	-0.214369	0.00708687
									213943_at	202698_x_at	COX4I1	0.252919	0.00115837			213943_at	218721_s_at	C1orf27	-0.214271	0.00712038
									213943_at	212717_at	PLEKHM1	0.252746	0.00116654			213943_at	200078_s_at	ATP6V0B	-0.214189	0.0071444
									213943_at	221474_at	MYL12B	0.252634	0.00117296			213943_at	208783_s_at	CD46	-0.214105	0.00716563
									213943_at	204610_s_at	CCDC85B	0.252481	0.00118336			213943_at	203419_at	MLL4	-0.214077	0.00717276
									213943_at	222020_s_at	NTM	0.252084	0.00121037			213943_at	221553_at	MAGT1	-0.213788	0.0072656
									213943_at	219983_at	HRASLS	0.251853	0.0012261			213943_at	200654_at	P4HB	-0.213778	0.00726596
									213943_at	204882_at	ARHGAP25	0.25172	0.00123535			213943_at	200634_at	PFN1	-0.213749	0.00727323
									213943_at	203477_at	COL15A1	0.251638	0.00124072			213943_at	200862_at	DHCR24	-0.213712	0.00728053
									213943_at	206307_s_at	FOXD1	0.251444	0.001253			213943_at	214616_at	HIST1H3E	-0.21368	0.00728913
									213943_at	214744_s_at	RPL23	0.251319	0.00126185			213943_at	209044_x_at	SF3B4	-0.213397	0.00739231
									213943_at	209377_s_at	HMGN3	0.251168	0.00127158			213943_at	201388_at	PSMD3	-0.213187	0.00745236
									213943_at	218736_s_at	PALMD	0.25116	0.00127158			213943_at	215084_s_at	LRRC42	-0.213076	0.00749267
									213943_at	209047_at	AQP1 / INMT	0.251011	0.00128058			213943_at	219048_at	PIGN	-0.212969	0.00752404
									213943_at	221009_s_at	ANGPTL4	0.25101	0.00128058			213943_at	217893_s_at	AKIRIN1	-0.212932	0.00753488
									213943_at	213384_x_at	PLCB3	0.250907	0.00128593			213943_at	40149_at	SH2B1	-0.212923	0.00753488
									213943_at	208498_s_at	AMY1A / AMY1B	0.250716	0.00130031			213943_at	220954_s_at	PILRB	-0.212838	0.00756507
									213943_at	210495_x_at	FN1	0.250666	0.00130343			213943_at	201524_x_at	UBE2N	-0.212779	0.00758498
									213943_at	221935_s_at	C3orf64	0.250608	0.00130715			213943_at	213528_at	C1orf156	-0.212687	0.00761114
									213943_at	215136_s_at	EXOSC8	0.25059	0.00130763			213943_at	202529_at	PRPSAP1	-0.212665	0.00761578
									213943_at	204655_at	CCL5	0.250532	0.00131138			213943_at	216996_s_at	FASTKD2	-0.212575	0.00764832
									213943_at	218820_at	C14orf132	0.250352	0.0013226			213943_at	209123_at	QDPR	-0.212492	0.00767474
									213943_at	216860_s_at	GDF11	0.25025	0.00132957			213943_at	201339_s_at	SCP2	-0.212482	0.00767474
									213943_at	213524_s_at	G0S2	0.250015	0.00134604			213943_at	218969_at	Magmas	-0.212443	0.00768687
									213943_at	204642_at	S1PR1	0.249955	0.00135009			213943_at	221223_x_at	CISH	-0.212241	0.00775409
									213943_at	202553_s_at	SYF2	0.249829	0.00135865			213943_at	217943_s_at	MAP7D1	-0.212159	0.00777984
									213943_at	201150_s_at	TIMP3	0.249815	0.00135887			213943_at	200924_s_at	SLC3A2	-0.211901	0.00786116
									213943_at	218913_s_at	GMIP	0.249668	0.00136922			213943_at	208925_at	CLDND1	-0.211897	0.00786116
									213943_at	212873_at	HMHA1	0.249638	0.00136976			213943_at	220788_s_at	RNF31	-0.211819	0.00788951
									213943_at	209099_x_at	JAG1	0.249233	0.00140241			213943_at	218521_s_at	UBE2W	-0.21175	0.00791455
									213943_at	201757_at	NDUFS5	0.249204	0.00140307			213943_at	201716_at	SNX1	-0.211719	0.00791954
									213943_at	202052_s_at	RAI14	0.24919	0.00140307			213943_at	201598_s_at	INPPL1	-0.211578	0.00797072
									213943_at	204748_at	PTGS2	0.248947	0.00142114			213943_at	205186_at	DNALI1	-0.211421	0.00802496
									213943_at	209699_x_at	AKR1C2	0.248728	0.00143427			213943_at	218686_s_at	RHBDF1	-0.211381	0.00803205
									213943_at	218326_s_at	LGR4	0.248728	0.00143427			213943_at	201050_at	PLD3	-0.211377	0.00803205
									213943_at	212805_at	PRUNE2	0.248618	0.00144178			213943_at	213639_s_at	ZNF500	-0.211305	0.00805472
									213943_at	202110_at	COX7B	0.24858	0.00144411			213943_at	220520_s_at	NUP62CL	-0.211199	0.00809149
									213943_at	201981_at	PAPPA	0.248273	0.00146961			213943_at	202810_at	DRG1	-0.211127	0.00811457
									213943_at	212122_at	RHOQ	0.247911	0.00149832			213943_at	210125_s_at	BANF1	-0.211067	0.00813232
									213943_at	218683_at	PTBP2	0.247897	0.0014985			213943_at	211935_at	ARL6IP1	-0.211023	0.00814718
									213943_at	201963_at	ACSL1	0.247255	0.00155197			213943_at	202290_at	PDAP1	-0.210991	0.00815694
									213943_at	221580_s_at	TAF1D	0.24714	0.00156189			213943_at	221196_x_at	BRCC3	-0.210941	0.0081743
									213943_at	218288_s_at	CCDC90B	0.247013	0.00157286			213943_at	35160_at	LDB1	-0.210877	0.00819469
									213943_at	211756_at	PTHLH	0.246865	0.00158343			213943_at	215749_s_at	GORASP1	-0.210823	0.00820917
									213943_at	218886_at	PAK1IP1	0.246861	0.00158343			213943_at	219341_at	CLN8	-0.210673	0.00826242
									213943_at	205547_s_at	TAGLN	0.246792	0.00158808			213943_at	201800_s_at	OSBP	-0.210672	0.00826242
									213943_at	202341_s_at	TRIM2	0.246747	0.00158957			213943_at	205471_s_at	DACH1	-0.210571	0.00830198
									213943_at	218885_s_at	GALNT12	0.246652	0.0015976			213943_at	221036_s_at	APH1B	-0.210466	0.00834403
									213943_at	205959_at	MMP13	0.246508	0.00160712			213943_at	200658_s_at	PHB	-0.210446	0.00834871
									213943_at	206914_at	CRTAM	0.246301	0.00162532			213943_at	203051_at	BAHD1	-0.210398	0.00836291
									213943_at	202497_x_at	SLC2A3	0.245969	0.00165426			213943_at	213234_at	KIAA1467	-0.210386	0.00836291
									213943_at	218213_s_at	C11orf10	0.245848	0.00166251			213943_at	213839_at	CLMN	-0.210374	0.00836414
									213943_at	218223_s_at	PLEKHO1	0.24574	0.00167042			213943_at	220305_at	MAVS	-0.210327	0.00838047
									213943_at	212944_at	SLC5A3	0.245735	0.00167042			213943_at	209538_at	ZNF32	-0.21009	0.00847695
									213943_at	201290_at	SEC11A	0.245515	0.0016906			213943_at	202033_s_at	RB1CC1	-0.210046	0.00848419
									213943_at	221942_s_at	GUCY1A3	0.245382	0.00170319			213943_at	221412_at	VN1R1	-0.209823	0.00856297
									213943_at	209994_s_at	ABCB1 / ABCB4	0.245223	0.00171722			213943_at	204811_s_at	CACNA2D2	-0.209515	0.0086893
									213943_at	203981_s_at	ABCD4	0.245162	0.00172237			213943_at	203933_at	RAB11FIP3	-0.2095	0.00869167
									213943_at	205214_at	STK17B	0.245136	0.00172396			213943_at	203246_s_at	TUSC4	-0.209357	0.00875241
									213943_at	204268_at	S100A2	0.245027	0.00173291			213943_at	218120_s_at	HMOX2	-0.209258	0.00878953
									213943_at	219366_at	AVEN	0.244685	0.00176425			213943_at	220319_s_at	MYLIP	-0.209235	0.00879147
									213943_at	212950_at	GPR116	0.244591	0.00177316			213943_at	204129_at	BCL9	-0.209172	0.00881642
									213943_at	204276_at	TK2	0.244574	0.00177383			213943_at	204443_at	ARSA	-0.209121	0.00883148
									213943_at	209370_s_at	SH3BP2	0.244549	0.00177524			213943_at	208644_at	PARP1	-0.209048	0.00885526
									213943_at	218597_s_at	CISD1	0.244431	0.00178486			213943_at	220789_s_at	TBRG4	-0.208951	0.00889201
									213943_at	221657_s_at	ASB6	0.244424	0.00178486			213943_at	218720_x_at	SEZ6L2	-0.208944	0.00889201
									213943_at	205003_at	DOCK4	0.244239	0.00180161			213943_at	211997_x_at	H3F3B	-0.208781	0.00895484
									213943_at	208109_s_at	C15orf5	0.244236	0.00180161			213943_at	208619_at	DDB1	-0.208638	0.00901293
									213943_at	202401_s_at	SRF	0.244167	0.00180781			213943_at	219411_at	ELMO3	-0.208495	0.00907587
									213943_at	203743_s_at	TDG	0.243976	0.00182378			213943_at	209526_s_at	HDGFRP3	-0.208449	0.00908911
									213943_at	220327_at	VGLL3	0.243364	0.00188732			213943_at	210995_s_at	TRIM23	-0.20836	0.00911489
									213943_at	200888_s_at	RPL23	0.243312	0.00189182			213943_at	218111_s_at	CMAS	-0.208348	0.00911489
									213943_at	202149_at	NEDD9	0.243285	0.00189357			213943_at	219420_s_at	C1orf163	-0.208311	0.00912716
									213943_at	33322_i_at	SFN	0.243264	0.00189472			213943_at	202584_at	NFX1	-0.208167	0.00918367
									213943_at	204831_at	CDK8	0.243246	0.00189545			213943_at	221965_at	MPHOSPH9	-0.207922	0.00927569
									213943_at	206618_at	IL18R1	0.243152	0.001905			213943_at	218548_x_at	TEX264	-0.207886	0.00928343
									213943_at	205267_at	POU2AF1	0.243099	0.00190831			213943_at	215434_x_at	LOC100288142 /NBPF1	-0.207867	0.00928804
									213943_at	202682_s_at	USP4	0.242746	0.00194403			213943_at	208742_s_at	SAP18	-0.207687	0.00936152
									213943_at	203230_at	DVL1	0.242548	0.0019659			213943_at	203381_s_at	APOE	-0.2075	0.00944369
									213943_at	220933_s_at	ZCCHC6	0.242513	0.00196859			213943_at	201874_at	MPZL1	-0.207143	0.00959612
									213943_at	201174_s_at	TERF2IP	0.242502	0.00196868			213943_at	202636_at	RNF103	-0.207088	0.00961529
									213943_at	215321_at	RUNDC3B	0.242455	0.00197159			213943_at	202527_s_at	SMAD4	-0.207019	0.00964032
									213943_at	213959_s_at	RPGRIP1L	0.242344	0.00198196			213943_at	205696_s_at	GFRA1	-0.206935	0.00967777
									213943_at	214749_s_at	ARMCX6 / LOC653354	0.242218	0.00199431			213943_at	200903_s_at	AHCY	-0.206812	0.00972567
									213943_at	211734_s_at	FCER1A	0.242199	0.00199524			213943_at	213283_s_at	SALL2	-0.206764	0.00973931
									213943_at	218146_at	GLT8D1	0.242184	0.0019956			213943_at	218260_at	DDA1	-0.206758	0.00973931
									213943_at	202141_s_at	COPS8	0.242139	0.00199961			213943_at	203274_at	F8A1 /F8A2	-0.206716	0.00975619
									213943_at	201387_s_at	UCHL1	0.242128	0.00199961			213943_at	208579_x_at	H2BFS / HIST1H2BK	-0.206642	0.00978859
									213943_at	209735_at	ABCG2	0.242108	0.00200068			213943_at	214017_s_at	DHX34	-0.206557	0.00982226
									213943_at	204438_at	MRC1 / MRC1L1	0.241962	0.00201688			213943_at	202550_s_at	VAPB	-0.206508	0.00983129
									213943_at	204453_at	ZNF84	0.241648	0.00204832			213943_at	212541_at	FLAD1	-0.206505	0.00983129
									213943_at	217728_at	S100A6	0.241571	0.00205632			213943_at	215780_s_at	hCG_1644608 / SET	-0.206502	0.00983129
									213943_at	200090_at	FNTA	0.241554	0.00205706			213943_at	208546_x_at	HIST1H2BH	-0.206503	0.00983129
									213943_at	201153_s_at	MBNL1	0.241457	0.0020672			213943_at	220661_s_at	ZNF692	-0.206424	0.00986193
									213943_at	221791_s_at	CCDC72	0.24145	0.0020672			213943_at	205273_s_at	PITRM1	-0.206309	0.00991308
									213943_at	219795_at	SLC6A14	0.241071	0.00210818			213943_at	203252_at	CDK2AP2	-0.206211	0.0099448
									213943_at	209351_at	KRT14	0.240987	0.0021151			213943_at	203116_s_at	FECH	-0.206194	0.00994795
									213943_at	40560_at	TBX2	0.240873	0.00212707			213943_at	201527_at	ATP6V1F	-0.20616	0.00995979
									213943_at	220252_x_at	CXorf21	0.240832	0.00213043			213943_at	201632_at	EIF2B1	-0.206045	0.0100094
									213943_at	204469_at	PTPRZ1	0.240629	0.00215015			213943_at	214077_x_at	MEIS3P1	-0.205912	0.0100732
									213943_at	212611_at	DTX4	0.240074	0.00221102			213943_at	209577_at	PCYT2	-0.205882	0.010084
									213943_at	218371_s_at	PSPC1	0.240006	0.00221863			213943_at	217903_at	STRN4	-0.205776	0.0101305
									213943_at	208836_at	ATP1B3	0.239904	0.00222738			213943_at	204231_s_at	FAAH	-0.205693	0.0101682
									213943_at	219656_at	PCDH12	0.239894	0.00222738			213943_at	218698_at	APIP	-0.205602	0.0102023
									213943_at	206227_at	CILP	0.239568	0.00226649			213943_at	205645_at	REPS2	-0.205546	0.0102227
									213943_at	200840_at	KARS	0.23953	0.00227013			213943_at	208987_s_at	KDM2A	-0.205453	0.010266
									213943_at	213348_at	CDKN1C	0.23941	0.00228488			213943_at	215549_x_at	hCG_2030429	-0.205355	0.0102999
									213943_at	34187_at	RBMS2	0.239264	0.0023017			213943_at	206869_at	CHAD	-0.205353	0.0102999
									213943_at	209122_at	PLIN2	0.239207	0.00230642			213943_at	203931_s_at	MRPL12	-0.205286	0.0103306
									213943_at	219032_x_at	OPN3	0.238942	0.00233977			213943_at	218841_at	ASB8	-0.20523	0.0103556
									213943_at	200905_x_at	HLA-E	0.238729	0.00236626			213943_at	217754_at	DDX56	-0.205169	0.0103721
									213943_at	219477_s_at	THSD1 / THSD1P	0.238567	0.00238293			213943_at	217861_s_at	PREB	-0.205023	0.010437
									213943_at	203184_at	FBN2	0.238369	0.00240617			213943_at	205450_at	PHKA1	-0.204996	0.0104419
									213943_at	212501_at	CEBPB	0.238354	0.00240666			213943_at	201035_s_at	HADH	-0.204747	0.0105627
									213943_at	205596_s_at	SMURF2	0.238276	0.00241635			213943_at	212064_x_at	MAZ	-0.204744	0.0105627
									213943_at	221538_s_at	PLXNA1	0.23824	0.00241971			213943_at	219044_at	THNSL2	-0.2047	0.0105817
									213943_at	204135_at	FILIP1L	0.238125	0.00243156			213943_at	206949_s_at	RUSC1	-0.204657	0.0105998
									213943_at	204820_s_at	BTN3A2 /// BTN3A3	0.237749	0.00247479			213943_at	221268_s_at	SGPP1	-0.204617	0.0106168
									213943_at	201787_at	FBLN1	0.237543	0.00250168			213943_at	204505_s_at	EPB49	-0.204567	0.0106338
									213943_at	203233_at	IL4R	0.237188	0.00255121			213943_at	209739_s_at	PNPLA4	-0.204201	0.010797
									213943_at	217764_s_at	RAB31	0.236958	0.00257577			213943_at	209001_s_at	ANAPC13	-0.204201	0.010797
									213943_at	209007_s_at	C1orf63	0.236797	0.00259694			213943_at	213454_at	APITD1	-0.204093	0.0108449
									213943_at	222138_s_at	WDR13	0.23671	0.00260685			213943_at	38766_at	SRCAP	-0.204037	0.0108712
									213943_at	214953_s_at	APP	0.236663	0.00261233			213943_at	209020_at	C20orf111	-0.204003	0.0108843
									213943_at	220750_s_at	LEPRE1	0.236421	0.00264274			213943_at	219214_s_at	NT5C	-0.203921	0.0109198
									213943_at	36711_at	MAFF	0.236411	0.00264274			213943_at	214484_s_at	SIGMAR1	-0.203809	0.0109771
									213943_at	201887_at	IL13RA1	0.236386	0.00264495			213943_at	202123_s_at	ABL1	-0.2038	0.0109778
									213943_at	217143_s_at	TRA@ / TRD@	0.236344	0.00264971			213943_at	208308_s_at	GPI	-0.203721	0.0110064
									213943_at	217950_at	NOSIP	0.236142	0.00267788			213943_at	210647_x_at	PLA2G6	-0.203454	0.0111221
									213943_at	212753_at	PCGF3	0.236004	0.00269619			213943_at	209494_s_at	PATZ1	-0.203396	0.01115
									213943_at	204679_at	KCNK1	0.235681	0.00274552			213943_at	211715_s_at	BDH1	-0.203234	0.0112268
									213943_at	204971_at	CSTA	0.235603	0.0027511			213943_at	204019_s_at	SH3YL1	-0.20318	0.0112518
									213943_at	218127_at	NFYB	0.235522	0.0027607			213943_at	207180_s_at	HTATIP2	-0.203076	0.0112877
									213943_at	201960_s_at	MYCBP2	0.235481	0.00276549			213943_at	217829_s_at	USP39	-0.202965	0.0113299
									213943_at	218196_at	OSTM1	0.235421	0.00277142			213943_at	209215_at	MFSD10	-0.202944	0.0113367
									213943_at	209187_at	DR1	0.235346	0.00278013			213943_at	214164_x_at	CA12	-0.202936	0.0113367
									213943_at	220225_at	IRX4	0.235272	0.00278538			213943_at	206138_s_at	PI4KB	-0.202876	0.0113661
									213943_at	212788_x_at	FTL	0.234901	0.00283815			213943_at	204966_at	BAI2	-0.202674	0.0114672
									213943_at	207339_s_at	LTB	0.234895	0.00283815			213943_at	218211_s_at	MLPH	-0.202496	0.011556
									213943_at	200757_s_at	CALU	0.234766	0.00285778			213943_at	218664_at	MECR	-0.202451	0.0115769
									213943_at	202741_at	PRKACB	0.234692	0.00286841			213943_at	200925_at	COX6A1	-0.202309	0.011639
									213943_at	209185_s_at	IRS2	0.234487	0.00289913			213943_at	203611_at	TERF2	-0.202169	0.0117069
									213943_at	221029_s_at	WNT5B	0.234327	0.00292252			213943_at	217944_at	POMGNT1	-0.202116	0.0117271
									213943_at	211056_s_at	SRD5A1	0.234193	0.00293468			213943_at	206789_s_at	POU2F1	-0.202021	0.0117778
									213943_at	201227_s_at	NDUFB8	0.234162	0.00293771			213943_at	217797_at	UFC1	-0.202013	0.0117778
									213943_at	212852_s_at	TROVE2	0.234068	0.00295187			213943_at	210371_s_at	RBBP4	-0.201994	0.0117822
									213943_at	203304_at	BAMBI	0.234047	0.00295187			213943_at	214697_s_at	ROD1	-0.201931	0.0118036
									213943_at	56256_at	SIDT2	0.234047	0.00295187			213943_at	218073_s_at	TMEM48	-0.20127	0.0121448
									213943_at	204656_at	SHB	0.234003	0.00295382			213943_at	212540_at	CDC34	-0.201203	0.0121755
									213943_at	208078_s_at	SIK1	0.233902	0.00296752			213943_at	203363_s_at	KIAA0652	-0.201172	0.0121894
									213943_at	219132_at	PELI2	0.233876	0.00296813			213943_at	218979_at	RMI1	-0.201029	0.0122658
									213943_at	204000_at	GNB5	0.233866	0.00296813			213943_at	35265_at	FXR2	-0.201015	0.0122679
									213943_at	212224_at	ALDH1A1	0.233802	0.00297737			213943_at	201903_at	UQCRC1	-0.20101	0.0122679
									213943_at	204838_s_at	MLH3	0.233779	0.00297785			213943_at	221695_s_at	MAP3K2	-0.200991	0.0122735
									213943_at	219371_s_at	KLF2	0.233753	0.0029803			213943_at	209460_at	ABAT	-0.200892	0.0123241
									213943_at	212401_s_at	CDC2L2	0.233736	0.00298131			213943_at	214876_s_at	TUBGCP5	-0.200738	0.0124083
									213943_at	222273_at	PAPOLG	0.233708	0.00298428			213943_at	210555_s_at	NFATC3	-0.200476	0.0125671
									213943_at	206049_at	SELP	0.233559	0.00300827			213943_at	203800_s_at	MRPS14	-0.200378	0.0126119
									213943_at	218357_s_at	TIMM8B	0.233289	0.00304999			213943_at	202962_at	KIF13B	-0.200334	0.0126337
									213943_at	205846_at	PTPRB	0.233119	0.00307072			213943_at	218361_at	GOLPH3L	-0.200284	0.0126601
									213943_at	207103_at	KCND2	0.232848	0.00310961			213943_at	201563_at	SORD	-0.200068	0.0127709
									213943_at	204219_s_at	PSMC1	0.232766	0.00312225			213943_at	204404_at	SLC12A2	-0.200033	0.0127816
									213943_at	212245_at	MCFD2	0.232578	0.00315441			213943_at	212186_at	ACACA	-0.199773	0.012931
									213943_at	221495_s_at	TCF25	0.232552	0.00315724			213943_at	203463_s_at	EPN2	-0.199705	0.0129573
									213943_at	219747_at	C4orf31	0.23248	0.00316455			213943_at	200895_s_at	FKBP4	-0.199682	0.0129573
									213943_at	206560_s_at	MIA	0.232458	0.0031666			213943_at	212577_at	SMCHD1	-0.19968	0.0129573
									213943_at	203151_at	MAP1A	0.232348	0.00318478			213943_at	209759_s_at	DCI	-0.199556	0.0130266
									213943_at	37892_at	COL11A1	0.232269	0.00319356			213943_at	218398_at	MRPS30	-0.199432	0.0130901
									213943_at	205297_s_at	CD79B	0.232211	0.00320125			213943_at	202477_s_at	TUBGCP2	-0.199412	0.0130971
									213943_at	218902_at	NOTCH1	0.232185	0.00320125			213943_at	208389_s_at	SLC1A2	-0.199297	0.0131672
									213943_at	203956_at	MORC2	0.232184	0.00320125			213943_at	209186_at	ATP2A2	-0.199212	0.0132175
									213943_at	219390_at	FKBP14	0.23196	0.003241			213943_at	200837_at	BCAP31	-0.199085	0.0132776
									213943_at	212982_at	ZDHHC17	0.231909	0.00324847			213943_at	202845_s_at	RALBP1	-0.199086	0.0132776
									213943_at	207039_at	CDKN2A	0.231798	0.00326713			213943_at	209070_s_at	RGS5	-0.199009	0.0133127
									213943_at	208847_s_at	ADH5	0.231765	0.00327152			213943_at	217882_at	TMEM111	-0.198943	0.0133483
									213943_at	205619_s_at	MEOX1	0.231726	0.00327679			213943_at	219222_at	RBKS	-0.198901	0.0133713
									213943_at	204529_s_at	TOX	0.231697	0.00327817			213943_at	212784_at	CIC	-0.198738	0.0134659
									213943_at	202377_at	LEPROT	0.231531	0.00330568			213943_at	211177_s_at	TXNRD2	-0.19873	0.0134659
									213943_at	203159_at	GLS	0.231498	0.0033099			213943_at	220744_s_at	IFT122	-0.198586	0.013529
									213943_at	206245_s_at	IVNS1ABP	0.231478	0.00331171			213943_at	221339_at	OR10C1	-0.198493	0.0135747
									213943_at	203508_at	TNFRSF1B	0.231369	0.00333049			213943_at	210996_s_at	YWHAE	-0.198181	0.0137805
									213943_at	213539_at	CD3D	0.23129	0.00334342			213943_at	202938_x_at	RRP7A / RRP7B	-0.198047	0.0138583
									213943_at	205129_at	NPM3	0.231274	0.0033447			213943_at	200059_s_at	RHOA	-0.19768	0.0140475
									213943_at	218217_at	SCPEP1	0.231128	0.00337076			213943_at	203617_x_at	ELK1	-0.19756	0.0141012
									213943_at	206236_at	GPR4	0.231023	0.00338908			213943_at	209141_at	UBE2G1	-0.19749	0.014144
									213943_at	217819_at	GOLGA7	0.230965	0.00339624			213943_at	215812_s_at	LOC653562 / SLC6A10P	-0.197464	0.0141557
									213943_at	219142_at	RASL11B	0.230908	0.00340531			213943_at	212101_at	KPNA6	-0.197455	0.0141569
									213943_at	214844_s_at	DOK5	0.230835	0.00341738			213943_at	202926_at	NBAS	-0.197377	0.0141989
									213943_at	208415_x_at	ING1	0.2308	0.00342214			213943_at	202495_at	TBCC	-0.197355	0.0142088
									213943_at	201105_at	LGALS1	0.230786	0.00342267			213943_at	201439_at	GBF1	-0.197334	0.014211
									213943_at	219291_at	DTWD1	0.230744	0.0034249			213943_at	202357_s_at	C2 /CFB	-0.197252	0.0142445
									213943_at	220595_at	PDZRN4	0.230688	0.00343378			213943_at	220007_at	METTL8	-0.197145	0.0142956
									213943_at	220731_s_at	NECAP2	0.230574	0.00345226			213943_at	202395_at	NSF	-0.197142	0.0142956
									213943_at	207697_x_at	LILRB2	0.230464	0.00346464			213943_at	201484_at	SUPT4H1	-0.19712	0.014302
									213943_at	206214_at	PLA2G7	0.230459	0.00346464			213943_at	218540_at	THTPA	-0.19709	0.0143155
									213943_at	210044_s_at	LYL1	0.230414	0.00347146			213943_at	220340_at	KIAA1772	-0.197018	0.0143501
									213943_at	217938_s_at	KCMF1	0.230195	0.00350895			213943_at	200923_at	LGALS3BP	-0.196996	0.014359
									213943_at	218247_s_at	MEX3C	0.230149	0.00351331			213943_at	221888_at	CC2D1A	-0.196837	0.0144541
									213943_at	218088_s_at	RRAGC	0.229985	0.00353645			213943_at	201756_at	RPA2	-0.196819	0.0144552
									213943_at	206070_s_at	EPHA3	0.229867	0.00355833			213943_at	218036_x_at	NMD3	-0.196771	0.0144833
									213943_at	219646_at	DEF8	0.229754	0.00357919			213943_at	210761_s_at	GRB7	-0.196682	0.0145403
									213943_at	208961_s_at	KLF6	0.229651	0.0035958			213943_at	221952_x_at	TRMT5	-0.196429	0.0146847
									213943_at	211456_x_at	MT1P2	0.229603	0.00360135			213943_at	203641_s_at	COBLL1	-0.19642	0.0146856
									213943_at	212506_at	PICALM	0.229381	0.00364288			213943_at	219981_x_at	ZNF587	-0.19641	0.0146865
									213943_at	212942_s_at	KIAA1199	0.229303	0.00365478			213943_at	205455_at	MST1R	-0.196386	0.0146978
									213943_at	210260_s_at	TNFAIP8	0.229178	0.0036745			213943_at	202715_at	CAD	-0.196376	0.0146987
									213943_at	202422_s_at	ACSL4	0.228955	0.00371675			213943_at	206574_s_at	PTP4A3	-0.196213	0.0148041
									213943_at	209313_at	GPN1	0.228876	0.00372902			213943_at	201356_at	SF3A1	-0.1961	0.01487
									213943_at	212499_s_at	FCF1 / MAPK1IP1L	0.228329	0.00384202			213943_at	206846_s_at	HDAC6	-0.195937	0.0149742
									213943_at	202440_s_at	ST5	0.228317	0.00384223			213943_at	48030_i_at	C5orf4	-0.195863	0.0150227
									213943_at	48825_at	ING4	0.2283	0.00384379			213943_at	202187_s_at	PPP2R5A	-0.195819	0.0150486
									213943_at	208438_s_at	FGR	0.228187	0.0038617			213943_at	201089_at	ATP6V1B2	-0.195376	0.0153531
									213943_at	212187_x_at	PTGDS	0.228161	0.00386497			213943_at	212306_at	CLASP2	-0.195343	0.0153647
									213943_at	209272_at	NAB1	0.228145	0.00386639			213943_at	207984_s_at	MPP2	-0.195312	0.0153817
									213943_at	203010_at	STAT5A	0.228023	0.00388629			213943_at	213202_at	SETD1A	-0.195183	0.0154659
									213943_at	206932_at	CH25H	0.227973	0.00389514			213943_at	201977_s_at	KIAA0141	-0.19517	0.0154699
									213943_at	203973_s_at	CEBPD	0.227897	0.00390281			213943_at	218556_at	ORMDL2	-0.195059	0.0155474
									213943_at	205573_s_at	SNX7	0.22786	0.00390859			213943_at	212482_at	RMND5A	-0.194797	0.015686
									213943_at	213251_at	SMARCA5	0.227765	0.00392726			213943_at	205037_at	RABL4	-0.194791	0.015686
									213943_at	213220_at	NCRNA00081	0.227699	0.00393982			213943_at	218763_at	STX18	-0.194587	0.0158297
									213943_at	213802_at	PRSS12	0.227681	0.00394143			213943_at	220144_s_at	ANKRD5	-0.194553	0.0158369
									213943_at	203835_at	LRRC32	0.227552	0.00395965			213943_at	38069_at	CLCN7	-0.194505	0.0158673
									213943_at	201154_x_at	RPL4	0.227548	0.00395965			213943_at	204599_s_at	MRPL28	-0.194487	0.0158755
									213943_at	201318_s_at	MYL12A / MYL12B	0.227455	0.00397363			213943_at	221311_x_at	LYRM2	-0.19431	0.0159988
									213943_at	210876_at	ANXA2P1	0.227427	0.00397775			213943_at	206076_at	LRRC23	-0.194221	0.0160617
									213943_at	203980_at	FABP4	0.227276	0.00400241			213943_at	220757_s_at	UBXN6	-0.194037	0.0161851
									213943_at	212711_at	CAMSAP1	0.227173	0.00401636			213943_at	221464_at	OR1D2	-0.193758	0.0163726
									213943_at	213581_at	PDCD2	0.227042	0.00404158			213943_at	208680_at	PRDX1	-0.19365	0.0164446
									213943_at	218067_s_at	ARGLU1	0.227023	0.00404246			213943_at	202228_s_at	NPTN	-0.193568	0.0164911
									213943_at	200788_s_at	PEA15	0.227008	0.00404246			213943_at	220167_s_at	TP53TG3 / TP53TG3	-0.19335	0.0166448
									213943_at	204604_at	PFTK1	0.226915	0.00405757			213943_at	204045_at	TCEAL1	-0.193034	0.0168601
									213943_at	208691_at	TFRC	0.226911	0.00405757			213943_at	202168_at	TAF9	-0.192964	0.0169034
									213943_at	202762_at	ROCK2	0.226718	0.00409339			213943_at	215760_s_at	SBNO2	-0.192942	0.0169144
									213943_at	209369_at	ANXA3	0.226709	0.00409339			213943_at	219148_at	PBK	-0.192929	0.0169177
									213943_at	218100_s_at	IFT57	0.226637	0.00410617			213943_at	201322_at	ATP5B	-0.192875	0.0169533
									213943_at	201166_s_at	PUM1	0.226628	0.00410617			213943_at	204800_s_at	DHRS12	-0.192848	0.0169642
									213943_at	210053_at	TAF5	0.226414	0.00415042			213943_at	221918_at	PCTK2	-0.19282	0.0169802
									213943_at	202294_at	STAG1	0.226407	0.00415042			213943_at	217838_s_at	EVL	-0.192715	0.0170597
									213943_at	214605_x_at	GPR1	0.226379	0.00415474			213943_at	210131_x_at	SDHC	-0.192654	0.0170744
									213943_at	219249_s_at	FKBP10	0.226331	0.00415887			213943_at	207929_at	GRPR	-0.192501	0.0171874
									213943_at	213097_s_at	DNAJC2	0.226081	0.00420784			213943_at	49051_g_at	DTX3	-0.192069	0.0174776
									213943_at	200797_s_at	MCL1	0.226035	0.00421163			213943_at	209300_s_at	NECAP1	-0.191949	0.0175653
									213943_at	203708_at	PDE4B	0.226018	0.00421328			213943_at	222250_s_at	INTS7	-0.191742	0.0177266
									213943_at	217801_at	ATP5E	0.226006	0.00421375			213943_at	41858_at	PGAP2	-0.191672	0.017765
									213943_at	201828_x_at	FAM127A	0.225891	0.00423381			213943_at	202852_s_at	AAGAB	-0.19161	0.0177965
									213943_at	37152_at	PPARD	0.22584	0.00424359			213943_at	203136_at	RABAC1	-0.191549	0.0178342
									213943_at	202419_at	KDSR	0.22581	0.00424828			213943_at	203718_at	PNPLA6	-0.191414	0.0179354
									213943_at	209242_at	PEG3	0.225546	0.00429716			213943_at	210434_x_at	JTB	-0.191365	0.0179637
									213943_at	205593_s_at	PDE9A	0.225443	0.00431954			213943_at	203388_at	ARRB2	-0.191314	0.018
									213943_at	220002_at	KIF26B	0.225235	0.00436494			213943_at	220202_s_at	RC3H2	-0.191181	0.0181072
									213943_at	202393_s_at	KLF10	0.225203	0.00437037			213943_at	200649_at	NUCB1	-0.191014	0.0182179
									213943_at	209576_at	GNAI1	0.225193	0.0043704			213943_at	205219_s_at	GALK2	-0.190935	0.0182754
									213943_at	214769_at	CLCN4	0.225161	0.00437202			213943_at	207326_at	BTC	-0.190927	0.0182754
									213943_at	200963_x_at	RPL31	0.225147	0.00437202			213943_at	210240_s_at	CDKN2D	-0.190878	0.0183025
									213943_at	202776_at	DNTTIP2	0.225086	0.004382			213943_at	212411_at	IMP4	-0.190874	0.0183025
									213943_at	215039_at	HS2ST1 / LOC339524	0.22504	0.00439066			213943_at	209027_s_at	ABI1	-0.190815	0.0183468
									213943_at	202126_at	PRPF4B	0.22502	0.00439324			213943_at	209048_s_at	ZMYND8	-0.190758	0.0183902
									213943_at	212450_at	SECISBP2L	0.224762	0.00444709			213943_at	219283_at	C1GALT1C1	-0.190686	0.018446
									213943_at	219756_s_at	POF1B	0.224624	0.00447752			213943_at	219953_s_at	C11orf17	-0.190635	0.0184763
									213943_at	211750_x_at	TUBA1C	0.224619	0.00447752			213943_at	217796_s_at	NPLOC4	-0.190569	0.018527
									213943_at	212730_at	SYNM	0.224596	0.00448086			213943_at	206357_at	OPA3	-0.190546	0.0185396
									213943_at	209628_at	NXT2	0.22457	0.00448478			213943_at	212437_at	CENPB	-0.190377	0.0186611
									213943_at	202806_at	DBN1	0.224498	0.00449816			213943_at	215004_s_at	SF4	-0.190352	0.0186687
									213943_at	207547_s_at	FAM107A	0.224497	0.00449816			213943_at	210378_s_at	SSNA1	-0.190352	0.0186687
									213943_at	204537_s_at	GABRE	0.224378	0.00452051			213943_at	213912_at	TBC1D30	-0.190305	0.0187027
									213943_at	218047_at	OSBPL9	0.224345	0.00452386			213943_at	204554_at	PPP1R3D	-0.190202	0.0187781
									213943_at	218772_x_at	TMEM38B	0.224331	0.00452496			213943_at	218045_x_at	PTMS	-0.190195	0.0187781
									213943_at	205258_at	INHBB	0.224108	0.00457649			213943_at	205425_at	HIP1	-0.190112	0.0188459
									213943_at	210313_at	LILRA4	0.22407	0.00458231			213943_at	209316_s_at	HBS1L	-0.189972	0.018949
									213943_at	208869_s_at	GABARAPL1	0.223882	0.00462145			213943_at	219239_s_at	ZNF654	-0.189907	0.0189927
									213943_at	203227_s_at	TSPAN31	0.223853	0.0046264			213943_at	200049_at	MYST2	-0.189878	0.0190042
									213943_at	206448_at	ZNF365	0.223746	0.00464883			213943_at	202225_at	---	-0.189735	0.0191084
									213943_at	212845_at	SAMD4A	0.223732	0.00464974			213943_at	201941_at	CPD	-0.18973	0.0191084
									213943_at	207068_at	ZFP37	0.223638	0.00466901			213943_at	204367_at	SP2	-0.189304	0.0194464
									213943_at	213035_at	ANKRD28	0.223575	0.00468021			213943_at	215622_x_at	PHF7	-0.189205	0.019507
									213943_at	200871_s_at	PSAP	0.223324	0.00474065			213943_at	204812_at	ZW10	-0.189164	0.019537
									213943_at	218087_s_at	SORBS1	0.223029	0.00481221			213943_at	218083_at	PTGES2	-0.189112	0.0195731
									213943_at	218329_at	PRDM4	0.222658	0.0048997			213943_at	216267_s_at	TMEM115	-0.189105	0.0195731
									213943_at	219284_at	HSPBAP1	0.222552	0.00492045			213943_at	204408_at	APEX2	-0.189088	0.0195769
									213943_at	213116_at	NEK3	0.222182	0.00500561			213943_at	210706_s_at	RNF24	-0.189	0.0196357
									213943_at	206496_at	FMO3	0.221844	0.00509142			213943_at	212684_at	ZNF3	-0.188962	0.019664
									213943_at	217843_s_at	MED4	0.221756	0.00511316			213943_at	219207_at	EDC3	-0.188849	0.019741
									213943_at	54632_at	THADA	0.221648	0.00513823			213943_at	202212_at	PES1	-0.188719	0.0198377
									213943_at	33736_at	STOML1	0.221606	0.00514735			213943_at	205538_at	CORO2A	-0.188719	0.0198377
									213943_at	204982_at	GIT2	0.221466	0.00517883			213943_at	212329_at	SCAP	-0.188668	0.0198772
									213943_at	204929_s_at	VAMP5	0.221209	0.00523832			213943_at	208786_s_at	MAP1LC3B	-0.188628	0.0199069
									213943_at	205798_at	IL7R	0.220716	0.00535583			213943_at	215239_x_at	ZNF273	-0.188604	0.0199219
									213943_at	210140_at	CST7	0.220625	0.00537977			213943_at	206723_s_at	LPAR2	-0.188546	0.0199609
									213943_at	205922_at	VNN2	0.220488	0.00540848			213943_at	209653_at	KPNA4	-0.188527	0.0199719
									213943_at	213122_at	TSPYL5	0.220488	0.00540848			213943_at	219891_at	PGPEP1	-0.188448	0.0200307
									213943_at	202573_at	CSNK1G2	0.220412	0.00542818			213943_at	218444_at	ALG12	-0.188345	0.0201051
									213943_at	205392_s_at	CCL14 / CCL14-CCL15	0.220294	0.00545748			213943_at	213244_at	SCAMP4	-0.188075	0.020347
									213943_at	214063_s_at	TF	0.220011	0.00553421			213943_at	201003_x_at	RNPEP / TMEM189	-0.188003	0.0204079
									213943_at	203575_at	CSNK2A2	0.220009	0.00553421			213943_at	209171_at	ITPA	-0.187903	0.0204759
									213943_at	206742_at	FIGF	0.219881	0.0055605			213943_at	212114_at	LOC552889	-0.187902	0.0204759
									213943_at	203217_s_at	ST3GAL5	0.219592	0.00564072			213943_at	209725_at	UTP20	-0.1879	0.0204759
									213943_at	215016_x_at	DST	0.219543	0.00564688			213943_at	211721_s_at	ZNF551	-0.187787	0.020577
									213943_at	207979_s_at	CD8B	0.219437	0.0056735			213943_at	218344_s_at	RCOR3	-0.187601	0.0207428
									213943_at	201578_at	PODXL	0.219364	0.00569321			213943_at	218034_at	FIS1	-0.18759	0.0207453
									213943_at	218310_at	KCTD7 /RABGEF1	0.219307	0.00570793			213943_at	204167_at	BTD	-0.187534	0.0207913
									213943_at	203693_s_at	E2F3	0.21925	0.0057194			213943_at	221516_s_at	SMCR7L	-0.187391	0.020906
									213943_at	203687_at	CX3CL1	0.219077	0.00577042			213943_at	218022_at	VRK3	-0.187384	0.020906
									213943_at	219631_at	LRP12	0.219025	0.00578385			213943_at	209586_s_at	PRUNE	-0.187371	0.0209109
									213943_at	214719_at	SLC46A3	0.219001	0.00578843			213943_at	218929_at	CDKN2AIP	-0.187364	0.0209109
									213943_at	204081_at	NRGN	0.218891	0.00581383			213943_at	212219_at	PSME4	-0.187315	0.0209504
									213943_at	203038_at	PTPRK	0.218811	0.00583295			213943_at	208717_at	OXA1L	-0.187251	0.020997
									213943_at	217807_s_at	GLTSCR2	0.218653	0.00587711			213943_at	219872_at	C4orf18	-0.187205	0.0210268
									213943_at	211487_x_at	RPS17	0.218559	0.0058947			213943_at	205142_x_at	ABCD1	-0.187097	0.0211255
									213943_at	46167_at	TTC4	0.218522	0.00590347			213943_at	202758_s_at	RFXANK	-0.18708	0.0211342
									213943_at	219155_at	PITPNC1	0.218466	0.00591462			213943_at	201271_s_at	RALY	-0.186844	0.0213375
									213943_at	210757_x_at	DAB2	0.218459	0.00591462			213943_at	213977_s_at	CIZ1	-0.18681	0.0213581
									213943_at	200018_at	RPS13	0.218369	0.00594022			213943_at	205453_at	HOXB2	-0.186807	0.0213581
									213943_at	45714_at	HCFC1R1	0.218344	0.00594225			213943_at	204980_at	CLOCK	-0.186768	0.0213884
									213943_at	205488_at	GZMA	0.218327	0.00594463			213943_at	203155_at	SETDB1	-0.18669	0.0214504
									213943_at	201506_at	TGFBI	0.218201	0.00597885			213943_at	200691_s_at	HSPA9	-0.186645	0.0214797
									213943_at	204446_s_at	ALOX5	0.218005	0.00603322			213943_at	202528_at	GALE	-0.186601	0.0215154
									213943_at	209674_at	CRY1	0.217849	0.00607804			213943_at	201390_s_at	CSNK2B	-0.186561	0.0215472
									213943_at	219358_s_at	ADAP2	0.217823	0.00608166			213943_at	216338_s_at	YIPF3	-0.186508	0.0215843
									213943_at	219973_at	ARSJ	0.217819	0.00608166			213943_at	205594_at	ZNF652	-0.186491	0.0215936
									213943_at	205848_at	GAS2	0.217788	0.00608602			213943_at	204880_at	MGMT	-0.186213	0.0218105
									213943_at	201470_at	GSTO1	0.217787	0.00608602			213943_at	212228_s_at	COQ9	-0.186194	0.0218171
									213943_at	222161_at	NAALAD2	0.217735	0.00609798			213943_at	214519_s_at	RLN2	-0.18619	0.0218171
									213943_at	201180_s_at	GNAI3	0.217722	0.00609798			213943_at	203591_s_at	CSF3R	-0.186106	0.0218781
									213943_at	200017_at	RPS27A	0.217622	0.00612682			213943_at	203757_s_at	CEACAM6	-0.185823	0.0221517
									213943_at	200029_at	RPL19	0.217616	0.00612682			213943_at	219376_at	ZNF322B	-0.185778	0.0221861
									213943_at	204198_s_at	RUNX3	0.217597	0.00612798			213943_at	209832_s_at	CDT1	-0.185772	0.0221861
									213943_at	203196_at	ABCC4	0.217593	0.00612798			213943_at	218739_at	ABHD5	-0.185766	0.0221861
									213943_at	215051_x_at	AIF1	0.217551	0.00613879			213943_at	212090_at	GRINA	-0.185724	0.0222121
									213943_at	202114_at	SNX2	0.217485	0.00615737			213943_at	212455_at	YTHDC1	-0.185712	0.0222164
									213943_at	203971_at	SLC31A1	0.217451	0.00616567			213943_at	214693_x_at	NBPF10	-0.18559	0.0223302
									213943_at	217823_s_at	UBE2J1	0.217413	0.00617493			213943_at	212175_s_at	AK2	-0.185532	0.0223695
									213943_at	214085_x_at	GLIPR1	0.217137	0.0062549			213943_at	220020_at	XPNPEP3	-0.185506	0.0223811
									213943_at	65472_at	C2orf68	0.216804	0.00635757			213943_at	212957_s_at	LOC92249	-0.185505	0.0223811
									213943_at	201605_x_at	CNN2	0.216605	0.00641337			213943_at	203952_at	ATF6	-0.18545	0.0224051
									213943_at	203166_at	CFDP1	0.216372	0.00648114			213943_at	221534_at	C11orf68	-0.185282	0.0225639
									213943_at	213331_s_at	NEK1	0.216352	0.00648448			213943_at	201485_s_at	RCN2	-0.185228	0.022606
									213943_at	210607_at	FLT3LG	0.21627	0.00650658			213943_at	219910_at	FICD	-0.185226	0.022606
									213943_at	204500_s_at	AGTPBP1	0.216232	0.00651664			213943_at	219332_at	MICALL2	-0.18517	0.0226558
									213943_at	208999_at	SEPT8	0.216166	0.00653622			213943_at	219976_at	HOOK1	-0.185118	0.0226854
									213943_at	219278_at	MAP3K6	0.216017	0.00658225			213943_at	219076_s_at	PXMP2	-0.18507	0.022728
									213943_at	201560_at	CLIC4	0.215913	0.00661219			213943_at	218622_at	NUP37	-0.185032	0.0227502
									213943_at	219947_at	CLEC4A	0.215694	0.00668682			213943_at	203085_s_at	TGFB1	-0.185011	0.0227645
									213943_at	205384_at	FXYD1	0.215623	0.0067087			213943_at	218118_s_at	TIMM23	-0.184911	0.0228495
									213943_at	217873_at	CAB39	0.215529	0.00673919			213943_at	201561_s_at	CLSTN1	-0.184877	0.0228724
									213943_at	222108_at	AMIGO2	0.2155	0.00674611			213943_at	204378_at	BCAS1	-0.184705	0.0230471
									213943_at	205227_at	IL1RAP	0.215391	0.00677181			213943_at	222219_s_at	TLE6	-0.184633	0.0231152
									213943_at	213743_at	CCNT2	0.215225	0.0068253			213943_at	209364_at	BAD	-0.184524	0.0231941
									213943_at	210164_at	GZMB	0.215135	0.00685497			213943_at	211899_s_at	TRAF4	-0.18452	0.0231941
									213943_at	203430_at	HEBP2	0.21502	0.00689005			213943_at	202433_at	SLC35B1	-0.184492	0.0232152
									213943_at	220175_s_at	CBWD1 / CBWD2	0.215006	0.00689199			213943_at	219022_at	C12orf43	-0.184484	0.0232152
									213943_at	209821_at	IL33	0.214959	0.00690199			213943_at	205085_at	ORC1L	-0.184341	0.0233603
									213943_at	205255_x_at	TCF7	0.214739	0.0069732			213943_at	212568_s_at	DLAT	-0.184151	0.0235314
									213943_at	202565_s_at	SVIL	0.214617	0.00701172			213943_at	214919_s_at	ANKHD1-EIF4EBP3 / EIF4EBP3	-0.184112	0.0235607
									213943_at	213680_at	KRT6B	0.214517	0.00704546			213943_at	200947_s_at	GLUD1	-0.183977	0.0236864
									213943_at	202679_at	NPC1	0.214472	0.00705569			213943_at	35685_at	RING1	-0.183751	0.0238993
									213943_at	214030_at	CRYBG3	0.214471	0.00705569			213943_at	218692_at	GOLSYN	-0.183678	0.0239631
									213943_at	203259_s_at	HDDC2	0.214213	0.00713892			213943_at	206346_at	PRLR	-0.183598	0.0240428
									213943_at	211276_at	TCEAL2	0.214157	0.00715313			213943_at	201774_s_at	NCAPD2	-0.183502	0.0241127
									213943_at	215111_s_at	TSC22D1	0.214107	0.00716563			213943_at	214173_x_at	C19orf2	-0.183323	0.0242777
									213943_at	204190_at	USPL1	0.214048	0.0071802			213943_at	205373_at	CTNNA2	-0.183273	0.0243244
									213943_at	214038_at	CCL8	0.214016	0.00718889			213943_at	220368_s_at	SMEK1	-0.183242	0.0243405
									213943_at	221016_s_at	TCF7L1	0.213907	0.00722713			213943_at	219562_at	RAB26	-0.183211	0.0243574
									213943_at	215118_s_at	IGHG1	0.213888	0.00723087			213943_at	217923_at	PEF1	-0.183005	0.0245809
									213943_at	204194_at	BACH1	0.213735	0.00727526			213943_at	207392_x_at	UGT2B15	-0.182946	0.024639
									213943_at	210510_s_at	NRP1	0.21346	0.00737103			213943_at	219709_x_at	FAM173A	-0.182822	0.0247696
									213943_at	219377_at	FAM59A	0.213374	0.00739477			213943_at	205540_s_at	RRAGB	-0.182785	0.0248037
									213943_at	209058_at	EDF1	0.213367	0.00739477			213943_at	218972_at	TTC17	-0.182757	0.0248171
									213943_at	212542_s_at	PHIP	0.213362	0.00739477			213943_at	204972_at	OAS2	-0.182473	0.025088
									213943_at	213164_at	SLC5A3	0.213301	0.00741496			213943_at	205643_s_at	PPP2R2B	-0.1824	0.0251618
									213943_at	205741_s_at	DTNA	0.213256	0.0074293			213943_at	217436_x_at	HLA-J	-0.182276	0.0252871
									213943_at	200012_x_at	RPL21	0.21299	0.00752316			213943_at	202950_at	CRYZ	-0.182265	0.0252901
									213943_at	218856_at	TNFRSF21	0.21297	0.00752404			213943_at	211009_s_at	ZNF271	-0.182218	0.0253177
									213943_at	204512_at	HIVEP1	0.212699	0.00761114			213943_at	221216_s_at	SCMH1	-0.182209	0.0253184
									213943_at	218940_at	C14orf138	0.212686	0.00761114			213943_at	218069_at	DCTPP1	-0.182192	0.0253199
									213943_at	211980_at	COL4A1	0.212483	0.00767474			213943_at	200613_at	AP2M1	-0.182168	0.025339
									213943_at	202298_at	NDUFA1	0.21241	0.0076963			213943_at	207668_x_at	PDIA6	-0.182086	0.025397
									213943_at	221749_at	YTHDF3	0.21235	0.00771716			213943_at	222064_s_at	AARSD1	-0.181925	0.0255573
									213943_at	203534_at	LSM1	0.212266	0.00774759			213943_at	203668_at	MAN2C1	-0.181869	0.0256028
									213943_at	212181_s_at	NUDT4 / NUDT4P1	0.212201	0.00776656			213943_at	40850_at	FKBP8	-0.181845	0.0256226
									213943_at	206283_s_at	TAL1	0.212095	0.00780216			213943_at	218557_at	NIT2	-0.181825	0.0256282
									213943_at	219848_s_at	ZNF432	0.212047	0.00781818			213943_at	202556_s_at	MCRS1	-0.181822	0.0256282
									213943_at	206790_s_at	NDUFB1	0.21201	0.00782967			213943_at	31861_at	IGHMBP2	-0.181816	0.0256282
									213943_at	49306_at	RASSF4	0.211969	0.00784289			213943_at	206303_s_at	NUDT4	-0.1816	0.025836
									213943_at	206631_at	PTGER2	0.211948	0.00784779			213943_at	39763_at	HPX	-0.181567	0.0258569
									213943_at	209840_s_at	LRRN3	0.211735	0.00791674			213943_at	210213_s_at	EIF6	-0.181539	0.0258709
									213943_at	216438_s_at	TMSB4X / TMSL3	0.211579	0.00797072			213943_at	219952_s_at	MCOLN1	-0.181524	0.025879
									213943_at	213811_x_at	TCF3	0.211548	0.00797962			213943_at	205509_at	CPB1	-0.181484	0.0259127
									213943_at	218809_at	PANK2	0.21146	0.00801241			213943_at	208527_x_at	HIST1H2BE	-0.181459	0.0259284
									213943_at	211921_x_at	PTMA	0.211403	0.00802882			213943_at	212453_at	KIAA1279	-0.181367	0.0259984
									213943_at	64900_at	FLJ22167	0.211321	0.00805159			213943_at	213256_at	2003-03-01	-0.181361	0.0259984
									213943_at	204730_at	RIMS3	0.211217	0.00808798			213943_at	219256_s_at	SH3TC1	-0.18136	0.0259984
									213943_at	219065_s_at	DPY30 / MEMO1	0.211175	0.00809816			213943_at	218696_at	EIF2AK3	-0.181297	0.0260546
									213943_at	219966_x_at	BANP	0.211107	0.00811888			213943_at	218176_at	MAGEF1	-0.180988	0.0263764
									213943_at	216336_x_at	MT1E / MT1H	0.210875	0.00819469			213943_at	215364_s_at	KIAA0467	-0.180913	0.0264576
									213943_at	218646_at	C4orf27	0.210862	0.00819621			213943_at	219127_at	ATAD4	-0.1809	0.0264632
									213943_at	214334_x_at	DAZAP2	0.210755	0.00823425			213943_at	204029_at	CELSR2	-0.180878	0.0264767
									213943_at	212493_s_at	SETD2	0.210391	0.00836291			213943_at	220073_s_at	PLEKHG6	-0.180873	0.0264767
									213943_at	206211_at	SELE	0.210274	0.00840001			213943_at	214714_at	ZNF394	-0.180796	0.0265592
									213943_at	213136_at	PTPN2	0.210066	0.00848151			213943_at	217894_at	KCTD3	-0.180781	0.0265685
									213943_at	213355_at	ST3GAL6	0.210061	0.00848151			213943_at	203503_s_at	PEX14	-0.180504	0.0268545
									213943_at	209222_s_at	OSBPL2	0.210016	0.00849125			213943_at	205881_at	ZNF74	-0.180501	0.0268545
									213943_at	202947_s_at	GYPC	0.210012	0.00849125			213943_at	218752_at	ZMAT5	-0.180498	0.0268545
									213943_at	204734_at	KRT15	0.209968	0.00850645			213943_at	217007_s_at	ADAM15	-0.180323	0.027028
									213943_at	203822_s_at	ELF2	0.209928	0.00852014			213943_at	204405_x_at	DIMT1L	-0.180284	0.0270589
									213943_at	218314_s_at	C11orf57	0.209789	0.00857431			213943_at	40837_at	TLE2	-0.180158	0.0271979
									213943_at	202284_s_at	CDKN1A	0.209523	0.0086893			213943_at	211963_s_at	ARPC5	-0.179897	0.0274391
									213943_at	205088_at	MAMLD1	0.209335	0.00875854			213943_at	217919_s_at	MRPL42	-0.179784	0.0275609
									213943_at	201761_at	MTHFD2	0.209243	0.00879147			213943_at	205050_s_at	MAPK8IP2	-0.179472	0.0278919
									213943_at	200095_x_at	RPS10	0.209135	0.00882908			213943_at	205953_at	LRIG2	-0.179344	0.0280053
									213943_at	205372_at	PLAG1	0.20909	0.00884144			213943_at	209179_s_at	MBOAT7	-0.179316	0.0280303
									213943_at	201126_s_at	MGAT1	0.209042	0.00885526			213943_at	204062_s_at	ULK2	-0.179278	0.0280588
									213943_at	213474_at	KCTD7	0.208857	0.00892804			213943_at	209008_x_at	KRT8	-0.179123	0.028226
									213943_at	203133_at	SEC61B	0.20884	0.00893167			213943_at	207269_at	DEFA4	-0.17911	0.0282324
									213943_at	204068_at	STK3	0.208745	0.00896729			213943_at	202182_at	KAT2A	-0.179078	0.028264
									213943_at	220206_at	ZMYM1	0.20848	0.00907863			213943_at	218480_at	AGBL5	-0.179035	0.0283041
									213943_at	203113_s_at	EEF1D	0.208432	0.00909265			213943_at	211754_s_at	SLC25A17	-0.178985	0.0283339
									213943_at	221434_s_at	C14orf156	0.208383	0.00911122			213943_at	202201_at	BLVRB	-0.178954	0.0283521
									213943_at	219286_s_at	RBM15	0.208357	0.00911489			213943_at	203344_s_at	RBBP8	-0.17893	0.0283625
									213943_at	214470_at	KLRB1	0.208304	0.00912716			213943_at	201646_at	SCARB2	-0.178875	0.0284228
									213943_at	218193_s_at	GOLT1B	0.208273	0.00913777			213943_at	219096_at	ARMC7	-0.178791	0.02852
									213943_at	203349_s_at	ETV5	0.208126	0.00919868			213943_at	36004_at	IKBKG	-0.178712	0.0286019
									213943_at	218346_s_at	SESN1	0.208069	0.00922176			213943_at	206918_s_at	CPNE1	-0.178667	0.0286301
									213943_at	219347_at	NUDT15	0.208039	0.00923181			213943_at	200668_s_at	UBE2D3	-0.178548	0.0287736
									213943_at	201225_s_at	SRRM1	0.207941	0.00927433			213943_at	200045_at	ABCF1	-0.178518	0.0287984
									213943_at	214363_s_at	MATR3	0.20792	0.00927569			213943_at	203453_at	SCNN1A	-0.178513	0.0287984
									213943_at	217562_at	FAM5C	0.207886	0.00928343			213943_at	204245_s_at	RPP14	-0.178503	0.0288016
									213943_at	222343_at	BCL2L11	0.207841	0.00929636			213943_at	208140_s_at	LRRC48	-0.178349	0.0289671
									213943_at	218492_s_at	THAP7	0.207775	0.00932341			213943_at	206141_at	MOCS3	-0.17834	0.0289671
									213943_at	200070_at	C2orf24	0.207505	0.00944369			213943_at	204725_s_at	NCK1	-0.178326	0.0289671
									213943_at	221073_s_at	NOD1	0.207276	0.00954894			213943_at	203899_s_at	ASL / CRCP	-0.178321	0.0289671
									213943_at	202468_s_at	CTNNAL1	0.207251	0.00955673			213943_at	202607_at	NDST1	-0.17822	0.029069
									213943_at	203367_at	DUSP14	0.207227	0.00956412			213943_at	216486_x_at	ZNF79	-0.177935	0.0293902
									213943_at	204468_s_at	TIE1	0.207186	0.00958031			213943_at	201393_s_at	IGF2R	-0.177875	0.0294503
									213943_at	213075_at	OLFML2A	0.207135	0.00959612			213943_at	202030_at	BCKDK	-0.177852	0.0294554
									213943_at	205479_s_at	PLAU	0.207063	0.00962313			213943_at	217976_s_at	DYNC1LI1	-0.177588	0.0297477
									213943_at	201058_s_at	MYL9	0.206918	0.00968186			213943_at	215684_s_at	ASCC2	-0.177577	0.0297527
									213943_at	216331_at	ITGA7	0.206899	0.00968644			213943_at	217803_at	GOLPH3	-0.17752	0.0297969
									213943_at	203851_at	IGFBP6	0.206797	0.00972886			213943_at	202337_at	PMF1	-0.177491	0.0298252
									213943_at	204412_s_at	NEFH	0.206576	0.00981709			213943_at	213254_at	ADSL / TNRC6B	-0.177461	0.029855
									213943_at	205266_at	LIF	0.206472	0.00984226			213943_at	202610_s_at	MED14	-0.177322	0.0300097
									213943_at	205044_at	GABRP	0.206299	0.00991308			213943_at	217840_at	DDX41	-0.177284	0.0300399
									213943_at	211069_s_at	SUMO1	0.206297	0.00991308			213943_at	203709_at	PHKG2	-0.177258	0.0300652
									213943_at	201739_at	SGK1	0.206215	0.0099448			213943_at	209615_s_at	PAK1	-0.177007	0.0303801
									213943_at	31845_at	ELF4	0.206207	0.0099448			213943_at	220355_s_at	PBRM1	-0.176876	0.0305193
									213943_at	204774_at	EVI2A	0.206091	0.00999088			213943_at	203588_s_at	TFDP2	-0.176747	0.0306844
									213943_at	207783_x_at	HUWE1	0.205822	0.0101111			213943_at	212739_s_at	NME4	-0.176738	0.0306854
									213943_at	209723_at	SERPINB9	0.205624	0.0101964			213943_at	209965_s_at	RAD51L3	-0.17656	0.0308874
									213943_at	212900_at	SEC24A	0.205623	0.0101964			213943_at	218613_at	PSD3	-0.176498	0.0309588
									213943_at	202672_s_at	ATF3	0.205544	0.0102227			213943_at	218782_s_at	ATAD2	-0.176441	0.0310198
									213943_at	219777_at	GIMAP6	0.205435	0.0102709			213943_at	219023_at	C4orf16	-0.176412	0.031049
									213943_at	220027_s_at	RASIP1	0.205394	0.0102873			213943_at	43934_at	GPR137	-0.176302	0.0311795
									213943_at	203082_at	BMS1	0.205181	0.0103721			213943_at	204149_s_at	GSTM4	-0.176209	0.031276
									213943_at	204011_at	SPRY2	0.205169	0.0103721			213943_at	218030_at	GIT1	-0.17616	0.0313353
									213943_at	208695_s_at	RPL39	0.205164	0.0103721			213943_at	210057_at	SMG1	-0.176056	0.0314466
									213943_at	217853_at	TNS3	0.205093	0.0104046			213943_at	207247_s_at	ZFX / ZFY	-0.176048	0.0314474
									213943_at	218751_s_at	FBXW7	0.204997	0.0104419			213943_at	217466_x_at	RPS2	-0.176036	0.0314539
									213943_at	202325_s_at	ATP5J	0.204856	0.0105114			213943_at	206024_at	HPD	-0.176004	0.0314871
									213943_at	217022_s_at	IGH@ / IGHA1 /	0.204573	0.0106338			213943_at	212946_at	KIAA0564	-0.175867	0.0316506
									213943_at	200625_s_at	CAP1	0.204541	0.0106433			213943_at	202943_s_at	NAGA	-0.175864	0.0316506
									213943_at	200858_s_at	RPS8	0.204505	0.0106584			213943_at	209746_s_at	COQ7	-0.175743	0.0317921
									213943_at	221840_at	PTPRE	0.204469	0.0106735			213943_at	200618_at	LASP1	-0.175707	0.0318005
									213943_at	213058_at	TTC28	0.204335	0.0107407			213943_at	219269_at	HMBOX1	-0.175628	0.0318973
									213943_at	217887_s_at	EPS15	0.204316	0.0107462			213943_at	214892_x_at	C19orf29	-0.175518	0.0320349
									213943_at	204204_at	SLC31A2	0.204198	0.010797			213943_at	215732_s_at	DTX2	-0.175425	0.0321407
									213943_at	205008_s_at	CIB2	0.204182	0.0108006			213943_at	208758_at	ATIC	-0.175383	0.0321899
									213943_at	211628_x_at	FTHP1	0.203991	0.010886			213943_at	204104_at	SNAPC2	-0.175269	0.0323086
									213943_at	208383_s_at	PCK1	0.203751	0.0109972			213943_at	210195_s_at	PSG1	-0.175192	0.0324071
									213943_at	214789_x_at	SFRS2B	0.203748	0.0109972			213943_at	212995_x_at	FAM128B	-0.175131	0.0324745
									213943_at	204573_at	CROT	0.203685	0.0110221			213943_at	212683_at	SLC25A44	-0.175074	0.0325389
									213943_at	206142_at	ZNF135	0.203645	0.0110398			213943_at	215207_x_at	NUS1 / YDD19	-0.175058	0.0325457
									213943_at	203102_s_at	MGAT2	0.203578	0.0110715			213943_at	202939_at	ZMPSTE24	-0.175007	0.0325971
									213943_at	213238_at	ATP10D	0.203553	0.0110785			213943_at	207262_at	APOF	-0.174989	0.0326118
									213943_at	213222_at	PLCB1	0.203548	0.0110785			213943_at	212505_s_at	KIAA0892	-0.174972	0.0326132
									213943_at	202130_at	RIOK3	0.203516	0.0110923			213943_at	218564_at	RFWD3	-0.174897	0.0327112
									213943_at	209570_s_at	D4S234E	0.203272	0.0112153			213943_at	204172_at	CPOX	-0.174786	0.0328598
									213943_at	209447_at	SYNE1	0.20326	0.0112168			213943_at	207010_at	GABRB1	-0.174678	0.0329621
									213943_at	217820_s_at	ENAH	0.203171	0.0112524			213943_at	218159_at	DDRGK1	-0.174661	0.0329647
									213943_at	214951_at	SLC26A10	0.203128	0.0112717			213943_at	211783_s_at	MTA1	-0.174624	0.0330076
									213943_at	204368_at	SLCO2A1	0.203077	0.0112877			213943_at	221586_s_at	E2F5	-0.174453	0.0332234
									213943_at	205421_at	SLC22A3	0.203064	0.0112877			213943_at	218493_at	SNRNP25	-0.174312	0.0333955
									213943_at	206737_at	WNT11	0.203061	0.0112877			213943_at	208833_s_at	ATXN10	-0.174235	0.0334759
									213943_at	205499_at	SRPX2	0.203056	0.0112877			213943_at	212087_s_at	ERAL1	-0.174226	0.0334773
									213943_at	212473_s_at	MICAL2	0.203017	0.0113051			213943_at	209163_at	CYB561	-0.174169	0.0335383
									213943_at	205826_at	MYOM2	0.202809	0.0113992			213943_at	205423_at	AP1B1	-0.174152	0.033542
									213943_at	211012_s_at	LOC161527 / PML	0.202739	0.0114351			213943_at	218025_s_at	PECI	-0.174098	0.0335873
									213943_at	204215_at	C7orf23	0.202664	0.0114678			213943_at	205245_at	PARD6A	-0.17408	0.0336036
									213943_at	218645_at	ZNF277	0.202591	0.0115045			213943_at	203685_at	BCL2	-0.173931	0.0337977
									213943_at	202951_at	STK38	0.202412	0.0115936			213943_at	218086_at	NPDC1	-0.173896	0.0338181
									213943_at	207850_at	CXCL3	0.202405	0.0115936			213943_at	205621_at	ALKBH1	-0.173683	0.0340676
									213943_at	204802_at	RRAD	0.202339	0.0116265			213943_at	218123_at	C21orf59	-0.173528	0.0342319
									213943_at	200891_s_at	SSR1	0.202185	0.0117069			213943_at	215273_s_at	TADA3L	-0.173428	0.03436
									213943_at	204584_at	L1CAM	0.202168	0.0117069			213943_at	219126_at	PHF10	-0.173218	0.0346664
									213943_at	203386_at	TBC1D4	0.202119	0.0117271			213943_at	202176_at	ERCC3	-0.17317	0.0347264
									213943_at	218730_s_at	OGN	0.201987	0.0117822			213943_at	203359_s_at	MYCBP	-0.173092	0.034834
									213943_at	207233_s_at	MITF	0.201978	0.0117826			213943_at	201234_at	ILK	-0.172964	0.0349947
									213943_at	219540_at	ZNF267	0.201925	0.0118036			213943_at	221740_x_at	LRRC37A2	-0.172942	0.0350173
									213943_at	211673_s_at	MOCS1	0.20186	0.0118371			213943_at	211762_s_at	KPNA2	-0.172878	0.0350797
									213943_at	210145_at	PLA2G4A	0.201735	0.0119059			213943_at	219409_at	SNIP1	-0.172815	0.0351652
									213943_at	217945_at	BTBD1	0.201728	0.0119059			213943_at	211578_s_at	RPS6KB1	-0.172804	0.0351703
									213943_at	204396_s_at	GRK5	0.201673	0.0119338			213943_at	208819_at	RAB8A	-0.172765	0.035207
									213943_at	212457_at	TFE3	0.201493	0.0120371			213943_at	212322_at	SGPL1	-0.1727	0.0352959
									213943_at	203494_s_at	CEP57	0.201403	0.0120844			213943_at	217899_at	TMEM214	-0.172623	0.0354022
									213943_at	214614_at	MNX1	0.201396	0.0120844			213943_at	203883_s_at	RAB11FIP2	-0.172613	0.0354065
									213943_at	220059_at	STAP1	0.20134	0.0121141			213943_at	209490_s_at	PPT2	-0.172558	0.0354557
									213943_at	218447_at	C16orf61	0.20129	0.0121391			213943_at	201423_s_at	CUL4A	-0.172514	0.0354723
									213943_at	201409_s_at	PPP1CB	0.201258	0.0121477			213943_at	201251_at	PKM2	-0.172513	0.0354723
									213943_at	210174_at	NR5A2	0.201111	0.0122216			213943_at	208928_at	POR	-0.172507	0.0354723
									213943_at	212236_x_at	KRT17	0.20092	0.0123121			213943_at	203045_at	NINJ1	-0.172502	0.0354723
									213943_at	211950_at	UBR4	0.200861	0.0123379			213943_at	209158_s_at	CYTH2	-0.172294	0.035725
									213943_at	204334_at	KLF7	0.200428	0.0125909			213943_at	55705_at	C19orf22	-0.172225	0.0358201
									213943_at	210078_s_at	KCNAB1	0.200393	0.0126073			213943_at	207222_at	PLA2G10	-0.172067	0.0360554
									213943_at	204906_at	RPS6KA2	0.200179	0.0127211			213943_at	201991_s_at	KIF5B	-0.171934	0.0362418
									213943_at	201938_at	CDK2AP1	0.200108	0.0127611			213943_at	202486_at	AFG3L2	-0.171873	0.0363249
									213943_at	203944_x_at	BTN2A1	0.200066	0.0127709			213943_at	221090_s_at	OGFOD1	-0.171799	0.0364102
									213943_at	209386_at	TM4SF1	0.200066	0.0127709			213943_at	205225_at	ESR1	-0.171797	0.0364102
									213943_at	204078_at	SC65	0.200053	0.0127735			213943_at	209750_at	NR1D2	-0.171692	0.036526
									213943_at	205259_at	NR3C2	0.199989	0.0128033			213943_at	218601_at	URG4	-0.171689	0.036526
									213943_at	205350_at	CRABP1	0.199832	0.0128985			213943_at	208720_s_at	RBM39	-0.17163	0.0366025
									213943_at	210705_s_at	TRIM5	0.19975	0.0129399			213943_at	204178_s_at	RBM14 / RBM4	-0.171616	0.0366133
									213943_at	208450_at	LGALS2	0.199717	0.0129561			213943_at	221647_s_at	RIC8A	-0.171557	0.0366825
									213943_at	213706_at	GPD1	0.19968	0.0129573			213943_at	212776_s_at	OBSL1	-0.171538	0.0367008
									213943_at	204475_at	MMP1	0.199658	0.0129662			213943_at	201630_s_at	ACP1	-0.171497	0.0367544
									213943_at	203645_s_at	CD163	0.19947	0.013077			213943_at	218052_s_at	ATP13A1	-0.171456	0.0368079
									213943_at	215946_x_at	IGLL3	0.19945	0.013084			213943_at	220295_x_at	DEPDC1	-0.17136	0.0369358
									213943_at	202942_at	ETFB	0.199194	0.0132235			213943_at	200068_s_at	CANX	-0.171353	0.0369358
									213943_at	220974_x_at	SFXN3	0.199159	0.0132403			213943_at	215068_s_at	FBXL18	-0.17132	0.0369774
									213943_at	205348_s_at	DYNC1I1	0.199065	0.0132854			213943_at	203156_at	AKAP11	-0.171132	0.0372461
									213943_at	212765_at	CAMSAP1L1	0.199006	0.0133127			213943_at	202424_at	MAP2K2	-0.17113	0.0372461
									213943_at	202351_at	ITGAV	0.198833	0.0134105			213943_at	201106_at	GPX4	-0.170989	0.0374508
									213943_at	218611_at	IER5	0.198724	0.0134659			213943_at	211168_s_at	UPF1	-0.17093	0.037524
									213943_at	204855_at	SERPINB5	0.198692	0.0134817			213943_at	221185_s_at	IQCG	-0.170827	0.037665
									213943_at	214533_at	CMA1	0.198671	0.0134894			213943_at	212534_at	ZNF24	-0.170699	0.0378485
									213943_at	206538_at	MRAS	0.198659	0.0134926			213943_at	213077_at	YTHDC2	-0.170568	0.0380014
									213943_at	214607_at	PAK3	0.198649	0.0134931			213943_at	203530_s_at	STX4	-0.170508	0.0380883
									213943_at	211983_x_at	ACTG1	0.198578	0.013529			213943_at	203675_at	NUCB2	-0.170446	0.0381532
									213943_at	54051_at	PKNOX1	0.198555	0.0135394			213943_at	202866_at	DNAJB12	-0.170044	0.0387828
									213943_at	205295_at	CKMT2	0.198144	0.0137996			213943_at	219683_at	FZD3	-0.17001	0.0388011
									213943_at	205505_at	GCNT1	0.19804	0.0138583			213943_at	214656_x_at	MYO1C	-0.169968	0.0388343
									213943_at	221211_s_at	C21orf7	0.197977	0.0138947			213943_at	212448_at	NEDD4L	-0.169904	0.0389162
									213943_at	202894_at	EPHB4	0.19797	0.0138947			213943_at	37079_at	YDD19	-0.169852	0.0389895
									213943_at	204153_s_at	MFNG	0.197881	0.0139503			213943_at	204212_at	ACOT8	-0.169676	0.0392487
									213943_at	218649_x_at	SDCCAG1	0.197819	0.013985			213943_at	209338_at	TFCP2	-0.169375	0.0397211
									213943_at	210613_s_at	SYNGR1	0.197811	0.013985			213943_at	202752_x_at	SLC7A8	-0.169137	0.0401028
									213943_at	200809_x_at	RPL12	0.197804	0.013985			213943_at	219997_s_at	COPS7B	-0.169077	0.0401809
									213943_at	209395_at	CHI3L1	0.197778	0.0139954			213943_at	211767_at	GINS4	-0.169029	0.0402494
									213943_at	220040_x_at	ZC4H2	0.197773	0.0139954			213943_at	204863_s_at	IL6ST	-0.16902	0.0402528
									213943_at	208864_s_at	TXN	0.197754	0.0140028			213943_at	221614_s_at	RPH3AL	-0.168961	0.0403279
									213943_at	204720_s_at	DNAJC6	0.197664	0.0140484			213943_at	221602_s_at	FAIM3	-0.168907	0.0404086
									213943_at	204859_s_at	APAF1	0.197654	0.0140484			213943_at	221597_s_at	TMEM208	-0.168846	0.0404616
									213943_at	205812_s_at	TMED9	0.197654	0.0140484			213943_at	202716_at	PTPN1	-0.168797	0.0405339
									213943_at	209684_at	RIN2	0.197644	0.0140487			213943_at	203961_at	NEBL	-0.168781	0.0405369
									213943_at	207175_at	ADIPOQ	0.197443	0.0141589			213943_at	217792_at	SNX5	-0.168694	0.0406611
									213943_at	221843_s_at	KIAA1609	0.197336	0.014211			213943_at	207925_at	CST5	-0.168676	0.0406798
									213943_at	218729_at	LXN	0.197303	0.0142271			213943_at	201178_at	FBXO7	-0.168642	0.0407255
									213943_at	206785_s_at	KLRC1 / KLRC2	0.197281	0.0142362			213943_at	209036_s_at	MDH2	-0.168497	0.040939
									213943_at	205013_s_at	ADORA2A /// CYTSA	0.19727	0.0142381			213943_at	202791_s_at	SAPS2	-0.16832	0.0412233
									213943_at	212519_at	UBE2E1	0.197224	0.0142588			213943_at	204130_at	HSD11B2	-0.168284	0.0412735
									213943_at	202910_s_at	CD97	0.197192	0.0142748			213943_at	209421_at	MSH2	-0.168142	0.0414714
									213943_at	218718_at	PDGFC	0.197137	0.0142956			213943_at	205448_s_at	MAP3K12	-0.168098	0.0415362
									213943_at	209612_s_at	ADH1B	0.197083	0.0143155			213943_at	217149_x_at	TNK1	-0.167939	0.041739
									213943_at	209774_x_at	CXCL2	0.197041	0.0143394			213943_at	219197_s_at	SCUBE2	-0.167822	0.0419094
									213943_at	201995_at	EXT1	0.196969	0.0143723			213943_at	202166_s_at	PPP1R2	-0.167574	0.042284
									213943_at	217727_x_at	VPS35	0.196882	0.0144277			213943_at	219734_at	SIDT1	-0.167488	0.0423869
									213943_at	213677_s_at	PMS1	0.196826	0.0144552			213943_at	204545_at	PEX6	-0.167487	0.0423869
									213943_at	210072_at	CCL19	0.196617	0.0145754			213943_at	201342_at	SNRPC	-0.167396	0.0425118
									213943_at	213387_at	ATAD2B	0.196615	0.0145754			213943_at	200794_x_at	DAZAP2	-0.1673	0.0426573
									213943_at	201302_at	ANXA4	0.196578	0.0145921			213943_at	208055_s_at	HERC4	-0.167256	0.042724
									213943_at	203296_s_at	ATP1A2	0.196575	0.0145921			213943_at	220800_s_at	TMOD3	-0.167042	0.0430548
									213943_at	203002_at	AMOTL2	0.196526	0.014621			213943_at	218483_s_at	C11orf60	-0.167002	0.0431059
									213943_at	216873_s_at	ATP8B2	0.196267	0.014771			213943_at	218673_s_at	ATG7	-0.166856	0.0432801
									213943_at	213203_at	SNAPC5	0.196199	0.0148084			213943_at	221772_s_at	PPP2R2D	-0.166732	0.0434639
									213943_at	202778_s_at	ZMYM2	0.196097	0.01487			213943_at	210124_x_at	SEMA4F	-0.166715	0.043471
									213943_at	205992_s_at	IL15	0.196029	0.0149134			213943_at	212348_s_at	KDM1	-0.166713	0.043471
									213943_at	204546_at	KIAA0513	0.195528	0.0152565			213943_at	204952_at	LYPD3	-0.166656	0.0435341
									213943_at	202949_s_at	FHL2	0.195521	0.0152565			213943_at	205698_s_at	MAP2K6	-0.166641	0.0435489
									213943_at	205382_s_at	CFD	0.195451	0.015303			213943_at	214529_at	TSHB	-0.166571	0.0436446
									213943_at	201994_at	MORF4L2	0.195356	0.0153615			213943_at	218966_at	MYO5C	-0.166566	0.0436446
									213943_at	201863_at	FAM32A	0.195196	0.0154628			213943_at	204857_at	MAD1L1	-0.166372	0.0438946
									213943_at	204613_at	PLCG2	0.194982	0.0155989			213943_at	200072_s_at	HNRNPM	-0.166253	0.0440773
									213943_at	201648_at	JAK1	0.194942	0.0156202			213943_at	203550_s_at	FAM189B	-0.166253	0.0440773
									213943_at	221514_at	UTP14A	0.19493	0.0156202			213943_at	209207_s_at	SEC22B	-0.166252	0.0440773
									213943_at	205222_at	EHHADH	0.194929	0.0156202			213943_at	203104_at	CSF1R	-0.16623	0.0440801
									213943_at	201575_at	SNW1	0.194887	0.0156457			213943_at	204174_at	ALOX5AP	-0.166224	0.0440801
									213943_at	32094_at	CHST3	0.194872	0.0156505			213943_at	219221_at	ZBTB38	-0.16622	0.0440801
									213943_at	219010_at	C1orf106	0.194859	0.0156536			213943_at	203334_at	DHX8	-0.166114	0.0442227
									213943_at	54970_at	ZMIZ2	0.194846	0.0156584			213943_at	202520_s_at	MLH1	-0.166067	0.0442555
									213943_at	218963_s_at	KRT23	0.194605	0.0158224			213943_at	208217_at	GABRR2	-0.16606	0.0442555
									213943_at	218707_at	ZNF444	0.194569	0.0158313			213943_at	209137_s_at	USP10	-0.165905	0.0445061
									213943_at	202478_at	TRIB2	0.194569	0.0158313			213943_at	221880_s_at	FAM174B	-0.165711	0.0447579
									213943_at	212426_s_at	YWHAQ	0.194317	0.0159988			213943_at	218282_at	EDEM2	-0.165698	0.0447669
									213943_at	202466_at	POLS	0.194159	0.0161031			213943_at	202217_at	C21orf33 / PWP2	-0.16565	0.0448435
									213943_at	205782_at	FGF7	0.194102	0.0161411			213943_at	208393_s_at	RAD50	-0.165639	0.0448505
									213943_at	219583_s_at	SPATA7	0.19396	0.0162392			213943_at	213132_s_at	MCAT	-0.165629	0.0448568
									213943_at	211986_at	AHNAK	0.193939	0.0162482			213943_at	212406_s_at	PCMTD2	-0.165552	0.044988
									213943_at	206991_s_at	CCR5	0.193933	0.0162482			213943_at	200766_at	CTSD	-0.165544	0.044988
									213943_at	210020_x_at	CALML3	0.19387	0.0162904			213943_at	219395_at	ESRP2	-0.165485	0.045072
									213943_at	202757_at	COBRA1	0.193744	0.016377			213943_at	204350_s_at	MED7	-0.165306	0.045329
									213943_at	205286_at	TFAP2C	0.193629	0.016455			213943_at	212383_at	ATP6V0A1	-0.16528	0.0453499
									213943_at	209659_s_at	CDC16	0.193567	0.0164911			213943_at	202088_at	SLC39A6	-0.165238	0.0454161
									213943_at	220761_s_at	TAOK3	0.19345	0.0165782			213943_at	204001_at	SNAPC3	-0.165004	0.0458077
									213943_at	209373_at	MALL	0.193428	0.0165894			213943_at	208063_s_at	CAPN9	-0.164798	0.0461332
									213943_at	207417_s_at	ZNF177	0.193321	0.016661			213943_at	201740_at	NDUFS3	-0.164687	0.046335
									213943_at	212530_at	NEK7	0.193256	0.016707			213943_at	221449_s_at	ITFG1	-0.164528	0.0466015
									213943_at	209199_s_at	MEF2C	0.193201	0.0167403			213943_at	202070_s_at	IDH3A	-0.16433	0.0469613
									213943_at	203307_at	GNL1	0.193198	0.0167403			213943_at	209042_s_at	UBE2G2	-0.164157	0.0472136
									213943_at	209250_at	DEGS1	0.193083	0.016827			213943_at	204986_s_at	TAOK2	-0.164113	0.0472859
									213943_at	218905_at	INTS8	0.19297	0.0169034			213943_at	201533_at	CTNNB1	-0.164085	0.0473271
									213943_at	206188_at	ZNF623	0.192869	0.0169533			213943_at	203643_at	ERF	-0.163878	0.0476493
									213943_at	209879_at	SELPLG	0.192693	0.017068			213943_at	201277_s_at	HNRNPAB	-0.163865	0.0476618
									213943_at	201406_at	RPL36A	0.192688	0.017068			213943_at	208190_s_at	LSR	-0.163857	0.047662
									213943_at	205101_at	CIITA	0.192657	0.0170744			213943_at	55872_at	ZNF512B	-0.163843	0.0476751
									213943_at	210648_x_at	SNX3	0.192654	0.0170744			213943_at	201480_s_at	SUPT5H	-0.163824	0.047676
									213943_at	204225_at	HDAC4	0.192647	0.0170744			213943_at	209073_s_at	NUMB	-0.163814	0.047676
									213943_at	212614_at	ARID5B	0.19247	0.0172048			213943_at	219980_at	C4orf29	-0.163802	0.047676
									213943_at	213823_at	HOXA11	0.192463	0.0172048			213943_at	200083_at	USP22	-0.163782	0.0476814
									213943_at	209549_s_at	DGUOK	0.192445	0.0172131			213943_at	203175_at	RHOG	-0.163607	0.0479554
									213943_at	221656_s_at	ARHGEF10L	0.19242	0.0172229			213943_at	201674_s_at	AKAP1	-0.16359	0.0479749
									213943_at	210321_at	GZMH	0.192416	0.0172229			213943_at	214736_s_at	ADD1	-0.163483	0.0481751
									213943_at	212843_at	NCAM1	0.19238	0.0172463			213943_at	205441_at	OCEL1	-0.163403	0.0483218
									213943_at	216594_x_at	AKR1C1	0.192334	0.0172781			213943_at	219372_at	IFT81	-0.163369	0.0483739
									213943_at	218252_at	CKAP2	0.192285	0.0173116			213943_at	202383_at	KDM5C	-0.163153	0.0487231
									213943_at	218256_s_at	NUP54	0.19227	0.0173173			213943_at	216548_x_at	HMGB3L1	-0.162777	0.0494146
									213943_at	218788_s_at	SMYD3	0.192053	0.0174849			213943_at	204082_at	PBX3	-0.162759	0.0494361
									213943_at	213923_at	RAP2B	0.191841	0.0176489			213943_at	205401_at	AGPS	-0.162693	0.0495254
									213943_at	201358_s_at	COPB1	0.191731	0.017728			213943_at	204432_at	SOX12	-0.162447	0.0499728
									213943_at	200063_s_at	NPM1	0.191721	0.0177293			* False discovery rate (FDR) control of 5% were applied to correct for multiple testing
									213943_at	203759_at	ST3GAL4	0.191625	0.0177965
									213943_at	218852_at	PPP2R3C	0.191614	0.0177965
									213943_at	202410_x_at	IGF2 / INS-IGF2	0.191588	0.0178078
									213943_at	212549_at	STAT5B	0.191476	0.0178898
									213943_at	212537_x_at	RPL17	0.191378	0.0179592
									213943_at	212535_at	MEF2A	0.191085	0.0181796
									213943_at	212184_s_at	MAP3K7IP2	0.191082	0.0181796
									213943_at	216505_x_at	RPS10P5	0.191019	0.0182179
									213943_at	219062_s_at	ZCCHC2	0.191013	0.0182179
									213943_at	221778_at	JHDM1D	0.190922	0.0182754
									213943_at	217982_s_at	MORF4L1	0.190643	0.0184763
									213943_at	212274_at	LPIN1	0.190502	0.0185721
									213943_at	209667_at	CES2	0.190407	0.0186452
									213943_at	216379_x_at	CD24	0.190403	0.0186452
									213943_at	203913_s_at	HPGD	0.190297	0.0187028
									213943_at	206642_at	DSG1	0.189986	0.018949
									213943_at	221813_at	FBXO42	0.189979	0.018949
									213943_at	205934_at	PLCL1	0.189928	0.0189812
									213943_at	206816_s_at	SPAG8	0.189895	0.0189968
									213943_at	212447_at	KBTBD2	0.189753	0.0191084
									213943_at	202747_s_at	ITM2A	0.189741	0.0191084
									213943_at	219528_s_at	BCL11B	0.189599	0.0192201
									213943_at	209912_s_at	KIAA0415	0.189522	0.0192832
									213943_at	218819_at	INTS6	0.189502	0.0192937
									213943_at	202108_at	PEPD	0.189486	0.019301
									213943_at	218675_at	SLC22A17	0.189465	0.0193131
									213943_at	213589_s_at	B3GNTL1	0.189326	0.0194335
									213943_at	48531_at	TNIP2	0.189268	0.0194716
									213943_at	218162_at	OLFML3	0.189249	0.0194812
									213943_at	205083_at	AOX1	0.189217	0.0195031
									213943_at	218574_s_at	LMCD1	0.1891	0.0195731
									213943_at	206033_s_at	DSC3	0.189058	0.0195895
									213943_at	201889_at	FAM3C	0.189058	0.0195895
									213943_at	212670_at	ELN	0.188921	0.0196947
									213943_at	201212_at	LGMN	0.188863	0.0197408
									213943_at	219363_s_at	MTERFD1	0.188846	0.019741
									213943_at	205207_at	IL6	0.188831	0.0197472
									213943_at	215884_s_at	UBQLN2	0.188573	0.0199435
									213943_at	202644_s_at	TNFAIP3	0.188487	0.0200015
									213943_at	208146_s_at	CPVL	0.18844	0.0200307
									213943_at	203571_s_at	C10orf116	0.188379	0.0200805
									213943_at	212780_at	SOS1	0.188268	0.0201703
									213943_at	213356_x_at	HNRNPA1 / HNRNPA1L1	0.187958	0.0204445
									213943_at	221763_at	JMJD1C	0.187702	0.0206523
									213943_at	217769_s_at	POMP	0.187439	0.0208769
									213943_at	217875_s_at	PMEPA1	0.18741	0.020897
									213943_at	214096_s_at	SHMT2	0.187278	0.0209785
									213943_at	205664_at	KIN	0.187233	0.0210067
									213943_at	207375_s_at	IL15RA	0.187011	0.0211943
									213943_at	201812_s_at	C4orf46 / TOMM7	0.186952	0.0212448
									213943_at	204347_at	AK3L1	0.186859	0.0213304
									213943_at	214745_at	PLCH1	0.186753	0.0213946
									213943_at	213975_s_at	LYZ	0.186677	0.0214551
									213943_at	212793_at	DAAM2	0.186519	0.0215821
									213943_at	213239_at	PIBF1	0.186409	0.0216683
									213943_at	209688_s_at	CCDC93	0.186396	0.0216737
									213943_at	213056_at	FRMD4B	0.186387	0.0216742
									213943_at	212945_s_at	MGA	0.18636	0.0216931
									213943_at	203818_s_at	SF3A3	0.186293	0.0217533
									213943_at	209933_s_at	CD300A	0.186247	0.021792
									213943_at	205379_at	CBR3	0.186223	0.0218076
									213943_at	209842_at	SOX10	0.186159	0.0218398
									213943_at	205878_at	POU6F1	0.186124	0.0218673
									213943_at	209898_x_at	ITSN2	0.18594	0.0220388
									213943_at	204271_s_at	EDNRB	0.185748	0.022196
									213943_at	210944_s_at	CAPN3	0.185586	0.0223302
									213943_at	219666_at	MS4A6A	0.185559	0.0223502
									213943_at	210847_x_at	TNFRSF25	0.185497	0.0223814
									213943_at	212954_at	DYRK4	0.185455	0.0224051
									213943_at	210784_x_at	LILRA6 / LILRB3	0.18545	0.0224051
									213943_at	213933_at	PTGER3	0.185335	0.0225164
									213943_at	202582_s_at	RANBP9	0.18513	0.0226854
									213943_at	221208_s_at	C11orf61	0.185124	0.0226854
									213943_at	213334_x_at	HAUS7	0.185061	0.0227289
									213943_at	206707_x_at	FAM65B	0.184999	0.0227686
									213943_at	215235_at	SPTAN1	0.184906	0.0228495
									213943_at	201871_s_at	UBXN1	0.184598	0.0231441
									213943_at	209757_s_at	MYCN	0.18458	0.0231543
									213943_at	218642_s_at	CHCHD7	0.184572	0.0231543
									213943_at	220418_at	UBASH3A	0.184315	0.0233797
									213943_at	204948_s_at	FST	0.184188	0.0235091
									213943_at	208070_s_at	REV3L	0.184155	0.0235314
									213943_at	219972_s_at	C14orf135	0.184109	0.0235607
									213943_at	214430_at	GLA	0.183983	0.0236864
									213943_at	205801_s_at	RASGRP3	0.183947	0.0237103
									213943_at	221031_s_at	APOLD1	0.183929	0.0237218
									213943_at	213051_at	ZC3HAV1	0.183883	0.0237635
									213943_at	204976_s_at	AMMECR1	0.183701	0.0239464
									213943_at	200833_s_at	hCG_1757335 / RAP1B	0.18355	0.0240866
									213943_at	215515_at	KIRREL	0.183539	0.0240902
									213943_at	203185_at	RASSF2	0.183506	0.0241127
									213943_at	215513_at	HYMAI	0.183413	0.0242038
									213943_at	202242_at	TSPAN7	0.183369	0.0242436
									213943_at	213659_at	ZNF75D	0.18336	0.0242456
									213943_at	201210_at	DDX3X	0.183245	0.0243405
									213943_at	205159_at	CSF2RB	0.183213	0.0243574
									213943_at	203167_at	TIMP2	0.182758	0.0248171
									213943_at	203979_at	CYP27A1	0.182749	0.0248173
									213943_at	205404_at	HSD11B1	0.182668	0.0249006
									213943_at	205718_at	ITGB7	0.182565	0.0250093
									213943_at	214049_x_at	CD7	0.182495	0.0250802
									213943_at	212872_s_at	MED20	0.182485	0.0250833
									213943_at	205168_at	DDR2	0.18235	0.025211
									213943_at	202016_at	MEST	0.18225	0.0252909
									213943_at	202804_at	ABCC1	0.182249	0.0252909
									213943_at	209686_at	S100B	0.182198	0.0253199
									213943_at	218224_at	PNMA1	0.182158	0.0253413
									213943_at	201820_at	KRT5	0.182105	0.0253856
									213943_at	218839_at	HEY1	0.182104	0.0253856
									213943_at	209155_s_at	NT5C2	0.182044	0.0254375
									213943_at	203690_at	TUBGCP3	0.18196	0.0255253
									213943_at	204513_s_at	ELMO1	0.181875	0.0256028
									213943_at	221760_at	MAN1A1	0.181781	0.0256601
									213943_at	210396_s_at	BOLA2 / LOC440354	0.181683	0.0257666
									213943_at	218600_at	LIMD2	0.181653	0.0257931
									213943_at	205340_at	ZBTB24	0.181622	0.0258195
									213943_at	221059_s_at	COTL1	0.181589	0.0258389
									213943_at	219519_s_at	SIGLEC1	0.181555	0.0258612
									213943_at	221680_s_at	ETV7	0.18148	0.0259127
									213943_at	212846_at	RRP1B	0.181435	0.0259464
									213943_at	220239_at	KLHL7	0.181416	0.0259598
									213943_at	204773_at	IL11RA	0.181334	0.02602
									213943_at	216383_at	RPL18A / RPL18AP3	0.181244	0.0261088
									213943_at	217928_s_at	SAPS3	0.181233	0.0261115
									213943_at	214288_s_at	PSMB1	0.181176	0.0261709
									213943_at	203496_s_at	MED1	0.181094	0.0262582
									213943_at	213074_at	PHIP	0.180624	0.0267489
									213943_at	206547_s_at	PPEF1	0.180593	0.0267769
									213943_at	218936_s_at	CCDC59	0.180514	0.0268545
									213943_at	201425_at	ALDH2	0.180439	0.0269112
									213943_at	206545_at	CD28	0.180436	0.0269112
									213943_at	222106_at	PRND	0.180365	0.0269887
									213943_at	210111_s_at	LOC100287552	0.180317	0.027028
									213943_at	212703_at	TLN2	0.180155	0.0271979
									213943_at	207509_s_at	LAIR2	0.180061	0.0273044
									213943_at	210532_s_at	C14orf2	0.180011	0.0273576
									213943_at	204686_at	IRS1	0.179963	0.0273958
									213943_at	219290_x_at	DAPP1	0.17996	0.0273958
									213943_at	219622_at	RAB20	0.179956	0.0273958
									213943_at	219768_at	VTCN1	0.179935	0.0274123
									213943_at	209297_at	ITSN1	0.179901	0.0274391
									213943_at	218345_at	TMEM176A	0.17989	0.0274391
									213943_at	218694_at	ARMCX1	0.17976	0.0275817
									213943_at	214456_x_at	SAA1 / SAA2	0.179743	0.0275921
									213943_at	221847_at	LOC100129361	0.179624	0.0277309
									213943_at	205831_at	CD2	0.179609	0.0277405
									213943_at	203856_at	VRK1	0.179583	0.0277634
									213943_at	219667_s_at	BANK1	0.179464	0.0278919
									213943_at	204606_at	CCL21	0.179457	0.0278919
									213943_at	213930_at	ATG12	0.179445	0.027897
									213943_at	209031_at	CADM1	0.179365	0.0279884
									213943_at	200705_s_at	EEF1B2	0.179302	0.0280375
									213943_at	218791_s_at	C15orf29	0.179268	0.0280616
									213943_at	204193_at	CHKB	0.179129	0.028226
									213943_at	203288_at	KIAA0355	0.179031	0.0283041
									213943_at	220565_at	CCR10	0.178987	0.0283339
									213943_at	214323_s_at	UPF3A	0.178976	0.0283339
									213943_at	209075_s_at	ISCU	0.178976	0.0283339
									213943_at	160020_at	MMP14	0.178941	0.0283591
									213943_at	203531_at	CUL5	0.178752	0.0285602
									213943_at	204977_at	DDX10	0.178689	0.0286214
									213943_at	220276_at	RERGL	0.178681	0.0286225
									213943_at	214451_at	TFAP2B	0.178347	0.0289671
									213943_at	202399_s_at	AP3S2	0.178332	0.0289671
									213943_at	209791_at	PADI2	0.178324	0.0289671
									213943_at	219487_at	BBS10	0.178286	0.0290026
									213943_at	200062_s_at	RPL30	0.178257	0.0290299
									213943_at	201637_s_at	FXR1	0.178173	0.0291111
									213943_at	201427_s_at	SEPP1	0.178172	0.0291111
									213943_at	205281_s_at	PIGA	0.178152	0.0291259
									213943_at	219289_at	HEATR3	0.17797	0.0293549
									213943_at	208959_s_at	ERP44	0.177928	0.0293902
									213943_at	208904_s_at	RPS28	0.177854	0.0294554
									213943_at	205913_at	PLIN1	0.177847	0.0294554
									213943_at	209959_at	NR4A3	0.177705	0.0296339
									213943_at	212837_at	FAM175B	0.177679	0.0296573
									213943_at	206181_at	SLAMF1	0.177656	0.0296777
									213943_at	203563_at	AFAP1	0.177647	0.0296798
									213943_at	206335_at	GALNS	0.177564	0.0297554
									213943_at	213106_at	ATP8A1	0.177559	0.0297554
									213943_at	203845_at	KAT2B	0.177439	0.0298738
									213943_at	222018_at	NACA / NACAP1	0.177343	0.0299924
									213943_at	203712_at	KIAA0020	0.177303	0.0300248
									213943_at	210312_s_at	IFT20	0.177013	0.0303801
									213943_at	218397_at	FANCL	0.177001	0.0303801
									213943_at	201656_at	ITGA6	0.17699	0.0303848
									213943_at	219670_at	BEND5	0.176883	0.0305193
									213943_at	201954_at	ARPC1B	0.176709	0.0307155
									213943_at	202820_at	AHR	0.1767	0.0307158
									213943_at	205202_at	PCMT1	0.176644	0.0307835
									213943_at	219985_at	HS3ST3A1	0.176493	0.0309588
									213943_at	218134_s_at	RBM22	0.176372	0.031094
									213943_at	217092_x_at	RPL7	0.176265	0.0312208
									213943_at	210439_at	ICOS	0.176252	0.0312274
									213943_at	207426_s_at	TNFSF4	0.176111	0.0313917
									213943_at	212110_at	SLC39A14	0.176103	0.0313917
									213943_at	203570_at	LOXL1	0.175964	0.0315318
									213943_at	202933_s_at	YES1	0.175856	0.0316513
									213943_at	201041_s_at	DUSP1	0.175741	0.0317921
									213943_at	201024_x_at	EIF5B	0.175733	0.0317921
									213943_at	40446_at	PHF1	0.175722	0.0317971
									213943_at	221848_at	ZGPAT	0.175704	0.0318005
									213943_at	205591_at	OLFM1	0.175515	0.0320349
									213943_at	203034_s_at	RPL27A	0.175484	0.0320684
									213943_at	213313_at	RABGAP1	0.175371	0.0321962
									213943_at	205200_at	CLEC3B	0.17536	0.0322002
									213943_at	213127_s_at	MED8	0.175328	0.0322358
									213943_at	202074_s_at	OPTN	0.175139	0.0324733
									213943_at	221011_s_at	LBH	0.17507	0.0325389
									213943_at	218952_at	PCSK1N	0.175016	0.0325946
									213943_at	213804_at	INPP5B	0.17498	0.0326132
									213943_at	221718_s_at	AKAP13	0.174774	0.0328672
									213943_at	203878_s_at	MMP11	0.174743	0.0328919
									213943_at	37549_g_at	BBS9	0.174741	0.0328919
									213943_at	218379_at	RBM7	0.174679	0.0329621
									213943_at	213405_at	RAB22A	0.174666	0.0329647
									213943_at	203895_at	PLCB4	0.174554	0.0330981
									213943_at	203964_at	NMI	0.174544	0.0331018
									213943_at	206978_at	CCR2	0.174437	0.0332349
									213943_at	220547_s_at	FAM35A	0.17433	0.0333819
									213943_at	203916_at	NDST2	0.174289	0.0334148
									213943_at	211951_at	NOLC1	0.174284	0.0334148
									213943_at	203436_at	RPP30	0.1742	0.033505
									213943_at	209863_s_at	TP63	0.174159	0.033542
									213943_at	217916_s_at	FAM49B	0.174132	0.0335597
									213943_at	203556_at	ZHX2	0.174106	0.0335873
									213943_at	218200_s_at	NDUFB2	0.174014	0.033689
									213943_at	203179_at	GALT	0.173925	0.0337977
									213943_at	212592_at	IGJ	0.173907	0.0338146
									213943_at	200827_at	PLOD1	0.173822	0.0339174
									213943_at	220794_at	GREM2	0.173719	0.0340593
									213943_at	206552_s_at	TAC1	0.173712	0.0340593
									213943_at	200818_at	ATP5O	0.173697	0.0340593
									213943_at	209101_at	CTGF	0.173697	0.0340593
									213943_at	203824_at	TSPAN8	0.17363	0.0341364
									213943_at	218301_at	RNPEPL1	0.173607	0.0341595
									213943_at	219895_at	FAM70A	0.173586	0.0341797
									213943_at	221700_s_at	UBA52	0.173576	0.0341838
									213943_at	202657_s_at	SERTAD2	0.173545	0.034218
									213943_at	200845_s_at	PRDX6	0.173486	0.0342844
									213943_at	201859_at	SRGN	0.173036	0.0349019
									213943_at	213000_at	MORC3	0.173032	0.0349019
									213943_at	205456_at	CD3E	0.172901	0.0350687
									213943_at	210981_s_at	GRK6	0.172886	0.0350794
									213943_at	205658_s_at	SNAPC4	0.172788	0.0351831
									213943_at	203597_s_at	WBP4	0.172601	0.0354129
									213943_at	203072_at	MYO1E	0.172566	0.0354556
									213943_at	210383_at	SCN1A	0.172535	0.0354723
									213943_at	208374_s_at	CAPZA1	0.172513	0.0354723
									213943_at	206091_at	MATN3	0.172487	0.0354835
									213943_at	207956_x_at	PDS5B	0.17247	0.0354982
									213943_at	212734_x_at	RPL13	0.172452	0.0355143
									213943_at	201535_at	UBL3	0.172431	0.0355359
									213943_at	219736_at	TRIM36	0.172299	0.035725
									213943_at	211038_s_at	CROCCL1	0.172034	0.0360963
									213943_at	209682_at	CBLB	0.171811	0.0364102
									213943_at	210112_at	HPS1	0.171746	0.0364786
									213943_at	215228_at	NHLH2	0.171714	0.0365178
									213943_at	203208_s_at	MTFR1	0.171686	0.036526
									213943_at	213135_at	TIAM1	0.171571	0.0366731
									213943_at	204303_s_at	KIAA0427	0.171389	0.0369027
									213943_at	209770_at	BTN3A1	0.171183	0.0371857
									213943_at	200859_x_at	FLNA	0.17101	0.0374286
									213943_at	204324_s_at	GOLIM4	0.170928	0.037524
									213943_at	32099_at	SAFB2	0.170917	0.0375309
									213943_at	209792_s_at	KLK10	0.170729	0.0378121
									213943_at	220617_s_at	ZNF532	0.170674	0.0378773
									213943_at	218571_s_at	CHMP4A	0.170639	0.0379219
									213943_at	205504_at	BTK	0.170614	0.0379431
									213943_at	214461_at	LBP	0.170611	0.0379431
									213943_at	214028_x_at	TDRD3	0.1705	0.0380883
									213943_at	209748_at	SPAST	0.170448	0.0381532
									213943_at	210073_at	ST8SIA1	0.170209	0.0385323
									213943_at	206697_s_at	HP	0.170094	0.0387106
									213943_at	207900_at	CCL17	0.170026	0.0388003
									213943_at	203625_x_at	SKP2	0.170016	0.0388011
									213943_at	214274_s_at	ACAA1	0.169998	0.0388083
									213943_at	201857_at	ZFR	0.169976	0.0388326
									213943_at	200687_s_at	SF3B3	0.169935	0.0388756
									213943_at	209871_s_at	APBA2	0.169794	0.0390744
									213943_at	201031_s_at	HNRNPH1	0.169768	0.039106
									213943_at	214054_at	DOK2	0.169577	0.0394028
									213943_at	206868_at	STARD8	0.169497	0.0395256
									213943_at	219193_at	WDR70	0.169151	0.040092
									213943_at	219654_at	PTPLA	0.169119	0.0401204
									213943_at	204750_s_at	DSC2	0.168967	0.0403279
									213943_at	206106_at	MAPK12	0.168894	0.0404163
									213943_at	206682_at	CLEC10A	0.168885	0.0404163
									213943_at	205204_at	NMB	0.16888	0.0404163
									213943_at	209928_s_at	MSC	0.168788	0.0405357
									213943_at	221253_s_at	TXNDC5	0.168701	0.0406611
									213943_at	206907_at	TNFSF9	0.168582	0.0408172
									213943_at	212643_at	MAPK1IP1L	0.168525	0.0409035
									213943_at	219825_at	CYP26B1	0.168397	0.0411021
									213943_at	200031_s_at	RPS11	0.168232	0.041352
									213943_at	212953_x_at	CALR	0.168203	0.04139
									213943_at	213377_x_at	RPS12	0.16816	0.0414523
									213943_at	200036_s_at	RPL10A	0.168086	0.0415445
									213943_at	201134_x_at	COX7C	0.168053	0.0415765
									213943_at	213260_at	FOXC1	0.168053	0.0415765
									213943_at	220036_s_at	LMBR1L	0.168031	0.0416015
									213943_at	214219_x_at	MAP4K1	0.167984	0.0416723
									213943_at	201921_at	GNG10	0.167823	0.0419094
									213943_at	201441_at	COX6B1	0.167821	0.0419094
									213943_at	201257_x_at	RPS3A	0.167806	0.0419228
									213943_at	202414_at	ERCC5	0.167794	0.041931
									213943_at	202557_at	HSPA13	0.167722	0.0420451
									213943_at	204706_at	INPP5E	0.167659	0.0421444
									213943_at	219304_s_at	PDGFD	0.167552	0.0423101
									213943_at	209892_at	FUT4	0.167528	0.0423408
									213943_at	218396_at	VPS13C	0.167462	0.0424196
									213943_at	205498_at	GHR	0.167445	0.0424362
									213943_at	204163_at	EMILIN1	0.167333	0.0426113
									213943_at	213922_at	TTBK2	0.167226	0.0427557
									213943_at	202231_at	EIF3M	0.167224	0.0427557
									213943_at	205821_at	KLRK1	0.167043	0.0430548
									213943_at	210683_at	NRTN	0.167037	0.0430548
									213943_at	205673_s_at	ASB9	0.166981	0.0431296
									213943_at	219476_at	C1orf116	0.166966	0.0431439
									213943_at	204282_s_at	FARS2	0.166945	0.0431689
									213943_at	205443_at	SNAPC1	0.166913	0.0432126
									213943_at	201429_s_at	RPL37A	0.166865	0.0432801
									213943_at	218356_at	FTSJ2	0.166854	0.0432801
									213943_at	206404_at	FGF9	0.166774	0.0434135
									213943_at	201998_at	ST6GAL1	0.166739	0.043463
									213943_at	218476_at	POMT1	0.166702	0.0434765
									213943_at	218113_at	TMEM2	0.166695	0.0434768
									213943_at	209143_s_at	CLNS1A	0.166593	0.0436241
									213943_at	200873_s_at	CCT8	0.166559	0.0436446
									213943_at	205098_at	CCR1	0.166519	0.0437051
									213943_at	208815_x_at	HSPA4	0.166448	0.0438225
									213943_at	213212_x_at	FLJ40113 / LOC440295	0.166437	0.0438299
									213943_at	202897_at	SIRPA	0.166397	0.0438864
									213943_at	204205_at	APOBEC3G	0.166391	0.0438864
									213943_at	200673_at	LAPTM4A	0.166379	0.0438946
									213943_at	217870_s_at	CMPK1	0.166234	0.0440801
									213943_at	218991_at	HEATR6	0.166173	0.0441554
									213943_at	213306_at	MPDZ	0.166127	0.0442227
									213943_at	207513_s_at	ZNF189	0.166121	0.0442227
									213943_at	205174_s_at	QPCT	0.166104	0.0442286
									213943_at	208855_s_at	STK24	0.166081	0.0442555
									213943_at	219471_at	C13orf18	0.16606	0.0442555
									213943_at	210035_s_at	RPL5 / SNORA66	0.166001	0.0443516
									213943_at	202378_s_at	LEPROT	0.165903	0.0445061
									213943_at	207543_s_at	P4HA1	0.165883	0.0445222
									213943_at	221829_s_at	TNPO1	0.165876	0.0445222
									213943_at	222149_x_at	GOLGA8C / GOLGA8D	0.165873	0.0445222
									213943_at	219494_at	RAD54B	0.165836	0.0445766
									213943_at	206927_s_at	GUCY1A2	0.165775	0.0446783
									213943_at	221213_s_at	ZNF280D	0.165766	0.0446815
									213943_at	205990_s_at	WNT5A	0.165739	0.0447181
									213943_at	219623_at	ACTR5	0.165533	0.044995
									213943_at	221569_at	AHI1	0.16546	0.0451051
									213943_at	216348_at	RPS17P5	0.165348	0.0452801
									213943_at	201380_at	CRTAP	0.165347	0.0452801
									213943_at	218970_s_at	CUTC	0.165346	0.0452801
									213943_at	204362_at	SKAP2	0.165332	0.0452928
									213943_at	221899_at	N4BP2L2	0.165284	0.0453499
									213943_at	204175_at	ZNF593	0.165154	0.0455619
									213943_at	35156_at	R3HCC1	0.165127	0.0455936
									213943_at	209836_x_at	BOLA2 / BOLA2B	0.165123	0.0455936
									213943_at	212750_at	PPP1R16B	0.164912	0.0459657
									213943_at	205752_s_at	GSTM5	0.164907	0.0459657
									213943_at	204602_at	DKK1	0.164871	0.0460218
									213943_at	219218_at	BAHCC1	0.164812	0.0461215
									213943_at	213111_at	PIKFYVE	0.164656	0.0463812
									213943_at	219765_at	ZNF329	0.164598	0.0464793
									213943_at	213148_at	C2orf72	0.164499	0.0466437
									213943_at	203329_at	PTPRM	0.164322	0.0469617
									213943_at	219021_at	RNF121	0.164261	0.047068
									213943_at	211339_s_at	ITK	0.164225	0.0471249
									213943_at	217905_at	C10orf119	0.164164	0.0472136
									213943_at	200037_s_at	CBX3	0.164163	0.0472136
									213943_at	201738_at	EIF1B	0.164057	0.0473689
									213943_at	204137_at	GPR137B	0.163997	0.0474728
									213943_at	219497_s_at	BCL11A	0.163983	0.0474818
									213943_at	219484_at	HCFC2	0.163978	0.0474818
									213943_at	204834_at	FGL2	0.163958	0.047506
									213943_at	208672_s_at	SFRS3	0.163817	0.047676
									213943_at	204854_at	GPR162 / LEPREL2	0.163806	0.047676
									213943_at	218103_at	FTSJ3	0.163792	0.047676
									213943_at	205428_s_at	CALB2	0.163791	0.047676
									213943_at	213345_at	NFATC4	0.163709	0.0478118
									213943_at	213437_at	RUFY3	0.163676	0.0478623
									213943_at	204201_s_at	PTPN13	0.163668	0.0478631
									213943_at	205467_at	CASP10	0.16365	0.0478845
									213943_at	212976_at	LRRC8B	0.163243	0.0486137
									213943_at	219885_at	SLFN12	0.163222	0.0486419
									213943_at	204912_at	IL10RA	0.163208	0.0486566
									213943_at	204579_at	FGFR4	0.163182	0.0486936
									213943_at	205263_at	BCL10	0.163174	0.0486936
									213943_at	210605_s_at	MFGE8	0.163067	0.0488814
									213943_at	50400_at	PAOX	0.162959	0.0490859
									213943_at	201865_x_at	NR3C1	0.16286	0.0492742
									213943_at	207643_s_at	TNFRSF1A	0.162814	0.0493521
									213943_at	214772_at	C11orf41	0.16275	0.0494383
									213943_at	213687_s_at	RPL35A	0.162727	0.0494726
									213943_at	212557_at	ZNF451	0.162647	0.0496057
									213943_at	209124_at	MYD88	0.162478	0.0499405
									213943_at	214700_x_at	RIF1	0.16247	0.0499406
									213943_at	200061_s_at	RPS24	0.162428	0.0499972
									* False discovery rate (FDR) of 5% were applied to correct for multiple testing

## Sheet: Table S10
	Table S10: Significant pathways predicted from KEGG database in LNN/ER-positive patients
		Map title	Category	Gene name	Fisher's exact P value
	1	Focal adhesion(hsa04510)	Cell Communication/Cellular Processes	ACTN1(87), ACTN4(81), AKT1(207), AKT3(10000), BIRC2(329), CAV1(857), CAV2(858), CCND1(595), CCND2(894), COL11A1(1301), COL1A1(1277), COL1A2(1278), COL3A1(1281), COL5A1(1289), COL5A2(1290), COL6A1(1291), COL6A3(1293), COMP(1311), EGFR(1956), FIGF(2277), FLNC(2318), FLT1(2321), FN1(2335), FYN(2534), GRLF1(2909), HGF(3082), IGF1(3479), IGF1R(3480), ITGA5(3678), ITGB1(3688), ITGB5(3693), ITGB6(3694),…	1e-08
	2	ECM-receptor interaction(hsa04512)	Signaling Molecules and Interaction/Environmental Information Processing	CD47(961), COL11A1(1301), COL1A1(1277), COL1A2(1278), COL3A1(1281), COL5A1(1289), COL5A2(1290), COL6A1(1291), COL6A3(1293), COMP(1311), FN1(2335), HSPG2(3339), ITGA5(3678), ITGB1(3688), ITGB5(3693), ITGB6(3694), LAMA2(3908), LAMA4(3910), LAMB1(3912), LAMC1(3915), RELN(5649), SDC2(6383), SDC4(6385), SV2B(9899), THBS2(7058), TNC(3371), TNN(63923), TNXB(7148), VWF(7450),	9.9e-07
	3	TGF-beta signaling pathway(hsa04350)	Signal Transduction/Environmental Information Processing	ACVR1(90), ACVR2A(92), AMH(268), BMPR1B(658), COMP(1311), CUL1(8454), DCN(1634), E2F4(1874), ID2(3398), ID3(3399), ID4(3400), INHBA(3624), INHBB(3625), LTBP1(4052), PPP2CA(5515), PPP2R1A(5518), ROCK2(9475), SMAD2(4087), SMAD6(4091), SMURF2(64750), TFDP1(7027), TGFBR2(7048), THBS2(7058), ZFYVE16(9765),	0.00026175
	4	Ribosome(hsa03010)	Translation/Genetic Information Processing	FAU(2197), RPL14(9045), RPL15(6138), RPL17(6139), RPL22(6146), RPL23(9349), RPL24(6152), RPL27(6155), RPL31(6160), RPL32(6161), RPL34(6164), RPL36(25873), RPL37(6167), RPL38(6169), RPL4(6124), RPL5(6125), RPLP2(6181), RPS20(6224), RPS21(6227), RPS23(6228), RPS25(6230), RPS29(6235), RPSA(3921), RSL24D1(51187),	0.00092669
	5	Acute myeloid leukemia(hsa05221)	Cancers/Human Diseases	AKT1(207), AKT3(10000), ARAF(369), CCND1(595), JUP(3728), KIT(3815), NFKB1(4790), PIK3CD(5293), PIM1(5292), PPARD(5467), RELA(5970), RUNX1T1(862), SOS1(6654), SOS2(6655), STAT3(6774), STAT5A(6776), TCF7L2(6934),	0.00127833
	6	Epithelial cell signaling in Helicobacter pylori infection(hsa05120)	Infectious Diseases/Human Diseases	ATP6AP1(537), ATP6V0C(527), ATP6V0D1(9114), ATP6V0E1(8992), ATP6V1C1(528), ATP6V1G1(9550), CCL5(6352), EGFR(1956), F11R(50848), JAM2(58494), JAM3(83700), JUN(3725), MAP2K4(6416), MAPK13(5603), MET(4233), NFKB1(4790), NFKBIA(4792), PTPRZ1(5803), RELA(5970),	0.00128268
	7	Lysosome(hsa04142)	Transport and Catabolism/Cellular Processes	AP1M2(10053), AP3B1(8546), AP3S1(1176), ASAH1(427), ATP6AP1(537), ATP6V0C(527), ATP6V0D1(9114), CLN3(1201), CTNS(1497), CTSK(1513), CTSL1(1514), DNASE2(1777), GAA(2548), GGA2(23062), GGA3(23163), GLB1(2720), GNPTAB(79158), GNS(2799), IDS(3423), IDUA(3425), LAMP1(3916), NAGLU(4669), NAPSA(9476), NEU1(4758), NPC2(10577), PSAP(5660), SLC11A2(4891), SLC17A5(26503),	0.00264562
	8	Pathways in cancer(hsa05200)	Cancers/Human Diseases	AKT1(207), AKT3(10000), AR(367), ARAF(369), BIRC2(329), CCND1(595), CDKN2A(1029), DVL1(1855), DVL3(1857), EGFR(1956), EGLN2(112398), EPAS1(2034), FAS(355), FGF1(2246), FIGF(2277), FN1(2335), FOXO1(2308), FZD10(11211), FZD1(8321), FZD2(2535), FZD7(8324), HGF(3082), HIF1A(3091), HSP90AB1(3326), IGF1(3479), IGF1R(3480), IL6(3569), ITGB1(3688), JUN(3725), JUP(3728), KIT(3815), LAMA2(3908), LAMA4(3910…	0.00303737
	9	Prostate cancer(hsa05215)	Cancers/Human Diseases	AKT1(207), AKT3(10000), AR(367), ARAF(369), CCND1(595), CREB1(1385), CREB3(10488), CREB3L4(148327), EGFR(1956), FOXO1(2308), HSP90AB1(3326), IGF1(3479), IGF1R(3480), NFKB1(4790), NFKBIA(4792), PDGFRA(5156), PDGFRB(5159), PIK3CD(5293), RELA(5970), SOS1(6654), SOS2(6655), TCF7L2(6934),	0.00311867
	10	Phagosome(hsa04145)	Transport and Catabolism/Cellular Processes	ATP6AP1(537), ATP6V0C(527), ATP6V0D1(9114), ATP6V0E1(8992), ATP6V1C1(528), ATP6V1G1(9550), C1R(715), C3(718), COLEC11(78989), COLEC12(81035), COMP(1311), CTSL1(1514), FCGR3A(2214), HGS(9146), HLA-E(3133), ITGA5(3678), ITGB1(3688), ITGB5(3693), LAMP1(3916), MRC1(4360), MRC2(9902), RAB5B(5869), SCARB1(949), SEC61A1(29927), SEC61A2(55176), SFTPA1(653509), STX7(8417), TFRC(7037), THBS2(7058), TUBA1A(…	0.00480355
	11	Leukocyte transendothelial migration(hsa04670)	Immune System/Organismal Systems	ACTN1(87), ACTN4(81), ARHGAP35(2909), CD99(4267), CDH5(1003), CLDN5(7122), CLDN7(1366), CLDN8(9073), CTNND1(1500), CXCL12(6387), CXCR4(7852), F11R(50848), GNAI1(2770), ITGB1(3688), JAM2(58494), JAM3(83700), MAPK13(5603), MMP2(4313), MYL12A(10627), MYL12B(103910), OCLN(100506658), PECAM1(5175), PIK3CD(5293), ROCK2(9475), THY1(7070), VCAM1(7412),	0.00580376
	12	Adherens junction(hsa04520)	Cell Communication/Cellular Processes	ACTN1(87), ACTN4(81), CSNK2A2(1459), CTNND1(1500), EGFR(1956), FYN(2534), IGF1R(3480), MET(4233), NLK(51701), PTPRB(5787), PVRL2(5819), SMAD2(4087), SNAI2(6591), SORBS1(10580), TCF7L2(6934), TGFBR2(7048), WASF1(8936), WASF3(10810),	0.00734565
	13	mTOR signaling pathway(hsa04150)	Signal Transduction/Environmental Information Processing	AKT1(207), AKT3(10000), EIF4B(1975), EIF4E2(9470), EIF4E(1977), FIGF(2277), HIF1A(3091), IGF1(3479), MLST8(64223), PIK3CD(5293), RPS6KA3(6197), TSC2(7249), ULK1(8408), VEGFC(7424),	0.00769195
	14	Protein processing in endoplasmic reticulum(hsa04141)	Folding, Sorting and Degradation/Genetic Information Processing	AMFR(267), CAPN1(823), CKAP4(10970), CRYAB(1410), CUL1(8454), DDOST(1650), DNAJB1(3337), DNAJC10(54431), DNAJC1(64215), EDEM3(80267), EIF2AK1(27102), EIF2AK2(5610), ERP29(10961), GANAB(23193), HSP90AB1(3326), HSPA5(3309), LMAN1(3998), LMAN2(10960), MAP3K5(4217), MOGS(7841), NSFL1C(55968), PDIA3(2923), PPP1R15A(23645), SAR1A(56681), SEC23A(10484), SEC23B(10483), SEC61A1(29927), SEC61A2(55176), SSR…	0.00869366
	15	D-Glutamine and D-glutamate metabolism(hsa00471)	Metabolism of Other Amino Acids/Metabolism	GLS2(27165), GLS(2744), GLUD2(2747),	0.00892755
	16	Endocytosis(hsa04144)	Transport and Catabolism/Cellular Processes	ADRB2(154), AGAP1(116987), ARAP3(64411), ARFGAP2(84364), CAV1(857), CAV2(858), CHMP1B(57132), CHMP2B(25978), CXCR4(7852), DNM1(1759), DNM2(1785), DNM3(26052), EGFR(1956), EHD2(30846), EHD3(30845), ERBB3(2065), FLT1(2321), FOLR2(2350), GIT2(9815), HGS(9146), HLA-E(3133), IGF1R(3480), KIT(3815), MET(4233), PDGFRA(5156), PIP5K1A(8394), PIP5K1C(23396), PSD4(23550), RAB31(11031), RAB5B(5869), RABEP1(9…	0.00900543
	17	Adipocytokine signaling pathway(hsa04920)	Endocrine System/Organismal Systems	ACACB(32), ACSL1(2180), ACSL4(2182), ADIPOR1(51094), AKT1(207), AKT3(10000), IRS2(8660), LEPR(3953), NFKB1(4790), NFKBIA(4792), PRKAB1(5564), PRKAG1(5571), PRKAG2(51422), RELA(5970), RXRB(6257), STAT3(6774), TNFRSF1B(7133),	0.00911844
	18	Base excision repair(hsa03410)	Replication and Repair/Genetic Information Processing	HMGB1(3146), LIG3(3980), MPG(4350), PARP3(10039), POLD2(5425), POLD3(10714), POLD4(57804), POLE3(54107), SMUG1(23583), TDG(6996),	0.00969071
	19	Wnt signaling pathway(hsa04310)	Signal Transduction/Environmental Information Processing	CCND1(595), CCND2(894), CSNK2A2(1459), CUL1(8454), DVL1(1855), DVL3(1857), FZD10(11211), FZD1(8321), FZD2(2535), FZD7(8324), JUN(3725), LRP6(4040), MMP7(4316), NLK(51701), PLCB3(5331), PPARD(5467), PPP2CA(5515), PPP2R1A(5518), PPP3CB(5532), PRKACB(5567), ROCK2(9475), RUVBL1(8607), SENP2(59343), SFRP1(6422), SFRP4(6424), SMAD2(4087), TBL1XR1(79718), TCF7L2(6934), WNT2(7472), WNT5B(81029), WNT6(747…	0.0105552
	20	Amoebiasis(hsa05146)	Infectious Diseases/Human Diseases	ACTN1(87), ACTN4(81), COL11A1(1301), COL1A1(1277), COL1A2(1278), COL3A1(1281), COL5A1(1289), COL5A2(1290), FN1(2335), IL1R1(3554), IL1R2(7850), IL6(3569), LAMA2(3908), LAMA4(3910), LAMB1(3912), LAMC1(3915), NFKB1(4790), PIK3CD(5293), PLCB3(5331), PRKACB(5567), RAB5B(5869), RELA(5970), SERPINB1(1992),	0.0135235
	21	Prion diseases(hsa05020)	Neurodegenerative Diseases/Human Diseases	C7(730), CCL5(6352), EGR1(1958), FYN(2534), HSPA5(3309), IL6(3569), LAMC1(3915), NOTCH1(4851), PRKACB(5567), PRNP(5621),	0.0149456
	22	Gap junction(hsa04540)	Cell Communication/Cellular Processes	ADCY2(108), ADCY6(112), ADCY7(113), EGFR(1956), GNAI1(2770), GUCY1A3(2982), HTR2B(3357), ITPR2(3709), ITPR3(3710), LPAR1(1902), PDGFRA(5156), PDGFRB(5159), PLCB3(5331), PRKACB(5567), SOS1(6654), SOS2(6655), TUBA1A(7846), TUBA1C(84790), TUBB2B(347733), TUBB6(84617),	0.0158767
	23	Malaria(hsa05144)	Infectious Diseases/Human Diseases	CD40(958), COMP(1311), DARC(2532), HGF(3082), IL6(3569), LRP1(4035), MET(4233), PECAM1(5175), SDC2(6383), SDC4(6385), SELP(6403), THBS2(7058), VCAM1(7412),	0.0160206
	24	Protein digestion and absorption(hsa04974)	Digestive System/Organismal Systems	ATP1B3(483), COL11A1(1301), COL14A1(7373), COL15A1(1306), COL18A1(80781), COL1A1(1277), COL1A2(1278), COL3A1(1281), COL5A1(1289), COL5A2(1290), COL6A1(1291), COL6A3(1293), DPP4(1803), KCNN4(3783), MME(4311), SLC1A5(6510), SLC36A1(206358), SLC7A9(11136),	0.0214486
	25	Pyrimidine metabolism(hsa00240)	Nucleotide Metabolism/Metabolism	DCTD(1635), DPYD(1806), ENTPD1(953), ENTPD6(955), NME6(10201), NT5E(4907), POLD2(5425), POLD3(10714), POLD4(57804), POLE3(54107), POLR2C(5432), POLR2E(5434), POLR2J2(246721), POLR2J3(548644), POLR2J(5439), POLR3E(55718), POLR3G(10622), POLR3K(51728), TK1(7083), TK2(7084), UPP1(7378),	0.0251246
	26	Hypertrophic cardiomyopathy (HCM)(hsa05410)	Cardiovascular Diseases/Human Diseases	CACNA1D(776), DMD(1756), IGF1(3479), IL6(3569), ITGA5(3678), ITGB1(3688), ITGB5(3693), ITGB6(3694), LAMA2(3908), LMNA(4000), PRKAB1(5564), PRKAG1(5571), PRKAG2(51422), SGCB(6443), SGCD(6444), TNNC1(7134), TPM1(7168), TPM2(7169),	0.0270535
	27	Melanogenesis(hsa04916)	Endocrine System/Organismal Systems	ADCY2(108), ADCY6(112), ADCY7(113), CREB1(1385), CREB3(10488), CREB3L4(148327), DVL1(1855), DVL3(1857), EDN1(1906), FZD10(11211), FZD1(8321), FZD2(2535), FZD7(8324), GNAI1(2770), KIT(3815), PLCB3(5331), PRKACB(5567), TCF7L2(6934), WNT2(7472), WNT5B(81029), WNT6(7475),	0.0278252
	28	Proximal tubule bicarbonate reclamation(hsa04964)	Excretory System/Organismal Systems	AQP1(358), ATP1B3(483), GLS2(27165), GLS(2744), GLUD2(2747), SLC25A10(1468), SLC38A3(10991),	0.0281698
	29	Tight junction(hsa04530)	Cell Communication/Cellular Processes	ACTN1(87),	0.0296395
	30	Tight junction(hsa04530)	Cell Communication/Cellular Processes	ACTN1(87), ACTN4(81), AKT1(207), AKT3(10000), CLDN5(7122), CLDN7(1366), CLDN8(9073), CSDA(8531), CSNK2A2(1459), CTTN(2017), EPB41L2(2037), F11R(50848), GNAI1(2770), JAM2(58494), JAM3(83700), LLGL2(3993), MAGI1(9223), MYH11(4629), MYL12A(10627), MYL12B(103910), OCLN(100506658), PPP2CA(5515), PPP2R1A(5518), PRKCD(5580), PRKCE(5581), TJP3(27134),	0.0296395
	31	Dilated cardiomyopathy (DCM)(hsa05414)	Cardiovascular Diseases/Human Diseases	ADCY2(108), ADCY6(112), ADCY7(113), CACNA1D(776), DMD(1756), IGF1(3479), ITGA5(3678), ITGB1(3688), ITGB5(3693), ITGB6(3694), LAMA2(3908), LMNA(4000), PLN(5350), PRKACB(5567), SGCB(6443), SGCD(6444), TNNC1(7134), TPM1(7168), TPM2(7169),	0.0305443
	32	Glycosaminoglycan degradation(hsa00531)	Glycan Biosynthesis and Metabolism/Metabolism	GLB1(2720), GNS(2799), HYAL2(8692), IDS(3423), IDUA(3425), NAGLU(4669),	0.0346188
	33	Vascular smooth muscle contraction(hsa04270)	Circulatory System/Organismal Systems	ACTA2(59), ADCY2(108), ADCY6(112), ADCY7(113), ARAF(369), ARHGEF11(9826), CACNA1D(776), EDNRA(1909), GNA12(2768), GUCY1A3(2982), ITPR2(3709), ITPR3(3710), MYH11(4629), MYL6(4637), MYLK(4638), NPR2(4882), PLCB3(5331), PPP1CA(5499), PPP1R12A(4659), PRKACB(5567), PRKCD(5580), PRKCE(5581), ROCK2(9475),	0.0365872
	34	Mineral absorption(hsa04978)	Digestive System/Organismal Systems	ATP1B3(483), ATP7A(538), FTL(2512), HEPH(9843), MT1E(4493), MT1F(4494), MT1H(4496), MT1X(4501), MT2A(4502), SLC11A2(4891), TF(7018), VDR(7421),	0.0366291
	35	Chagas disease (American trypanosomiasis)(hsa05142)	Infectious Diseases/Human Diseases	AKT1(207), AKT3(10000), C3(718), CCL5(6352), CD3D(915), FAS(355), GNAI1(2770), IFNGR1(3459), IL6(3569), JUN(3725), MAP2K4(6416), MAPK13(5603), NFKB1(4790), NFKBIA(4792), PIK3CD(5293), PLCB3(5331), PPP2CA(5515), PPP2R1A(5518), RELA(5970), SMAD2(4087), TGFBR2(7048),	0.037251
	36	RNA polymerase(hsa03020)	Transcription/Genetic Information Processing	POLR2C(5432), POLR2E(5434), POLR2J2(246721), POLR2J3(548644), POLR2J(5439), POLR3E(55718), POLR3G(10622), POLR3K(51728),	0.0417582
	37	Pancreatic cancer(hsa05212)	Cancers/Human Diseases	AKT1(207), AKT3(10000), ARAF(369), CCND1(595), CDKN2A(1029), EGFR(1956), FIGF(2277), NFKB1(4790), PIK3CD(5293), RALA(5898), RELA(5970), SMAD2(4087), STAT3(6774), TGFBR2(7048), VEGFC(7424),	0.0453316
	38	Purine metabolism(hsa00230)	Nucleotide Metabolism/Metabolism	ADCY2(108), ADCY6(112), ADCY7(113), AMPD2(271), ENTPD1(953), ENTPD6(955), GART(2618), GMPR2(51292), GUCY1A3(2982), NME6(10201), NPR2(4882), NT5E(4907), PAPSS2(9060), PDE1A(5136), PDE4B(5142), PDE9A(5152), POLD2(5425), POLD3(10714), POLD4(57804), POLE3(54107), POLR2C(5432), POLR2E(5434), POLR2J2(246721), POLR2J3(548644), POLR2J(5439), POLR3E(55718), POLR3G(10622), POLR3K(51728), PRPS1(5631), PRPS1…	0.0471213
	39	Insulin signaling pathway(hsa04910)	Endocrine System/Organismal Systems	ACACB(32), AKT1(207), AKT3(10000), ARAF(369), EIF4E2(9470), EIF4E(1977), FASN(2194), FBP1(2203), FLOT2(2319), FOXO1(2308), GYS1(2997), IRS2(8660), PIK3CD(5293), PPP1CA(5499), PRKAB1(5564), PRKACB(5567), PRKAG1(5571), PRKAG2(51422), PYGB(5834), RHOQ(23433), SOCS2(8835), SORBS1(10580), SOS1(6654), SOS2(6655), SREBF1(6720), TSC2(7249),	0.0482458

## Sheet: Table S11
	Table S11: Gene ontology enrichment terms from TWIST1 co-regulated genes based on their biological processes and cellular components
	GO ID	Biological process	Level ≥ 3	P-values ≤ 0.001	Gene Hits ≥ 5
	GO:0007155	cell adhesion	3	0	170
	GO:0043062	extracellular structure organization	3	0	45
	GO:0048646	anatomical structure formation involved in morphogenesis	3	0	72
	GO:0044419	interspecies interaction between organisms	3	0	51
	GO:0010648	negative regulation of cell communication	4	0	48
	GO:0044092	negative regulation of molecular function	4	0	60
	GO:0051270	regulation of cellular component movement	4	0	40
	GO:0031589	cell-substrate adhesion	4	0	32
	GO:0001525	angiogenesis	4	0	43
	GO:0030334	regulation of cell migration	4	0	37
	GO:0016477	cell migration	4	0	74
	GO:0030198	extracellular matrix organization	4	0	39
	GO:0016337	cell-cell adhesion	4	0	62
	GO:0042060	wound healing	5	0	46
	GO:0048514	blood vessel morphogenesis	5	0	54
	GO:0009968	negative regulation of signal transduction	5	0	46
	GO:0007156	homophilic cell adhesion	5	0	37
	GO:0007517	muscle organ development	5	0	51
	GO:0043086	negative regulation of catalytic activity	5	0	51
	GO:0030199	collagen fibril organization	5	0	14
	GO:0001944	vasculature development	5	0	71
	GO:0051338	regulation of transferase activity	5	0	65
	GO:0001501	skeletal system development	5	0	73
	GO:0001568	blood vessel development	6	0	69
	GO:0007167	enzyme linked receptor protein signaling pathway	6	0	84
	GO:0016055	Wnt receptor signaling pathway	6	0	43
	GO:0051348	negative regulation of transferase activity	6	0	25
	GO:0043549	regulation of kinase activity	6	0	64
	GO:0045859	regulation of protein kinase activity	7	0	62
	GO:0007178	transmembrane receptor protein serine kinase signaling pathway	7	0	34
	GO:0033673	negative regulation of kinase activity	7	0	25
	GO:0042325	regulation of phosphorylation	7	0	78
	GO:0006469	negative regulation of protein kinase activity	8	0	23
	GO:0040012	regulation of locomotion	3	0.001	39
	GO:0007389	pattern specification process	3	0.001	47
	GO:0000904	cell morphogenesis involved in differentiation	5	0.001	51
	GO:0008361	regulation of cell size	6	0.001	45
	GO:0007169	transmembrane receptor protein tyrosine kinase signaling pathway	7	0.001	48
	GO:0007179	transforming growth factor beta receptor signaling pathway	8	0.001	24
	GO:0007507	heart development	5	2e-06	41
	GO:0071310	cellular response to organic substance	5	2e-06	37
	GO:0006916	anti-apoptosis	6	2e-06	41
	GO:0030111	regulation of Wnt receptor signaling pathway	6	2e-06	16
	GO:0016049	cell growth	3	3e-06	41
	GO:0048193	Golgi vesicle transport	4	3e-06	27
	GO:0045597	positive regulation of cell differentiation	4	3e-06	44
	GO:0000188	inactivation of MAPK activity	8	3e-06	9
	GO:0060485	mesenchyme development	5	7e-06	17
	GO:0007160	cell-matrix adhesion	5	9e-06	24
	GO ID	Cellular components	Level ≥ 3	P-values ≤ 0.001	Gene Hits ≥ 5
	GO:0031012	extracellular matrix	3	0	87
	GO:0005578	proteinaceous extracellular matrix	4	0	83
	GO:0044420	extracellular matrix part	3	0	36
	GO:0005581	collagen	4	0	16
	GO:0031091	platelet alpha granule	7	0	18
	GO:0031983	vesicle lumen	4	1e-06	15
	GO:0044431	Golgi apparatus part	4	1e-06	51
	GO:0022626	cytosolic ribosome	5	1e-06	20
	GO:0005773	vacuole	5	1e-06	46
	GO:0005583	fibrillar collagen	5	1e-06	8
	GO:0048770	pigment granule	6	1e-06	21
	GO:0031093	platelet alpha granule lumen	6	1e-06	14
	GO:0042470	melanosome	7	1e-06	21
	GO:0060205	cytoplasmic membrane-bounded vesicle lumen	5	2e-06	14
	GO:0005604	basement membrane	4	5e-06	20
	GO:0030117	membrane coat	4	7e-06	17
	GO:0048475	coated membrane	4	7e-06	17
	GO:0044433	cytoplasmic vesicle part	4	9e-06	33
	GO:0005764	lysosome	7	1.4e-05	38
	GO:0000323	lytic vacuole	6	1.5e-05	38
	GO:0000139	Golgi membrane	4	3.2e-05	32
	GO:0044445	cytosolic part	5	7.6e-05	28
	GO:0045121	membrane raft	4	9.6e-05	27
	GO:0030120	vesicle coat	5	0.000107	11
	GO:0022625	cytosolic large ribosomal subunit	6	0.000107	11
	GO:0031227	intrinsic to endoplasmic reticulum membrane	5	0.000216	15
	GO:0030055	cell-substrate junction	6	0.000272	19
	GO:0033279	ribosomal subunit	4	0.000323	24
	GO:0030119	AP-type membrane coat adaptor complex	4	0.000325	9
	GO:0031252	cell leading edge	3	0.000334	25
	GO:0070161	anchoring junction	6	0.000341	26
	GO:0005912	adherens junction	7	0.000354	24
	GO:0005924	cell-substrate adherens junction	7	0.000384	18
	GO:0031300	intrinsic to organelle membrane	4	0.000399	25
	GO:0005925	focal adhesion	8	0.000688	17
	GO:0005793	ER-Golgi intermediate compartment	5	0.000753	10

## Sheet: Table S12A & B
	Table S12A & B : TWIST1 co-expressed genes measured on Affymetrix U133A gene-chips in LNN/ER-negative patients
	A: Positively co-expressed genes							B: Negatively co-expressed genes
	TWIST1 probe	Gene-probe on array	Gene name	Rs	FDR* < 5%			TWIST1 probe	Gene-probe on array	Gene name	Rs	FDR* < 5%
	213943_at	37408_at	MRC2	0.630764	8.31001e-09			213943_at	202525_at	PRSS8	-0.511214	5.19164e-07
	213943_at	202237_at	NNMT	0.622141	8.31001e-09			213943_at	208932_at	PPP4C	-0.50155	8.87701e-07
	213943_at	206580_s_at	EFEMP2	0.613308	8.31001e-09			213943_at	221664_s_at	F11R	-0.487311	2.24818e-06
	213943_at	202202_s_at	LAMA4	0.603769	8.31001e-09			213943_at	201966_at	NDUFS2	-0.483012	3.01934e-06
	213943_at	201261_x_at	BGN	0.589867	8.31001e-09			213943_at	200644_at	MARCKSL1	-0.467551	6.97059e-06
	213943_at	205880_at	PRKD1	0.567556	1.91095e-08			213943_at	217893_s_at	AKIRIN1	-0.465549	7.88242e-06
	213943_at	211651_s_at	LAMB1	0.563361	2.25407e-08			213943_at	217829_s_at	USP39	-0.457855	1.1548e-05
	213943_at	204682_at	LTBP2	0.55846	2.62975e-08			213943_at	217797_at	UFC1	-0.452915	1.51474e-05
	213943_at	201438_at	COL6A3	0.55845	2.62975e-08			213943_at	209529_at	PPAP2C	-0.452399	1.56223e-05
	213943_at	201069_at	MMP2	0.548635	5.65922e-08			213943_at	210859_x_at	CLN3	-0.452147	1.56754e-05
	213943_at	213891_s_at	TCF4	0.54704	5.94802e-08			213943_at	205963_s_at	DNAJA3	-0.449185	1.8834e-05
	213943_at	205802_at	TRPC1	0.538814	1.15709e-07			213943_at	209916_at	DHTKD1	-0.445979	2.20711e-05
	213943_at	221729_at	COL5A2	0.537787	1.17327e-07			213943_at	201499_s_at	USP7	-0.445445	2.24221e-05
	213943_at	202192_s_at	GAS7	0.530897	2.03618e-07			213943_at	200666_s_at	DNAJB1	-0.443854	2.40434e-05
	213943_at	215076_s_at	COL3A1	0.526963	2.69988e-07			213943_at	200065_s_at	ARF1	-0.440436	2.78349e-05
	213943_at	65718_at	GPR124	0.521869	3.69918e-07			213943_at	218186_at	RAB25	-0.438388	3.10075e-05
	213943_at	204955_at	SRPX	0.52145	3.69918e-07			213943_at	210243_s_at	B4GALT3	-0.435076	3.6559e-05
	213943_at	212488_at	COL5A1	0.521352	3.69918e-07			213943_at	200052_s_at	ILF2	-0.427109	5.6079e-05
	213943_at	203851_at	IGFBP6	0.519366	4.17438e-07			213943_at	218500_at	C8orf55	-0.426316	5.72052e-05
	213943_at	206857_s_at	FKBP1B	0.517176	4.55823e-07			213943_at	212540_at	CDC34	-0.417893	9.12856e-05
	213943_at	201185_at	HTRA1	0.516202	4.55823e-07			213943_at	208644_at	PARP1	-0.417445	9.37694e-05
	213943_at	201540_at	FHL1	0.515367	4.55823e-07			213943_at	202645_s_at	MEN1	-0.416274	9.98414e-05
	213943_at	221731_x_at	VCAN	0.515077	4.55823e-07			213943_at	201583_s_at	SEC23B	-0.413074	0.000116562
	213943_at	217764_s_at	RAB31	0.51489	4.55823e-07			213943_at	200652_at	SSR2	-0.407433	0.000155382
	213943_at	205499_at	SRPX2	0.514406	4.55823e-07			213943_at	212151_at	PBX1	-0.403921	0.000187062
	213943_at	210794_s_at	MEG3	0.514398	4.55823e-07			213943_at	208684_at	COPA	-0.402718	0.000198635
	213943_at	218974_at	SOBP	0.514323	4.55823e-07			213943_at	201428_at	CLDN4	-0.402373	0.000199307
	213943_at	209348_s_at	MAF	0.513217	4.84625e-07			213943_at	204087_s_at	SLC5A6	-0.401797	0.000204398
	213943_at	211709_s_at	CLEC11A	0.51214	5.04912e-07			213943_at	212961_x_at	CXorf40B	-0.399442	0.000228716
	213943_at	213428_s_at	COL6A1	0.511856	5.04912e-07			213943_at	209509_s_at	DPAGT1	-0.398021	0.000240301
	213943_at	204589_at	NUAK1	0.509087	6.01555e-07			213943_at	210827_s_at	ELF3	-0.397573	0.000243598
	213943_at	214696_at	C17orf91	0.50837	6.1839e-07			213943_at	201378_s_at	UBAP2L	-0.396717	0.00025164
	213943_at	202766_s_at	FBN1	0.505007	7.98206e-07			213943_at	210239_at	IRX5	-0.396415	0.000255074
	213943_at	202450_s_at	CTSK	0.504256	8.26493e-07			213943_at	212211_at	ANKRD17	-0.39616	0.00025803
	213943_at	219773_at	NOX4	0.503808	8.32754e-07			213943_at	209864_at	FRAT2	-0.395235	0.000266716
	213943_at	203186_s_at	S100A4	0.502866	8.75636e-07			213943_at	220607_x_at	TH1L	-0.395121	0.000267358
	213943_at	219778_at	ZFPM2	0.501996	8.87701e-07			213943_at	208938_at	PRCC	-0.394006	0.000279934
	213943_at	202952_s_at	ADAM12	0.501594	8.87701e-07			213943_at	213175_s_at	SNRPB	-0.392971	0.000292335
	213943_at	201667_at	GJA1	0.501477	8.87701e-07			213943_at	217729_s_at	AES	-0.392177	0.000303465
	213943_at	221898_at	PDPN	0.497113	1.24224e-06			213943_at	212218_s_at	FASN	-0.392132	0.000303465
	213943_at	204140_at	TPST1	0.495689	1.36258e-06			213943_at	218474_s_at	KCTD5	-0.389385	0.000348873
	213943_at	202664_at	WIPF1	0.493137	1.63762e-06			213943_at	201118_at	PGD	-0.389314	0.000348873
	213943_at	219700_at	PLXDC1	0.492097	1.73914e-06			213943_at	201544_x_at	PABPN1	-0.384155	0.000441491
	213943_at	208782_at	FSTL1	0.490513	1.93229e-06			213943_at	213787_s_at	EBP	-0.383355	0.00046044
	213943_at	213241_at	PLXNC1	0.490074	1.96056e-06			213943_at	201376_s_at	HNRNPF	-0.383084	0.00046044
	213943_at	212792_at	DPY19L1	0.489415	2.02272e-06			213943_at	200895_s_at	FKBP4	-0.382217	0.000479488
	213943_at	209651_at	TGFB1I1	0.488736	2.09092e-06			213943_at	208901_s_at	TOP1	-0.381472	0.000489426
	213943_at	212758_s_at	ZEB1	0.487303	2.24818e-06			213943_at	204765_at	ARHGEF5	-0.380708	0.000509571
	213943_at	204759_at	RCBTB2	0.486026	2.44769e-06			213943_at	212165_at	TMEM183A / TMEM183B	-0.379299	0.000543839
	213943_at	213644_at	CCDC46	0.482837	3.01934e-06			213943_at	219649_at	ALG6	-0.373598	0.000701267
	213943_at	212848_s_at	C9orf3	0.482177	3.09935e-06			213943_at	217736_s_at	EIF2AK1	-0.372911	0.000714498
	213943_at	44702_at	SYDE1	0.482055	3.09935e-06			213943_at	218302_at	PSENEN	-0.371407	0.000766806
	213943_at	221558_s_at	LEF1	0.481188	3.24797e-06			213943_at	205321_at	EIF2S3	-0.370728	0.000779304
	213943_at	203505_at	ABCA1	0.480778	3.30079e-06			213943_at	202546_at	VAMP8	-0.367942	0.000875552
	213943_at	202391_at	BASP1	0.478624	3.83319e-06			213943_at	210719_s_at	HMG20B	-0.367433	0.000895038
	213943_at	209550_at	NDN	0.477997	3.8972e-06			213943_at	222212_s_at	LASS2	-0.367072	0.0009025
	213943_at	209210_s_at	FERMT2	0.477963	3.8972e-06			213943_at	205512_s_at	AIFM1	-0.367084	0.0009025
	213943_at	202403_s_at	COL1A2	0.477263	4.0549e-06			213943_at	201706_s_at	PEX19	-0.36563	0.000958997
	213943_at	204036_at	LPAR1	0.476972	4.07403e-06			213943_at	200852_x_at	GNB2	-0.36513	0.000977613
	213943_at	201655_s_at	HSPG2	0.476296	4.22404e-06			213943_at	208270_s_at	RNPEP	-0.363734	0.00103437
	213943_at	203131_at	PDGFRA	0.473532	5.13004e-06			213943_at	204266_s_at	CHKA	-0.363641	0.00103733
	213943_at	210809_s_at	POSTN	0.473116	5.22762e-06			213943_at	213412_at	TJP3	-0.363092	0.00106057
	213943_at	209598_at	PNMA2	0.47215	5.5264e-06			213943_at	206445_s_at	PRMT1	-0.362741	0.00107784
	213943_at	204114_at	NID2	0.471585	5.69264e-06			213943_at	217791_s_at	ALDH18A1	-0.362175	0.00110036
	213943_at	221935_s_at	C3orf64	0.470209	6.21993e-06			213943_at	218866_s_at	POLR3K	-0.362192	0.00110036
	213943_at	216835_s_at	DOK1	0.469536	6.44664e-06			213943_at	205450_at	PHKA1	-0.361954	0.00110294
	213943_at	214454_at	ADAMTS2	0.469281	6.47437e-06			213943_at	218261_at	AP1M2	-0.361989	0.00110294
	213943_at	213316_at	KIAA1462	0.469029	6.51594e-06			213943_at	210125_s_at	BANF1	-0.360158	0.00119104
	213943_at	213001_at	ANGPTL2	0.468286	6.75206e-06			213943_at	218069_at	DCTPP1	-0.359745	0.00120845
	213943_at	215446_s_at	LOX	0.468176	6.75206e-06			213943_at	203954_x_at	CLDN3	-0.359664	0.00120845
	213943_at	204575_s_at	MMP19	0.466447	7.47403e-06			213943_at	210014_x_at	IDH3B	-0.357991	0.00128804
	213943_at	220974_x_at	SFXN3	0.464881	8.17245e-06			213943_at	212300_at	TXLNA	-0.355579	0.00142702
	213943_at	202920_at	ANK2	0.464618	8.22879e-06			213943_at	200948_at	MLF2	-0.354766	0.00146903
	213943_at	204464_s_at	EDNRA	0.464124	8.4152e-06			213943_at	212114_at	LOC552889	-0.351383	0.0017176
	213943_at	201744_s_at	LUM	0.463971	8.4152e-06			213943_at	202790_at	CLDN7	-0.350681	0.00175066
	213943_at	202351_at	ITGAV	0.46303	8.91549e-06			213943_at	212219_at	PSME4	-0.350561	0.00175234
	213943_at	204193_at	CHKB	0.46255	9.11224e-06			213943_at	201349_at	SLC9A3R1	-0.350304	0.00176472
	213943_at	219561_at	COPZ2	0.461553	9.69251e-06			213943_at	217748_at	ADIPOR1	-0.348769	0.00186013
	213943_at	212975_at	DENND3	0.460357	1.04447e-05			213943_at	216032_s_at	ERGIC3	-0.348759	0.00186013
	213943_at	204345_at	COL16A1	0.459889	1.06902e-05			213943_at	210707_x_at	PMS2L11	-0.347708	0.00194362
	213943_at	209596_at	MXRA5	0.459357	1.09732e-05			213943_at	200885_at	RHOC	-0.347482	0.00195421
	213943_at	210105_s_at	FYN	0.459209	1.09732e-05			213943_at	219650_at	ERCC6L	-0.346185	0.00204343
	213943_at	219179_at	DACT1	0.458268	1.1548e-05			213943_at	202793_at	LPCAT3	-0.346139	0.00204343
	213943_at	204115_at	GNG11	0.458088	1.1548e-05			213943_at	221853_s_at	NOMO1 /NOMO2	-0.34488	0.00216147
	213943_at	221541_at	CRISPLD2	0.457913	1.1548e-05			213943_at	200903_s_at	AHCY	-0.344644	0.0021773
	213943_at	202007_at	NID1	0.456839	1.23287e-05			213943_at	1053_at	RFC2	-0.344381	0.00219527
	213943_at	211675_s_at	MDFIC	0.456349	1.26452e-05			213943_at	210046_s_at	IDH2	-0.344196	0.00220149
	213943_at	212813_at	JAM3	0.455875	1.2955e-05			213943_at	212053_at	PDXDC1	-0.343374	0.00226488
	213943_at	212977_at	CXCR7	0.454786	1.37723e-05			213943_at	200075_s_at	GUK1	-0.34192	0.00239838
	213943_at	215116_s_at	DNM1	0.454704	1.37723e-05			213943_at	217978_s_at	UBE2Q1	-0.341221	0.00245685
	213943_at	202465_at	PCOLCE	0.454155	1.41684e-05			213943_at	212090_at	GRINA	-0.339715	0.00260789
	213943_at	213652_at	PCSK5	0.453068	1.51474e-05			213943_at	220235_s_at	C1orf103	-0.339427	0.00263952
	213943_at	205932_s_at	MSX1	0.451837	1.59317e-05			213943_at	201121_s_at	PGRMC1	-0.339111	0.00266759
	213943_at	203044_at	CHSY1	0.451438	1.61831e-05			213943_at	208619_at	DDB1	-0.338576	0.00271845
	213943_at	213800_at	CFH	0.448939	1.8954e-05			213943_at	207628_s_at	WBSCR22	-0.338424	0.00273324
	213943_at	219213_at	JAM2	0.448408	1.94651e-05			213943_at	202290_at	PDAP1	-0.336673	0.00290882
	213943_at	202310_s_at	COL1A1	0.446833	2.1525e-05			213943_at	202187_s_at	PPP2R5A	-0.33662	0.00290882
	213943_at	204570_at	COX7A1	0.446624	2.16118e-05			213943_at	209194_at	CETN2	-0.336615	0.00290882
	213943_at	219506_at	C1orf54	0.44651	2.16118e-05			213943_at	208675_s_at	DDOST	-0.336122	0.00295031
	213943_at	207876_s_at	FLNC	0.446206	2.18909e-05			213943_at	218582_at	38412	-0.335695	0.00299456
	213943_at	219064_at	ITIH5	0.445644	2.23412e-05			213943_at	201435_s_at	EIF4E	-0.334558	0.00313531
	213943_at	210495_x_at	FN1	0.445111	2.27759e-05			213943_at	200913_at	PPM1G	-0.334429	0.00314089
	213943_at	213069_at	HEG1	0.444561	2.34864e-05			213943_at	207722_s_at	BTBD2	-0.332937	0.00332385
	213943_at	206201_s_at	MEOX2	0.444262	2.37352e-05			213943_at	218270_at	MRPL24	-0.332111	0.00341311
	213943_at	204083_s_at	TPM2	0.443933	2.40434e-05			213943_at	203342_at	TIMM17B	-0.331901	0.00343467
	213943_at	213139_at	SNAI2	0.443657	2.40557e-05			213943_at	203557_s_at	PCBD1	-0.331793	0.00343989
	213943_at	219427_at	FAT4	0.443485	2.40557e-05			213943_at	207809_s_at	ATP6AP1	-0.331266	0.00350811
	213943_at	221773_at	ELK3	0.443457	2.40557e-05			213943_at	202085_at	TJP2	-0.330679	0.00359439
	213943_at	202948_at	IL1R1	0.44306	2.45443e-05			213943_at	215905_s_at	SNRNP40	-0.329863	0.00370273
	213943_at	209955_s_at	FAP	0.44286	2.46857e-05			213943_at	221256_s_at	HDHD3	-0.329728	0.00371081
	213943_at	219569_s_at	TMEM22	0.442584	2.49931e-05			213943_at	200950_at	ARPC1A	-0.329696	0.00371081
	213943_at	204663_at	ME3	0.441793	2.61305e-05			213943_at	206491_s_at	NAPA	-0.328097	0.0039344
	213943_at	203688_at	PKD2	0.441362	2.66702e-05			213943_at	202636_at	RNF103	-0.327464	0.00401009
	213943_at	213909_at	LRRC15	0.441183	2.67906e-05			213943_at	204331_s_at	MRPS12	-0.327303	0.00402617
	213943_at	204793_at	GPRASP1	0.440545	2.7806e-05			213943_at	217983_s_at	RNASET2	-0.327235	0.00403198
	213943_at	202998_s_at	LOXL2	0.44012	2.81845e-05			213943_at	215780_s_at	hCG_1644608 / SET	-0.32681	0.00409222
	213943_at	205579_at	HRH1	0.439386	2.94054e-05			213943_at	217942_at	MRPS35	-0.325923	0.00422201
	213943_at	218656_s_at	LHFP	0.438389	3.10075e-05			213943_at	208906_at	BSCL2	-0.325762	0.00423955
	213943_at	219025_at	CD248	0.43698	3.38166e-05			213943_at	201271_s_at	RALY	-0.325601	0.00425697
	213943_at	209285_s_at	C3orf63	0.436813	3.39372e-05			213943_at	218275_at	SLC25A10	-0.325269	0.00431457
	213943_at	207173_x_at	CDH11	0.436715	3.39372e-05			213943_at	209008_x_at	KRT8	-0.325133	0.00432899
	213943_at	201470_at	GSTO1	0.435876	3.56731e-05			213943_at	202915_s_at	FAM20B	-0.324975	0.00434632
	213943_at	208851_s_at	THY1	0.435725	3.57949e-05			213943_at	201113_at	TUFM	-0.324975	0.00434632
	213943_at	209447_at	SYNE1	0.43508	3.6559e-05			213943_at	217007_s_at	ADAM15	-0.324821	0.00437052
	213943_at	201162_at	IGFBP7	0.43507	3.6559e-05			213943_at	217777_s_at	PTPLAD1	-0.324556	0.00440986
	213943_at	60471_at	RIN3	0.434963	3.6559e-05			213943_at	200001_at	CAPNS1	-0.323901	0.00451616
	213943_at	201506_at	TGFBI	0.434435	3.762e-05			213943_at	201079_at	SYNGR2	-0.323766	0.00452946
	213943_at	209656_s_at	TMEM47	0.433974	3.84736e-05			213943_at	218188_s_at	TIMM13	-0.323305	0.00461999
	213943_at	201431_s_at	DPYSL3	0.433893	3.84736e-05			213943_at	214667_s_at	TP53I11	-0.32317	0.00464125
	213943_at	212423_at	ZCCHC24	0.433396	3.94999e-05			213943_at	200695_at	PPP2R1A	-0.322921	0.00468555
	213943_at	222101_s_at	DCHS1	0.433284	3.95173e-05			213943_at	213272_s_at	TMEM159	-0.322866	0.00468555
	213943_at	201153_s_at	MBNL1	0.433158	3.96051e-05			213943_at	220486_x_at	TMEM164	-0.321599	0.00490168
	213943_at	209721_s_at	IFFO1	0.432842	4.01826e-05			213943_at	218112_at	MRPS34	-0.32108	0.00500411
	213943_at	203083_at	THBS2	0.430172	4.7649e-05			213943_at	201015_s_at	JUP	-0.320983	0.00501848
	213943_at	221840_at	PTPRE	0.429147	5.06573e-05			213943_at	201264_at	COPE	-0.32077	0.00505966
	213943_at	212354_at	SULF1	0.428811	5.12289e-05			213943_at	218083_at	PTGES2	-0.320515	0.00509444
	213943_at	221832_s_at	LUZP1	0.428784	5.12289e-05			213943_at	209681_at	SLC19A2	-0.320293	0.00513861
	213943_at	209732_at	CLEC2B	0.428231	5.27307e-05			213943_at	208680_at	PRDX1	-0.320148	0.00514826
	213943_at	209263_x_at	TSPAN4	0.427229	5.59665e-05			213943_at	218035_s_at	RBM47	-0.319864	0.00518537
	213943_at	212097_at	CAV1	0.426767	5.63845e-05			213943_at	219125_s_at	RAG1AP1	-0.31977	0.00519649
	213943_at	204359_at	FLRT2	0.426642	5.63845e-05			213943_at	206949_s_at	RUSC1	-0.319547	0.00523324
	213943_at	202114_at	SNX2	0.426639	5.63845e-05			213943_at	203109_at	UBE2M	-0.3192	0.00530058
	213943_at	213543_at	SGCD	0.426637	5.63845e-05			213943_at	208132_x_at	BAT2	-0.318833	0.00536502
	213943_at	218935_at	EHD3	0.42579	5.88548e-05			213943_at	201004_at	SSR4	-0.318593	0.00539866
	213943_at	201865_x_at	NR3C1	0.425512	5.95221e-05			213943_at	202454_s_at	ERBB3	-0.317324	0.00563864
	213943_at	220272_at	BNC2	0.424829	6.19027e-05			213943_at	212539_at	CHD1L	-0.316755	0.00574729
	213943_at	202363_at	SPOCK1	0.423839	6.52685e-05			213943_at	201874_at	MPZL1	-0.31671	0.00574729
	213943_at	205479_s_at	PLAU	0.423445	6.67673e-05			213943_at	202743_at	PIK3R3	-0.31635	0.00577404
	213943_at	218899_s_at	BAALC	0.423259	6.6996e-05			213943_at	202218_s_at	FADS2	-0.316046	0.00583166
	213943_at	219779_at	ZFHX4	0.422318	7.09566e-05			213943_at	214088_s_at	FUT3	-0.315031	0.00602209
	213943_at	214247_s_at	DKK3	0.421253	7.54893e-05			213943_at	200916_at	TAGLN2	-0.31473	0.00608147
	213943_at	203886_s_at	FBLN2	0.420498	7.87387e-05			213943_at	218001_at	MRPS2	-0.31459	0.00611093
	213943_at	204396_s_at	GRK5	0.419805	8.19503e-05			213943_at	218928_s_at	SLC37A1	-0.313816	0.00625666
	213943_at	205407_at	RECK	0.419556	8.26927e-05			213943_at	91816_f_at	MEX3D	-0.313454	0.00631932
	213943_at	201380_at	CRTAP	0.417058	9.56273e-05			213943_at	201839_s_at	EPCAM	-0.313366	0.00633204
	213943_at	201860_s_at	PLAT	0.416174	9.98714e-05			213943_at	212568_s_at	DLAT	-0.313344	0.00633204
	213943_at	209496_at	RARRES2	0.41601	0.000100489			213943_at	209238_at	STX3	-0.313279	0.00634141
	213943_at	201792_at	AEBP1	0.415674	0.000101684			213943_at	218229_s_at	POGK	-0.313225	0.00634677
	213943_at	205226_at	PDGFRL	0.415544	0.000102284			213943_at	213330_s_at	STIP1	-0.31241	0.00647863
	213943_at	200665_s_at	SPARC	0.415246	0.000103456			213943_at	211168_s_at	UPF1	-0.312387	0.00647863
	213943_at	206101_at	ECM2	0.414363	0.000108639			213943_at	202005_at	ST14	-0.311681	0.0066255
	213943_at	202458_at	PRSS23	0.413462	0.000114337			213943_at	212281_s_at	TMEM97	-0.311207	0.00672396
	213943_at	207000_s_at	PPP3CC	0.412503	0.00012046			213943_at	203155_at	SETDB1	-0.310335	0.00690289
	213943_at	213262_at	SACS	0.411338	0.00012869			213943_at	221520_s_at	CDCA8	-0.310094	0.00695812
	213943_at	203865_s_at	ADARB1	0.411277	0.00012869			213943_at	203287_at	LAD1	-0.309884	0.00700253
	213943_at	203603_s_at	ZEB2	0.411134	0.000129122			213943_at	217948_at	FAM127B	-0.309846	0.00700253
	213943_at	201389_at	ITGA5	0.409813	0.000137347			213943_at	219617_at	C2orf34	-0.3093	0.00712894
	213943_at	208131_s_at	PTGIS	0.40977	0.000137347			213943_at	221222_s_at	C1orf56	-0.309124	0.00716173
	213943_at	200743_s_at	TPP1	0.409767	0.000137347			213943_at	211934_x_at	GANAB	-0.309104	0.00716173
	213943_at	203889_at	SCG5	0.409758	0.000137347			213943_at	214484_s_at	SIGMAR1	-0.308863	0.0072187
	213943_at	202878_s_at	CD93	0.408452	0.000148025			213943_at	202593_s_at	GDE1	-0.308608	0.00728073
	213943_at	208789_at	PTRF	0.407965	0.000152121			213943_at	202261_at	VPS72	-0.30842	0.00730199
	213943_at	204035_at	SCG2	0.407832	0.000152418			213943_at	208973_at	ERI3	-0.307669	0.00749741
	213943_at	209869_at	ADRA2A	0.406117	0.000167348			213943_at	217815_at	SUPT16H	-0.307437	0.00754418
	213943_at	201921_at	GNG10	0.405231	0.000176021			213943_at	201932_at	LRRC41	-0.307127	0.00763732
	213943_at	214434_at	HSPA12A	0.40497	0.000177771			213943_at	201188_s_at	ITPR3	-0.306576	0.00778295
	213943_at	202273_at	PDGFRB	0.404241	0.00018526			213943_at	200078_s_at	ATP6V0B	-0.30653	0.0077882
	213943_at	213273_at	ODZ4	0.403955	0.000187062			213943_at	218506_x_at	GLYR1	-0.306411	0.00780466
	213943_at	35156_at	R3HCC1	0.402893	0.000198005			213943_at	209234_at	KIF1B	-0.306363	0.00780466
	213943_at	200911_s_at	TACC1	0.402658	0.000198635			213943_at	221526_x_at	PARD3	-0.306244	0.0078147
	213943_at	207808_s_at	PROS1	0.402452	0.000199307			213943_at	207877_s_at	NVL	-0.305911	0.00789211
	213943_at	221221_s_at	KLHL3	0.402391	0.000199307			213943_at	212175_s_at	AK2	-0.305512	0.00798578
	213943_at	208747_s_at	C1S	0.402115	0.000201364			213943_at	220240_s_at	TMCO3	-0.305238	0.00806061
	213943_at	202283_at	SERPINF1	0.400842	0.000215342			213943_at	208308_s_at	GPI	-0.304383	0.00828769
	213943_at	212158_at	SDC2	0.400574	0.000217788			213943_at	219121_s_at	ESRP1	-0.304064	0.00833306
	213943_at	211959_at	IGFBP5	0.399855	0.000225964			213943_at	200846_s_at	PPP1CA	-0.303622	0.00842125
	213943_at	218651_s_at	LARP6	0.399784	0.000225964			213943_at	207163_s_at	AKT1	-0.303619	0.00842125
	213943_at	203305_at	F13A1	0.399726	0.000225964			213943_at	201771_at	SCAMP3	-0.303548	0.00843647
	213943_at	204135_at	FILIP1L	0.399392	0.000228716			213943_at	209104_s_at	NHP2	-0.302858	0.00861362
	213943_at	203498_at	RCAN2	0.399197	0.000229984			213943_at	206385_s_at	ANK3	-0.302838	0.00861362
	213943_at	204163_at	EMILIN1	0.399128	0.000229984			213943_at	220865_s_at	PDSS1	-0.302391	0.00871968
	213943_at	204646_at	DPYD	0.399005	0.000230847			213943_at	202356_s_at	GTF2F1	-0.302361	0.00871968
	213943_at	200785_s_at	LRP1	0.398677	0.000234071			213943_at	209279_s_at	NSDHL	-0.302355	0.00871968
	213943_at	203232_s_at	ATXN1	0.39851	0.00023538			213943_at	202846_s_at	PIGC	-0.302019	0.00882517
	213943_at	201508_at	IGFBP4	0.398339	0.000236678			213943_at	202945_at	FPGS	-0.301991	0.00882517
	213943_at	210139_s_at	PMP22	0.397624	0.000243598			213943_at	201173_x_at	NUDC	-0.301816	0.00888111
	213943_at	212982_at	ZDHHC17	0.397565	0.000243598			213943_at	208336_s_at	TECR	-0.30131	0.0090216
	213943_at	209007_s_at	C1orf63	0.397337	0.00024575			213943_at	200752_s_at	CAPN1	-0.301175	0.0090616
	213943_at	40446_at	PHF1	0.397256	0.000246053			213943_at	65133_i_at	INO80B	-0.300915	0.00911647
	213943_at	221127_s_at	DKK3	0.396855	0.000250908			213943_at	212088_at	PMPCA	-0.300543	0.00923399
	213943_at	201105_at	LGALS1	0.395437	0.000266069			213943_at	216392_s_at	SEC23IP	-0.300482	0.00924713
	213943_at	215388_s_at	CFH /CFHR1	0.395373	0.000266069			213943_at	201388_at	PSMD3	-0.300362	0.00927229
	213943_at	203835_at	LRRC32	0.39536	0.000266069			213943_at	218262_at	RMND5B	-0.30033	0.00927229
	213943_at	203063_at	PPM1F	0.39535	0.000266069			213943_at	203228_at	PAFAH1B3	-0.300307	0.00927229
	213943_at	205666_at	FMO1	0.394848	0.000270613			213943_at	208677_s_at	BSG	-0.30012	0.00933571
	213943_at	203981_s_at	ABCD4	0.394606	0.000273407			213943_at	219850_s_at	EHF	-0.299175	0.00963993
	213943_at	214043_at	PTPRD	0.394358	0.000276178			213943_at	207017_at	RAB27B	-0.298891	0.00973404
	213943_at	213737_x_at	GOLGA8C /GOLGA8D	0.394064	0.000279788			213943_at	205107_s_at	EFNA4	-0.298617	0.00982524
	213943_at	209894_at	LEPR	0.393869	0.000280934			213943_at	218531_at	TMEM134	-0.298318	0.00991622
	213943_at	210273_at	PCDH7	0.393733	0.000281214			213943_at	219217_at	NARS2	-0.298285	0.00991841
	213943_at	205022_s_at	FOXN3	0.393722	0.000281214			213943_at	218120_s_at	HMOX2	-0.298205	0.00994076
	213943_at	203700_s_at	DIO2	0.392372	0.000301685			213943_at	200064_at	HSP90AB1	-0.298079	0.00998224
	213943_at	217982_s_at	MORF4L1	0.391684	0.000310581			213943_at	222075_s_at	OAZ3	-0.297944	0.0100166
	213943_at	209081_s_at	COL18A1	0.391345	0.000315156			213943_at	214828_s_at	RRP7A /RRP7B	-0.29758	0.0101368
	213943_at	217650_x_at	ST3GAL2	0.391279	0.000315157			213943_at	203967_at	CDC6	-0.297206	0.0102631
	213943_at	204472_at	GEM	0.390924	0.000320501			213943_at	200825_s_at	HYOU1	-0.29717	0.010267
	213943_at	203562_at	FEZ1	0.389263	0.000348873			213943_at	219929_s_at	ZFYVE21	-0.296838	0.0104
	213943_at	204078_at	SC65	0.389035	0.000352387			213943_at	203359_s_at	MYCBP	-0.296796	0.0104067
	213943_at	201215_at	PLS3	0.388828	0.000355067			213943_at	210010_s_at	SLC25A1	-0.295668	0.0107896
	213943_at	207233_s_at	MITF	0.388257	0.000365756			213943_at	202471_s_at	IDH3G	-0.295574	0.0107956
	213943_at	218718_at	PDGFC	0.388017	0.000369165			213943_at	200011_s_at	ARF3	-0.29548	0.0108259
	213943_at	205828_at	MMP3	0.387218	0.000385298			213943_at	204348_s_at	AK3L1	-0.295285	0.0108855
	213943_at	219358_s_at	ADAP2	0.387066	0.00038702			213943_at	209027_s_at	ABI1	-0.294922	0.0109833
	213943_at	207988_s_at	ARPC2	0.386599	0.000395451			213943_at	203431_s_at	RICS	-0.294922	0.0109833
	213943_at	218588_s_at	FAM114A2	0.386371	0.00039791			213943_at	217780_at	C19orf56	-0.294219	0.0112487
	213943_at	218820_at	C14orf132	0.386055	0.000404275			213943_at	201460_at	MAPKAPK2	-0.293939	0.011369
	213943_at	221447_s_at	GLT8D2	0.386016	0.000406683			213943_at	218460_at	HEATR2	-0.29379	0.0113961
	213943_at	212992_at	AHNAK2	0.385274	0.00042076			213943_at	218214_at	C12orf44	-0.293768	0.0113961
	213943_at	218456_at	CAPRIN2	0.384629	0.000434734			213943_at	209873_s_at	PKP3	-0.29376	0.0113961
	213943_at	203151_at	MAP1A	0.384241	0.000441491			213943_at	218064_s_at	AKAP8L	-0.29294	0.0116968
	213943_at	201666_at	TIMP1	0.384142	0.000441491			213943_at	203274_at	F8A1 / F8A2	-0.292513	0.0118803
	213943_at	209765_at	ADAM19	0.383816	0.000447536			213943_at	215711_s_at	WEE1	-0.292192	0.0120136
	213943_at	218854_at	DSE	0.383055	0.00046044			213943_at	211202_s_at	KDM5B	-0.291872	0.0121364
	213943_at	205648_at	WNT2	0.382991	0.00046044			213943_at	208928_at	POR	-0.291869	0.0121364
	213943_at	37005_at	NBL1	0.382984	0.00046044			213943_at	204247_s_at	CDK5	-0.291837	0.0121393
	213943_at	221748_s_at	TNS1	0.382946	0.00046044			213943_at	204238_s_at	C6orf108	-0.291734	0.0121718
	213943_at	201944_at	HEXB	0.382894	0.000462538			213943_at	201005_at	CD9	-0.291578	0.0122068
	213943_at	203435_s_at	MME	0.381961	0.000481504			213943_at	211297_s_at	CDK7	-0.291366	0.012272
	213943_at	219563_at	C14orf139	0.381905	0.000481814			213943_at	200594_x_at	HNRNPU	-0.290801	0.012535
	213943_at	201426_s_at	VIM	0.381865	0.000481814			213943_at	212541_at	FLAD1	-0.290556	0.0126492
	213943_at	218418_s_at	KANK2	0.381537	0.000489426			213943_at	217854_s_at	POLR2E	-0.289986	0.0128917
	213943_at	210517_s_at	AKAP12	0.380025	0.00052595			213943_at	219630_at	PDZK1IP1	-0.289966	0.0128917
	213943_at	219249_s_at	FKBP10	0.37986	0.000529552			213943_at	209343_at	EFHD1	-0.289815	0.0129587
	213943_at	213541_s_at	ERG	0.379859	0.000529552			213943_at	217930_s_at	TOLLIP	-0.289358	0.0131765
	213943_at	212067_s_at	C1R	0.379328	0.000542105			213943_at	202223_at	STT3A	-0.288541	0.0134964
	213943_at	218950_at	ARAP3	0.379073	0.000545562			213943_at	201726_at	ELAVL1	-0.288463	0.0135254
	213943_at	204482_at	CLDN5	0.378631	0.000557933			213943_at	201524_x_at	UBE2N	-0.288222	0.0135882
	213943_at	220327_at	VGLL3	0.378502	0.000559597			213943_at	36994_at	ATP6V0C	-0.288018	0.0136875
	213943_at	202820_at	AHR	0.376932	0.000610667			213943_at	218361_at	GOLPH3L	-0.287918	0.0137149
	213943_at	204337_at	RGS4	0.376577	0.000619179			213943_at	220744_s_at	IFT122	-0.287655	0.0137624
	213943_at	208636_at	ACTN1	0.376245	0.00063114			213943_at	217860_at	LOC732160 /NDUFA10	-0.287345	0.0139094
	213943_at	211980_at	COL4A1	0.375793	0.000638038			213943_at	201216_at	ERP29	-0.286887	0.0140839
	213943_at	205117_at	FGF1	0.375746	0.000638038			213943_at	202889_x_at	MAP7	-0.286116	0.0144072
	213943_at	49452_at	ACACB	0.375697	0.000638038			213943_at	209163_at	CYB561	-0.285903	0.0144801
	213943_at	200762_at	DPYSL2	0.375697	0.000638038			213943_at	203120_at	TP53BP2	-0.285684	0.014595
	213943_at	220076_at	ANKH	0.375689	0.000638038			213943_at	220189_s_at	MGAT4B	-0.28531	0.0147132
	213943_at	205383_s_at	ZBTB20	0.375419	0.000646265			213943_at	215158_s_at	DEDD	-0.285081	0.0148352
	213943_at	201798_s_at	MYOF	0.375107	0.000654439			213943_at	220642_x_at	GPR89A / GPR89B /GPR89C	-0.2848	0.0149656
	213943_at	218146_at	GLT8D1	0.375039	0.00065573			213943_at	203832_at	SNRPF	-0.284194	0.0152696
	213943_at	203570_at	LOXL1	0.374546	0.000670629			213943_at	212437_at	CENPB	-0.284123	0.0152957
	213943_at	204689_at	HHEX	0.373794	0.000699005			213943_at	220797_at	METT10D	-0.284102	0.0152957
	213943_at	202679_at	NPC1	0.373614	0.000701267			213943_at	217765_at	NRBP1	-0.283956	0.0153706
	213943_at	206682_at	CLEC10A	0.373524	0.000702387			213943_at	201650_at	KRT19	-0.283801	0.0154521
	213943_at	212887_at	SEC23A	0.373428	0.0007035			213943_at	221712_s_at	WDR74	-0.283653	0.0154909
	213943_at	204457_s_at	GAS1	0.373198	0.000707945			213943_at	204942_s_at	ALDH3B2	-0.283566	0.0155059
	213943_at	203336_s_at	ITGB1BP1	0.373133	0.000709034			213943_at	219420_s_at	C1orf163	-0.283456	0.0155285
	213943_at	213010_at	PRKCDBP	0.373007	0.000713434			213943_at	213392_at	IQCK	-0.283153	0.0156573
	213943_at	206377_at	FOXF2	0.372722	0.000718853			213943_at	217466_x_at	RPS2	-0.28294	0.0157607
	213943_at	214054_at	DOK2	0.372278	0.000733043			213943_at	218440_at	MCCC1	-0.282815	0.0158247
	213943_at	212414_s_at	GLYR1 / SEPT6	0.371222	0.000774225			213943_at	202189_x_at	PTBP1	-0.282708	0.0158501
	213943_at	200839_s_at	CTSB	0.370953	0.000779304			213943_at	200691_s_at	HSPA9	-0.282672	0.0158501
	213943_at	207031_at	NKX3-2	0.370923	0.000779304			213943_at	210983_s_at	MCM7	-0.282669	0.0158501
	213943_at	202149_at	NEDD9	0.370813	0.000779304			213943_at	201729_s_at	KIAA0100	-0.282569	0.0158647
	213943_at	208970_s_at	UROD	0.370805	0.000779304			213943_at	221038_at	---	-0.281932	0.0161999
	213943_at	208443_x_at	SHOX2	0.370782	0.000779304			213943_at	202826_at	SPINT1	-0.281914	0.0161999
	213943_at	214438_at	HLX	0.370693	0.000780133			213943_at	202326_at	EHMT2	-0.281489	0.0163828
	213943_at	204944_at	PTPRG	0.370298	0.000793706			213943_at	200918_s_at	SRPR	-0.28145	0.0163924
	213943_at	211445_x_at	NACAP1	0.36998	0.00080402			213943_at	210653_s_at	BCKDHB	-0.281266	0.0164819
	213943_at	213451_x_at	TNXA / TNXB	0.369793	0.00081084			213943_at	202642_s_at	TRRAP	-0.280992	0.0166289
	213943_at	218224_at	PNMA1	0.369693	0.00081084			213943_at	200896_x_at	HDGF	-0.280963	0.0166289
	213943_at	202701_at	BMP1	0.369634	0.00081084			213943_at	205780_at	BIK	-0.280606	0.0167926
	213943_at	202620_s_at	PLOD2	0.369606	0.00081084			213943_at	217742_s_at	WAC	-0.280368	0.0169043
	213943_at	203485_at	RTN1	0.3696	0.00081084			213943_at	209428_s_at	ZFPL1	-0.280224	0.0169689
	213943_at	200897_s_at	PALLD	0.369428	0.000814676			213943_at	207348_s_at	LIG3	-0.280016	0.0170938
	213943_at	50400_at	PAOX	0.369277	0.00081849			213943_at	219326_s_at	B3GNT2	-0.27986	0.017151
	213943_at	221870_at	EHD2	0.368477	0.000853311			213943_at	215792_s_at	DNAJC11	-0.279229	0.0174813
	213943_at	212535_at	MEF2A	0.367448	0.000894578			213943_at	212482_at	RMND5A	-0.279191	0.0174813
	213943_at	204773_at	IL11RA	0.367368	0.000895495			213943_at	206724_at	CBX4	-0.279026	0.0175791
	213943_at	218380_at	LOC728392 / NLRP1	0.36702	0.000902932			213943_at	205169_at	RBBP5	-0.278987	0.0175899
	213943_at	205656_at	PCDH17	0.366346	0.000933675			213943_at	208819_at	RAB8A	-0.27889	0.0176376
	213943_at	205798_at	IL7R	0.366217	0.000937037			213943_at	203713_s_at	LLGL2	-0.278871	0.0176376
	213943_at	220244_at	LOH3CR2A	0.365946	0.00094671			213943_at	202164_s_at	CNOT8	-0.278493	0.0178534
	213943_at	219973_at	ARSJ	0.365918	0.00094671			213943_at	209852_x_at	PSME3	-0.278449	0.0178676
	213943_at	205381_at	LRRC17	0.365292	0.000974203			213943_at	201440_at	DDX23	-0.278361	0.0178868
	213943_at	1598_g_at	GAS6	0.365169	0.000977403			213943_at	208828_at	POLE3	-0.278351	0.0178868
	213943_at	220918_at	C21orf96	0.364848	0.000989675			213943_at	200030_s_at	SLC25A3	-0.277903	0.0181054
	213943_at	203695_s_at	DFNA5	0.364795	0.00098985			213943_at	214173_x_at	C19orf2	-0.277539	0.0183169
	213943_at	207426_s_at	TNFSF4	0.364417	0.0010077			213943_at	212782_x_at	POLR2J	-0.27749	0.018318
	213943_at	205823_at	RGS12	0.36415	0.00101674			213943_at	201698_s_at	SFRS9	-0.277261	0.0184671
	213943_at	213194_at	ROBO1	0.364121	0.00101674			213943_at	220318_at	EPN3	-0.277178	0.0184941
	213943_at	201012_at	ANXA1	0.36346	0.00104609			213943_at	203073_at	COG2	-0.276939	0.0185828
	213943_at	200953_s_at	CCND2	0.363151	0.00106057			213943_at	204866_at	PHF16	-0.276872	0.0185984
	213943_at	217312_s_at	COL7A1	0.362528	0.00108639			213943_at	218062_x_at	CDC42EP4	-0.276281	0.0188871
	213943_at	213220_at	NCRNA00081	0.362108	0.00110036			213943_at	214258_x_at	KAT5	-0.276271	0.0188871
	213943_at	205529_s_at	RUNX1T1	0.36179	0.0011083			213943_at	205093_at	PLEKHA6	-0.276143	0.0189308
	213943_at	210657_s_at	hcdcrel2b	0.361776	0.0011083			213943_at	212339_at	EPB41L1	-0.276066	0.0189713
	213943_at	203939_at	NT5E	0.361696	0.00111081			213943_at	201277_s_at	HNRNPAB	-0.275269	0.0194672
	213943_at	204774_at	EVI2A	0.361616	0.00111081			213943_at	216836_s_at	ERBB2	-0.274795	0.0197787
	213943_at	219134_at	ELTD1	0.360395	0.00118339			213943_at	220248_x_at	NSFL1C	-0.274756	0.0197912
	213943_at	200771_at	LAMC1	0.360212	0.00119104			213943_at	201104_x_at	NBPF10 /NBPF11	-0.274666	0.0198431
	213943_at	205434_s_at	AAK1	0.359677	0.00120845			213943_at	212694_s_at	PCCB	-0.274079	0.0202118
	213943_at	219528_s_at	BCL11B	0.359671	0.00120845			213943_at	221761_at	ADSS	-0.273724	0.0203659
	213943_at	210511_s_at	INHBA	0.359623	0.00120845			213943_at	201131_s_at	CDH1	-0.273579	0.0204091
	213943_at	218002_s_at	CXCL14	0.359364	0.00122174			213943_at	219020_at	HS1BP3	-0.2734	0.0204746
	213943_at	211673_s_at	MOCS1	0.359079	0.00123769			213943_at	209165_at	AATF	-0.273383	0.0204746
	213943_at	206995_x_at	SCARF1	0.358937	0.00124266			213943_at	212789_at	NCAPD3	-0.273237	0.0205586
	213943_at	205522_at	HOXD4	0.358542	0.00126336			213943_at	208978_at	CRIP2	-0.272844	0.0207847
	213943_at	205266_at	LIF	0.358539	0.00126336			213943_at	203198_at	CDK9	-0.272683	0.0208913
	213943_at	206506_s_at	SUPT3H	0.358368	0.00127093			213943_at	219350_s_at	DIABLO	-0.272479	0.0210362
	213943_at	205100_at	GFPT2	0.358246	0.00127577			213943_at	200828_s_at	ZNF207	-0.27246	0.0210362
	213943_at	213422_s_at	MXRA8	0.358004	0.00128804			213943_at	204710_s_at	WIPI2	-0.271893	0.0214471
	213943_at	217713_x_at	DKFZP566N034	0.357836	0.00129547			213943_at	200636_s_at	PTPRF	-0.271857	0.0214577
	213943_at	205055_at	ITGAE	0.357672	0.00130286			213943_at	219023_at	C4orf16	-0.271801	0.0214865
	213943_at	221950_at	EMX2	0.357299	0.00132353			213943_at	218124_at	RETSAT	-0.271664	0.0215621
	213943_at	201591_s_at	NISCH	0.356949	0.00134409			213943_at	221927_s_at	ABHD11	-0.271464	0.0216546
	213943_at	202723_s_at	FOXO1	0.356114	0.00140165			213943_at	204717_s_at	SLC29A2	-0.271261	0.0217501
	213943_at	202732_at	PKIG	0.356031	0.00140341			213943_at	218813_s_at	SH3GLB2	-0.270406	0.0223222
	213943_at	212959_s_at	GNPTAB	0.355884	0.00140955			213943_at	220739_s_at	CNNM3	-0.270316	0.022354
	213943_at	221031_s_at	APOLD1	0.355865	0.00140955			213943_at	218118_s_at	TIMM23	-0.270238	0.0223893
	213943_at	205794_s_at	NOVA1	0.35546	0.00142777			213943_at	215023_s_at	PEX1	-0.270218	0.0223893
	213943_at	206702_at	TEK	0.355444	0.00142777			213943_at	218260_at	DDA1	-0.270009	0.0225124
	213943_at	209905_at	HOXA9	0.355357	0.00143204			213943_at	217900_at	IARS2	-0.269877	0.0226074
	213943_at	218901_at	PLSCR4	0.35516	0.00144409			213943_at	217790_s_at	SSR3	-0.2698	0.0226559
	213943_at	211700_s_at	TRO	0.35323	0.0015869			213943_at	217778_at	SLC39A1	-0.269626	0.0227687
	213943_at	203879_at	PIK3CD	0.353135	0.00159074			213943_at	217929_s_at	KIAA0319L	-0.269457	0.0228582
	213943_at	211990_at	HLA-DPA1	0.352857	0.00161			213943_at	212072_s_at	CSNK2A1	-0.269336	0.0228874
	213943_at	214715_x_at	ZNF160	0.352125	0.00166508			213943_at	211715_s_at	BDH1	-0.269304	0.0228965
	213943_at	219677_at	SPSB1	0.352019	0.00167127			213943_at	202715_at	CAD	-0.269242	0.0229319
	213943_at	213345_at	NFATC4	0.351487	0.00171317			213943_at	200837_at	BCAP31	-0.268674	0.0233562
	213943_at	209946_at	VEGFC	0.35133	0.0017176			213943_at	203617_x_at	ELK1	-0.268446	0.0234816
	213943_at	209687_at	CXCL12	0.351074	0.00173136			213943_at	202427_s_at	BRP44	-0.26801	0.0237374
	213943_at	219432_at	EVC	0.351047	0.00173136			213943_at	209623_at	MCCC2	-0.267862	0.0238373
	213943_at	203167_at	TIMP2	0.351039	0.00173136			213943_at	218367_x_at	USP21	-0.267856	0.0238373
	213943_at	214605_x_at	GPR1	0.350988	0.00173136			213943_at	202658_at	PEX11B	-0.267682	0.0239361
	213943_at	213933_at	PTGER3	0.350859	0.00173978			213943_at	205073_at	CYP2J2	-0.267528	0.0240387
	213943_at	217989_at	HSD17B11	0.350581	0.00175234			213943_at	221428_s_at	TBL1XR1	-0.26733	0.0241989
	213943_at	221634_at	RPL23AP7	0.350529	0.00175317			213943_at	201064_s_at	PABPC4	-0.26702	0.0244258
	213943_at	219142_at	RASL11B	0.350328	0.00176472			213943_at	221856_s_at	FAM63A	-0.266766	0.0246017
	213943_at	202422_s_at	ACSL4	0.349959	0.00179021			213943_at	209421_at	MSH2	-0.26674	0.0246057
	213943_at	219764_at	FZD10	0.349695	0.00181065			213943_at	208649_s_at	VCP	-0.266608	0.0247093
	213943_at	210346_s_at	CLK4	0.349481	0.00182608			213943_at	32209_at	FAM89B	-0.266356	0.0248468
	213943_at	201920_at	SLC20A1	0.349388	0.00183163			213943_at	206074_s_at	HMGA1	-0.265627	0.0254277
	213943_at	213154_s_at	BICD2	0.349261	0.00183716			213943_at	219212_at	HSPA14	-0.265321	0.0256318
	213943_at	201034_at	ADD3	0.349143	0.0018451			213943_at	208620_at	PCBP1	-0.265282	0.0256318
	213943_at	204198_s_at	RUNX3	0.349091	0.00184569			213943_at	218967_s_at	PTER	-0.265267	0.0256318
	213943_at	210762_s_at	DLC1	0.348933	0.00185601			213943_at	209837_at	AP4M1	-0.26525	0.0256318
	213943_at	211005_at	LAT / SPNS1	0.348743	0.00186013			213943_at	211251_x_at	NFYC	-0.264892	0.0258558
	213943_at	209392_at	ENPP2	0.348146	0.00191364			213943_at	201423_s_at	CUL4A	-0.264854	0.0258722
	213943_at	218043_s_at	AZI2	0.348031	0.00192128			213943_at	218170_at	ISOC1	-0.264561	0.0260435
	213943_at	205959_at	MMP13	0.347795	0.00193847			213943_at	203103_s_at	PRPF19	-0.264125	0.0263424
	213943_at	204735_at	PDE4A	0.347656	0.00194399			213943_at	202939_at	ZMPSTE24	-0.264083	0.0263424
	213943_at	212506_at	PICALM	0.347469	0.00195421			213943_at	201222_s_at	RAD23B	-0.264057	0.0263424
	213943_at	206169_x_at	ZC3H7B	0.347421	0.00195454			213943_at	212684_at	ZNF3	-0.263844	0.0264701
	213943_at	211340_s_at	MCAM	0.347331	0.00195724			213943_at	216242_x_at	POLR2J2	-0.26382	0.0264741
	213943_at	209584_x_at	APOBEC3C	0.346995	0.00198823			213943_at	201619_at	PRDX3	-0.263757	0.0264827
	213943_at	217118_s_at	C22orf9	0.346769	0.00200496			213943_at	218016_s_at	POLR3E	-0.263516	0.0265889
	213943_at	221019_s_at	COLEC12	0.346496	0.00202866			213943_at	204088_at	P2RX4	-0.26329	0.0266847
	213943_at	203761_at	SLA	0.346418	0.00203117			213943_at	200713_s_at	MAPRE1	-0.263274	0.0266847
	213943_at	214028_x_at	TDRD3	0.346201	0.00204343			213943_at	212038_s_at	VDAC1	-0.263148	0.0267899
	213943_at	205003_at	DOCK4	0.346128	0.00204343			213943_at	218187_s_at	C8orf33	-0.262013	0.0277968
	213943_at	216264_s_at	LAMB2	0.345732	0.00208063			213943_at	212705_x_at	LOC100293124 / PNPLA2	-0.261508	0.0282473
	213943_at	202052_s_at	RAI14	0.345344	0.00211536			213943_at	210761_s_at	GRB7	-0.261481	0.0282473
	213943_at	209708_at	MOXD1	0.344803	0.00216365			213943_at	202306_at	POLR2G	-0.261477	0.0282473
	213943_at	203936_s_at	MMP9	0.344509	0.0021863			213943_at	212825_at	PAXIP1	-0.261356	0.0283447
	213943_at	203650_at	PROCR	0.344299	0.00219715			213943_at	204676_at	TMEM186	-0.261197	0.0284765
	213943_at	218559_s_at	MAFB	0.344277	0.00219715			213943_at	218237_s_at	SLC38A1	-0.260358	0.0291738
	213943_at	203159_at	GLS	0.344041	0.00221238			213943_at	219043_s_at	LOC285359 / PDCL3	-0.260307	0.029195
	213943_at	204000_at	GNB5	0.344021	0.00221238			213943_at	212727_at	DLG3	-0.260123	0.0293395
	213943_at	215645_at	FLCN	0.343617	0.00225278			213943_at	200965_s_at	ABLIM1	-0.26002	0.0293845
	213943_at	216840_s_at	LAMA2	0.343548	0.00225494			213943_at	214433_s_at	SELENBP1	-0.259917	0.0294516
	213943_at	212012_at	PXDN	0.343374	0.00226488			213943_at	204228_at	PPIH	-0.259796	0.0295616
	213943_at	201125_s_at	ITGB5	0.342777	0.00232797			213943_at	206059_at	ZNF91	-0.259585	0.0297701
	213943_at	213075_at	OLFML2A	0.342368	0.00237059			213943_at	220651_s_at	MCM10	-0.259333	0.0299791
	213943_at	208109_s_at	C15orf5	0.342307	0.00237284			213943_at	209100_at	IFRD2	-0.259224	0.0300334
	213943_at	209780_at	PHTF2	0.34222	0.00237805			213943_at	201520_s_at	GRSF1	-0.259178	0.0300599
	213943_at	219387_at	CCDC88A	0.342141	0.00238231			213943_at	201783_s_at	RELA	-0.258498	0.0306943
	213943_at	204749_at	NAP1L3	0.34206	0.00238682			213943_at	201897_s_at	CKS1B	-0.25843	0.0307145
	213943_at	220071_x_at	HAUS2	0.341442	0.00244903			213943_at	200812_at	CCT7	-0.258291	0.0307552
	213943_at	207016_s_at	ALDH1A2	0.341412	0.00244903			213943_at	214203_s_at	PRODH	-0.258272	0.0307552
	213943_at	207992_s_at	AMPD3	0.34133	0.0024538			213943_at	210652_s_at	TTC39A	-0.258246	0.0307552
	213943_at	205870_at	BDKRB2	0.341225	0.00245685			213943_at	212198_s_at	TM9SF4	-0.258192	0.0307552
	213943_at	213474_at	KCTD7	0.340633	0.0025192			213943_at	211783_s_at	MTA1	-0.258138	0.0307933
	213943_at	216061_x_at	PDGFB	0.340628	0.0025192			213943_at	211780_x_at	DCTN1	-0.258111	0.0308001
	213943_at	219574_at	MARCH1	0.340525	0.00252682			213943_at	200068_s_at	CANX	-0.257824	0.0310942
	213943_at	215515_at	KIRREL	0.340412	0.00253558			213943_at	201791_s_at	DHCR7	-0.257705	0.0311695
	213943_at	202157_s_at	CUGBP2	0.340011	0.00258083			213943_at	203033_x_at	FH	-0.257679	0.031176
	213943_at	205792_at	WISP2	0.33977	0.00260621			213943_at	218608_at	ATP13A2	-0.257654	0.031181
	213943_at	205713_s_at	COMP	0.339366	0.00264199			213943_at	210502_s_at	PPIE	-0.257511	0.0312795
	213943_at	213725_x_at	XYLT1	0.339086	0.00266759			213943_at	212247_at	NUP205	-0.25744	0.0313109
	213943_at	210044_s_at	LYL1	0.339038	0.0026685			213943_at	210371_s_at	RBBP4	-0.257385	0.0313513
	213943_at	203980_at	FABP4	0.33896	0.00267336			213943_at	200910_at	CCT3	-0.256802	0.0318477
	213943_at	204894_s_at	AOC3	0.338083	0.00277297			213943_at	202699_s_at	TMEM63A	-0.256757	0.031869
	213943_at	218285_s_at	BDH2	0.338031	0.00277297			213943_at	213050_at	COBL	-0.256647	0.0319732
	213943_at	209099_x_at	JAG1	0.338005	0.00277297			213943_at	214527_s_at	PQBP1	-0.25657	0.0320044
	213943_at	220340_at	KIAA1772	0.337951	0.00277479			213943_at	38766_at	SRCAP	-0.256404	0.0320677
	213943_at	220079_s_at	USP48	0.337287	0.00286037			213943_at	218493_at	SNRNP25	-0.255651	0.0327354
	213943_at	202709_at	FMOD	0.337056	0.00288694			213943_at	202934_at	HK2	-0.255641	0.0327354
	213943_at	208438_s_at	FGR	0.336971	0.0028911			213943_at	203702_s_at	TTLL4	-0.25529	0.0330163
	213943_at	202284_s_at	CDKN1A	0.336944	0.0028911			213943_at	221688_s_at	IMP3	-0.25526	0.0330163
	213943_at	203651_at	ZFYVE16	0.336839	0.0029002			213943_at	209309_at	AZGP1	-0.255228	0.0330163
	213943_at	215235_at	SPTAN1	0.336722	0.00290882			213943_at	218028_at	ELOVL1	-0.255229	0.0330163
	213943_at	219477_s_at	THSD1 / THSD1P	0.336426	0.00292997			213943_at	218405_at	ABT1	-0.254874	0.0333009
	213943_at	218087_s_at	SORBS1	0.336306	0.00293694			213943_at	201003_x_at	RNPEP / TMEM189	-0.254303	0.0337561
	213943_at	221900_at	COL8A2	0.336296	0.00293694			213943_at	202024_at	ASNA1	-0.254193	0.0338661
	213943_at	201603_at	PPP1R12A	0.33618	0.00294778			213943_at	213762_x_at	RBMX	-0.254048	0.0340206
	213943_at	217525_at	OLFML1	0.335768	0.00299456			213943_at	208939_at	SEPHS1	-0.253877	0.0342061
	213943_at	207147_at	DLX2	0.33572	0.00299456			213943_at	204066_s_at	AGAP1	-0.253752	0.0343136
	213943_at	218638_s_at	SPON2	0.335309	0.00304503			213943_at	48659_at	MIIP	-0.253636	0.034409
	213943_at	214175_x_at	PDLIM4	0.334913	0.00309798			213943_at	218616_at	INTS12	-0.253572	0.0344647
	213943_at	214375_at	LOC729222 / PPFIBP1	0.334676	0.00312762			213943_at	208313_s_at	SF1	-0.25341	0.0346173
	213943_at	213434_at	STX2	0.334545	0.00313531			213943_at	210137_s_at	DCTD	-0.253387	0.0346211
	213943_at	203903_s_at	HEPH	0.334458	0.00314089			213943_at	220147_s_at	FAM60A	-0.253351	0.034636
	213943_at	202432_at	PPP3CB	0.334384	0.00314171			213943_at	203415_at	PDCD6	-0.253264	0.0346634
	213943_at	213119_at	SLC36A1	0.334236	0.00315826			213943_at	218340_s_at	UBA6	-0.253196	0.0347142
	213943_at	209199_s_at	MEF2C	0.334178	0.00316109			213943_at	201287_s_at	SDC1	-0.253123	0.0347568
	213943_at	220117_at	ZNF385D	0.334065	0.00317232			213943_at	211971_s_at	LRPPRC	-0.25301	0.0348535
	213943_at	212873_at	HMHA1	0.3336	0.00323782			213943_at	212041_at	ATP6V0D1	-0.253006	0.0348535
	213943_at	209897_s_at	SLIT2	0.333482	0.00325013			213943_at	218947_s_at	MTPAP	-0.252869	0.0350037
	213943_at	222108_at	AMIGO2	0.333052	0.00331172			213943_at	207614_s_at	CUL1	-0.252462	0.0354196
	213943_at	207277_at	CD209	0.332699	0.00335012			213943_at	211417_x_at	GGT1	-0.252368	0.0354599
	213943_at	221899_at	N4BP2L2	0.332694	0.00335012			213943_at	210052_s_at	TPX2	-0.252365	0.0354599
	213943_at	212687_at	LIMS1	0.332585	0.0033614			213943_at	213308_at	SHANK2	-0.252194	0.0356089
	213943_at	216873_s_at	ATP8B2	0.332464	0.00337309			213943_at	217799_x_at	UBE2H	-0.252155	0.0356094
	213943_at	205944_s_at	CLTCL1	0.332435	0.00337309			213943_at	202596_at	ENSA	-0.25211	0.0356094
	213943_at	205255_x_at	TCF7	0.332134	0.00341311			213943_at	208755_x_at	H3F3A / H3F3B	-0.251771	0.0359586
	213943_at	212245_at	MCFD2	0.331879	0.00343467			213943_at	210434_x_at	JTB	-0.251575	0.0361871
	213943_at	209898_x_at	ITSN2	0.331863	0.00343467			213943_at	204178_s_at	RBM14 / RBM4	-0.251397	0.0363172
	213943_at	201694_s_at	EGR1	0.331527	0.00347738			213943_at	204202_at	IQCE	-0.25115	0.0365152
	213943_at	205653_at	CTSG	0.331412	0.00349011			213943_at	218215_s_at	NR1H2	-0.250926	0.0367333
	213943_at	205804_s_at	TRAF3IP3	0.331192	0.003514			213943_at	219786_at	MTL5	-0.250825	0.0368416
	213943_at	218871_x_at	CSGALNACT2	0.330328	0.00364835			213943_at	206016_at	CCDC22	-0.250664	0.0369645
	213943_at	203874_s_at	SMARCA1	0.330166	0.00366972			213943_at	211465_x_at	FUT6	-0.250656	0.0369645
	213943_at	204079_at	TPST2	0.330012	0.00369009			213943_at	219485_s_at	PSMD10	-0.250621	0.0369837
	213943_at	203414_at	MMD	0.329957	0.00369301			213943_at	218115_at	ASF1B	-0.250353	0.0372598
	213943_at	203055_s_at	ARHGEF1	0.329764	0.00371081			213943_at	212115_at	HN1L	-0.25004	0.0375528
	213943_at	207604_s_at	SLC4A7	0.329665	0.00371081			213943_at	209635_at	AP1S1	-0.249831	0.0378087
	213943_at	206584_at	LY96	0.329454	0.00374156			213943_at	219997_s_at	COPS7B	-0.249479	0.0381801
	213943_at	205987_at	CD1C	0.329334	0.00375602			213943_at	220966_x_at	ARPC5L	-0.249053	0.0386582
	213943_at	215179_x_at	PGF	0.328928	0.00382215			213943_at	205436_s_at	H2AFX	-0.248624	0.039013
	213943_at	215039_at	HS2ST1 / LOC339524	0.32868	0.00385909			213943_at	200862_at	DHCR24	-0.248589	0.0390282
	213943_at	220122_at	MCTP1	0.32865	0.00385909			213943_at	202475_at	TMEM147	-0.248418	0.0391674
	213943_at	204201_s_at	PTPN13	0.328197	0.0039344			213943_at	201614_s_at	RUVBL1	-0.248125	0.0394065
	213943_at	208869_s_at	GABARAPL1	0.328125	0.0039344			213943_at	209076_s_at	WDR45L	-0.24777	0.0397846
	213943_at	214683_s_at	CLK1 / PPIL3	0.32809	0.0039344			213943_at	204212_at	ACOT8	-0.247625	0.0399237
	213943_at	221760_at	MAN1A1	0.328009	0.00394203			213943_at	210027_s_at	APEX1	-0.247609	0.0399237
	213943_at	204020_at	PURA	0.327974	0.00394203			213943_at	218291_at	ROBLD3	-0.247596	0.0399237
	213943_at	204556_s_at	DZIP1	0.327852	0.00395766			213943_at	203632_s_at	GPRC5B	-0.247461	0.0400872
	213943_at	219279_at	DOCK10	0.327604	0.00399722			213943_at	220305_at	MAVS	-0.247426	0.0401106
	213943_at	218729_at	LXN	0.327461	0.00401009			213943_at	203803_at	PCYOX1	-0.246983	0.0405843
	213943_at	219310_at	TMEM90B	0.327417	0.00401154			213943_at	201013_s_at	PAICS	-0.246793	0.040773
	213943_at	222033_s_at	FLT1	0.327185	0.00403447			213943_at	203154_s_at	PAK4	-0.24659	0.0409843
	213943_at	45714_at	HCFC1R1	0.326849	0.00409165			213943_at	215758_x_at	ZNF93	-0.24619	0.0414555
	213943_at	212122_at	RHOQ	0.326577	0.00412984			213943_at	203298_s_at	JARID2	-0.24602	0.0416492
	213943_at	203799_at	CD302	0.326317	0.00417314			213943_at	203871_at	SENP3	-0.245802	0.0418862
	213943_at	212169_at	FKBP9	0.326248	0.00417972			213943_at	204031_s_at	PCBP2	-0.245468	0.042242
	213943_at	220750_s_at	LEPRE1	0.326018	0.0042177			213943_at	221189_s_at	TARS2	-0.245442	0.0422514
	213943_at	207826_s_at	ID3	0.325981	0.0042177			213943_at	202145_at	LY6E	-0.245251	0.0425068
	213943_at	209758_s_at	MFAP5	0.325778	0.00423955			213943_at	209914_s_at	NRXN1	-0.245223	0.0425144
	213943_at	204294_at	AMT	0.325654	0.00425348			213943_at	218336_at	PFDN2	-0.24521	0.0425144
	213943_at	204787_at	VSIG4	0.325241	0.00431457			213943_at	210131_x_at	SDHC	-0.244894	0.0429023
	213943_at	203301_s_at	DMTF1	0.324749	0.00437767			213943_at	40850_at	FKBP8	-0.244789	0.0430318
	213943_at	218469_at	GREM1	0.324388	0.00443701			213943_at	201717_at	MRPL49	-0.244336	0.0435487
	213943_at	213423_x_at	TUSC3	0.324308	0.00444612			213943_at	201420_s_at	WDR77	-0.244252	0.0436195
	213943_at	217853_at	TNS3	0.323953	0.00451281			213943_at	221964_at	TULP3	-0.244178	0.0436754
	213943_at	213151_s_at	SEPT7	0.323801	0.00452946			213943_at	200924_s_at	SLC3A2	-0.243478	0.0445507
	213943_at	207840_at	CD160	0.322858	0.00468555			213943_at	221772_s_at	PPP2R2D	-0.243281	0.0448004
	213943_at	213894_at	THSD7A	0.322818	0.00468649			213943_at	220587_s_at	MLST8	-0.242381	0.0459551
	213943_at	206025_s_at	TNFAIP6	0.322672	0.00471023			213943_at	201895_at	ARAF	-0.242195	0.0461245
	213943_at	206792_x_at	PDE4C	0.322566	0.00472596			213943_at	221547_at	PRPF18	-0.242101	0.0461804
	213943_at	205624_at	CPA3	0.322354	0.00476471			213943_at	218465_at	TMEM33	-0.241956	0.0463391
	213943_at	210185_at	CACNB1	0.322212	0.00478821			213943_at	201714_at	TUBG1	-0.24155	0.0468755
	213943_at	205422_s_at	ITGBL1	0.321936	0.00484183			213943_at	201350_at	FLOT2	-0.241508	0.0468931
	213943_at	219140_s_at	RBP4	0.321664	0.00489493			213943_at	202926_at	NBAS	-0.241241	0.0472297
	213943_at	203011_at	IMPA1	0.321329	0.0049552			213943_at	208910_s_at	C1QBP	-0.241114	0.0473755
	213943_at	219770_at	GTDC1	0.320618	0.00508678			213943_at	210706_s_at	RNF24	-0.240935	0.0475509
	213943_at	209473_at	ENTPD1	0.32058	0.0050874			213943_at	218448_at	C20orf11	-0.240818	0.0477123
	213943_at	221884_at	MECOM	0.320222	0.00514573			213943_at	217786_at	PRMT5	-0.240731	0.0478239
	213943_at	203282_at	GBE1	0.320193	0.00514573			213943_at	220199_s_at	AIDA	-0.240402	0.0482583
	213943_at	202242_at	TSPAN7	0.319987	0.00517797			213943_at	208773_s_at	ANKHD1	-0.240357	0.0482922
	213943_at	212724_at	RND3	0.319945	0.00517977			213943_at	220086_at	IKZF5	-0.240033	0.0488003
	213943_at	213416_at	ITGA4	0.319852	0.00518537			213943_at	219143_s_at	RPP25	-0.239981	0.0488506
	213943_at	212582_at	OSBPL8	0.319706	0.00520358			213943_at	217932_at	MRPS7	-0.239886	0.0488806
	213943_at	202693_s_at	STK17A	0.31931	0.0052824			213943_at	212018_s_at	RSL1D1	-0.239877	0.0488806
	213943_at	202990_at	PYGL	0.318969	0.00534848			213943_at	217782_s_at	GPS1	-0.239706	0.0490404
	213943_at	210944_s_at	CAPN3	0.318851	0.00536502			213943_at	202779_s_at	UBE2S	-0.239679	0.0490404
	213943_at	212197_x_at	MPRIP	0.318648	0.0053969			213943_at	205311_at	DDC	-0.239566	0.0491597
	213943_at	219240_s_at	C10orf88	0.318634	0.0053969			213943_at	213174_at	TTC9	-0.239522	0.0492031
	213943_at	219392_x_at	PRR11	0.318491	0.0054087			213943_at	202799_at	CLPP	-0.23938	0.0493556
	213943_at	213035_at	ANKRD28	0.318484	0.0054087			* False discovery rate (FDR) of 5% were applied to correct for multiple testing
	213943_at	206314_at	ZNF167	0.318137	0.00548654
	213943_at	202393_s_at	KLF10	0.317956	0.00552337
	213943_at	212918_at	RECQL	0.317823	0.00554837
	213943_at	213592_at	APLNR	0.317726	0.00556418
	213943_at	217728_at	S100A6	0.317584	0.00559163
	213943_at	213588_x_at	RPL14	0.317478	0.00561024
	213943_at	220113_x_at	POLR1B	0.317284	0.00563864
	213943_at	203989_x_at	F2R	0.317264	0.00563864
	213943_at	220252_x_at	CXorf21	0.316966	0.005707
	213943_at	205849_s_at	UQCRB	0.316733	0.00574729
	213943_at	205227_at	IL1RAP	0.316638	0.00575092
	213943_at	221565_s_at	CALHM2	0.316629	0.00575092
	213943_at	204150_at	STAB1	0.316572	0.00575688
	213943_at	209360_s_at	RUNX1	0.316523	0.00576091
	213943_at	201967_at	RBM6	0.316465	0.00576747
	213943_at	203813_s_at	SLIT3	0.31643	0.00576797
	213943_at	204719_at	ABCA8	0.316339	0.00577404
	213943_at	208634_s_at	MACF1	0.316039	0.00583166
	213943_at	204786_s_at	IFNAR2	0.316021	0.00583166
	213943_at	218723_s_at	C13orf15	0.315872	0.0058623
	213943_at	204605_at	CGRRF1	0.315777	0.005879
	213943_at	212845_at	SAMD4A	0.315656	0.00590226
	213943_at	202800_at	SLC1A3	0.315563	0.00591823
	213943_at	219985_at	HS3ST3A1	0.315493	0.00592821
	213943_at	218376_s_at	MICAL1	0.315264	0.00598098
	213943_at	204916_at	RAMP1	0.315211	0.00598615
	213943_at	200989_at	HIF1A	0.315008	0.00602209
	213943_at	210140_at	CST7	0.314981	0.00602209
	213943_at	203329_at	PTPRM	0.314528	0.00611896
	213943_at	203440_at	CDH2	0.314361	0.00615308
	213943_at	209789_at	CORO2B	0.314323	0.00615308
	213943_at	206167_s_at	ARHGAP6	0.314306	0.00615308
	213943_at	205080_at	RARB	0.314125	0.00619009
	213943_at	214118_x_at	PCM1	0.314108	0.00619009
	213943_at	200958_s_at	SDCBP	0.313783	0.00625666
	213943_at	221211_s_at	C21orf7	0.313773	0.00625666
	213943_at	203071_at	SEMA3B	0.313697	0.00626896
	213943_at	209156_s_at	COL6A2	0.313599	0.00628731
	213943_at	213261_at	LBA1	0.313197	0.00634677
	213943_at	203412_at	LZTR1	0.313078	0.00637147
	213943_at	219936_s_at	GPR87	0.313025	0.00637741
	213943_at	212457_at	TFE3	0.312741	0.00644985
	213943_at	212192_at	KCTD12	0.31267	0.00645996
	213943_at	219122_s_at	THG1L	0.312641	0.00645996
	213943_at	213071_at	DPT	0.312538	0.00647863
	213943_at	215373_x_at	SET07	0.312509	0.00647863
	213943_at	219383_at	PRR5L	0.312414	0.00647863
	213943_at	201893_x_at	DCN	0.312396	0.00647863
	213943_at	213469_at	PGAP1	0.312344	0.00648167
	213943_at	219165_at	PDLIM2	0.31204	0.00656124
	213943_at	216187_x_at	LNX1	0.312003	0.00656297
	213943_at	205257_s_at	AMPH	0.311965	0.00656468
	213943_at	213125_at	OLFML2B	0.311851	0.00658856
	213943_at	205421_at	SLC22A3	0.311663	0.0066255
	213943_at	213355_at	ST3GAL6	0.311413	0.00669067
	213943_at	204829_s_at	FOLR2	0.311321	0.00670836
	213943_at	205382_s_at	CFD	0.311258	0.00671808
	213943_at	212299_at	NEK9	0.311065	0.00675732
	213943_at	205370_x_at	DBT	0.310987	0.00677131
	213943_at	212334_at	GNS	0.31091	0.00678497
	213943_at	209818_s_at	HABP4	0.310837	0.00679743
	213943_at	212646_at	RFTN1	0.310632	0.00684868
	213943_at	208982_at	PECAM1	0.310606	0.00684868
	213943_at	217947_at	CMTM6	0.310555	0.00685491
	213943_at	221208_s_at	C11orf61	0.310411	0.00688951
	213943_at	205941_s_at	COL10A1	0.310255	0.00691827
	213943_at	211458_s_at	GABARAPL1 / GABARAPL3	0.31	0.00697741
	213943_at	220796_x_at	SLC35E1	0.309826	0.00700253
	213943_at	201981_at	PAPPA	0.309778	0.00700818
	213943_at	212886_at	CCDC69	0.309697	0.00702354
	213943_at	218316_at	TIMM9	0.309363	0.00711862
	213943_at	219167_at	RASL12	0.309169	0.00716062
	213943_at	205207_at	IL6	0.309017	0.00717961
	213943_at	209253_at	SORBS3	0.308801	0.0072288
	213943_at	204638_at	ACP5	0.308517	0.00728979
	213943_at	205201_at	GLI3	0.308512	0.00728979
	213943_at	214830_at	SLC38A6	0.308488	0.00728979
	213943_at	208944_at	TGFBR2	0.308307	0.00732875
	213943_at	212915_at	PDZRN3	0.308052	0.00740145
	213943_at	211031_s_at	CLIP2	0.30801	0.00740532
	213943_at	209682_at	CBLB	0.307901	0.00743128
	213943_at	205846_at	PTPRB	0.307612	0.00750644
	213943_at	213353_at	ABCA5	0.307522	0.00752603
	213943_at	213044_at	ROCK1	0.306692	0.00777407
	213943_at	211974_x_at	RBPJ	0.306647	0.00777935
	213943_at	215536_at	HLA-DQB2	0.306589	0.00778295
	213943_at	213309_at	PLCL2	0.306385	0.00780466
	213943_at	209324_s_at	RGS16	0.306382	0.00780466
	213943_at	219540_at	ZNF267	0.306313	0.00780515
	213943_at	201174_s_at	TERF2IP	0.306302	0.00780515
	213943_at	213334_x_at	HAUS7	0.306047	0.0078651
	213943_at	207103_at	KCND2	0.306037	0.0078651
	213943_at	205781_at	C16orf7	0.305899	0.00789211
	213943_at	204882_at	ARHGAP25	0.30576	0.00793002
	213943_at	205578_at	ROR2	0.305725	0.007932
	213943_at	219132_at	PELI2	0.305649	0.00794808
	213943_at	212850_s_at	LRP4	0.305419	0.00800769
	213943_at	218519_at	SLC35A5	0.305196	0.00806511
	213943_at	206211_at	SELE	0.305131	0.00807768
	213943_at	212110_at	SLC39A14	0.304947	0.00813218
	213943_at	220014_at	PRR16	0.304503	0.00827056
	213943_at	214770_at	MSR1	0.304501	0.00827056
	213943_at	218587_s_at	KTELC1	0.30439	0.00828769
	213943_at	218703_at	SEC22A	0.304365	0.00828769
	213943_at	213479_at	NPTX2	0.304317	0.00829453
	213943_at	207283_at	RPL23AP32	0.30427	0.00829776
	213943_at	218705_s_at	SNX24	0.304249	0.00829776
	213943_at	211795_s_at	FYB	0.304132	0.00832982
	213943_at	219386_s_at	SLAMF8	0.304102	0.00832993
	213943_at	212473_s_at	MICAL2	0.304035	0.00833306
	213943_at	209101_at	CTGF	0.303955	0.00835169
	213943_at	209354_at	TNFRSF14	0.303907	0.00835838
	213943_at	206697_s_at	HP	0.303815	0.00838141
	213943_at	214761_at	ZNF423	0.303755	0.00839253
	213943_at	37892_at	COL11A1	0.303445	0.00846399
	213943_at	219892_at	TM6SF1	0.3034	0.00846969
	213943_at	214951_at	SLC26A10	0.303315	0.00849056
	213943_at	209994_s_at	ABCB1 / ABCB4	0.303162	0.0085362
	213943_at	221046_s_at	GTPBP8	0.303029	0.00857494
	213943_at	203234_at	UPP1	0.302943	0.00859612
	213943_at	212063_at	CD44	0.302735	0.0086344
	213943_at	202555_s_at	MYLK	0.302726	0.0086344
	213943_at	203766_s_at	LMOD1	0.302547	0.00868898
	213943_at	210607_at	FLT3LG	0.302523	0.00868898
	213943_at	204776_at	THBS4	0.302255	0.00874686
	213943_at	219164_s_at	ATG2B	0.301745	0.00889746
	213943_at	203477_at	COL15A1	0.301682	0.00891095
	213943_at	203636_at	MID1	0.301486	0.00897553
	213943_at	210095_s_at	IGFBP3	0.301326	0.0090216
	213943_at	222379_at	KCNE4	0.301151	0.0090616
	213943_at	213249_at	FBXL7	0.301033	0.00909665
	213943_at	217807_s_at	GLTSCR2	0.300923	0.00911647
	213943_at	212268_at	SERPINB1	0.300898	0.00911647
	213943_at	213857_s_at	CD47	0.300823	0.00913484
	213943_at	204362_at	SKAP2	0.300382	0.00927229
	213943_at	214719_at	SLC46A3	0.299931	0.0093933
	213943_at	202682_s_at	USP4	0.29992	0.0093933
	213943_at	221800_s_at	C17orf70	0.29977	0.00944286
	213943_at	213733_at	MYO1F	0.299582	0.00950648
	213943_at	218852_at	PPP2R3C	0.299557	0.00950648
	213943_at	204690_at	STX8	0.299518	0.00951117
	213943_at	204777_s_at	MAL	0.299145	0.00964072
	213943_at	219440_at	RAI2	0.298805	0.00975826
	213943_at	202756_s_at	GPC1	0.298469	0.00987575
	213943_at	213142_x_at	PION	0.298353	0.00991305
	213943_at	206765_at	KCNJ2	0.298034	0.00998974
	213943_at	201842_s_at	EFEMP1	0.297869	0.0100365
	213943_at	212713_at	MFAP4	0.297613	0.0101344
	213943_at	220296_at	GALNT10	0.297331	0.0102301
	213943_at	205419_at	GPR183	0.297309	0.0102301
	213943_at	208335_s_at	DARC	0.296755	0.0104128
	213943_at	207339_s_at	LTB	0.296583	0.0104764
	213943_at	219487_at	BBS10	0.296494	0.010504
	213943_at	212179_at	SFRS18	0.296286	0.0105845
	213943_at	218196_at	OSTM1	0.296083	0.0106514
	213943_at	204446_s_at	ALOX5	0.296058	0.0106514
	213943_at	204011_at	SPRY2	0.296055	0.0106514
	213943_at	213080_x_at	RPL5	0.296022	0.0106541
	213943_at	208146_s_at	CPVL	0.295861	0.0107145
	213943_at	205290_s_at	BMP2	0.295591	0.0107956
	213943_at	204220_at	GMFG	0.295578	0.0107956
	213943_at	217904_s_at	BACE1	0.29541	0.0108458
	213943_at	213381_at	C10orf72	0.295269	0.0108855
	213943_at	214023_x_at	TUBB2B	0.295226	0.0108929
	213943_at	207984_s_at	MPP2	0.294987	0.0109833
	213943_at	203370_s_at	PDLIM7	0.294962	0.0109833
	213943_at	203741_s_at	ADCY7	0.294854	0.0110022
	213943_at	39650_s_at	PCNXL2	0.294623	0.0110972
	213943_at	204016_at	LARS2	0.294581	0.0111041
	213943_at	211478_s_at	DPP4	0.294252	0.0112458
	213943_at	217801_at	ATP5E	0.293884	0.0113824
	213943_at	213844_at	HOXA5	0.293749	0.0113961
	213943_at	214574_x_at	LST1	0.2937	0.0113985
	213943_at	214032_at	ZAP70	0.29369	0.0113985
	213943_at	209826_at	EGFL8 / PPT2	0.293507	0.0114685
	213943_at	202112_at	VWF	0.293491	0.0114685
	213943_at	205789_at	CD1D	0.293286	0.0115546
	213943_at	218847_at	IGF2BP2	0.293253	0.0115577
	213943_at	37424_at	CCHCR1	0.292856	0.011725
	213943_at	214686_at	ZNF266	0.292265	0.0119905
	213943_at	38964_r_at	WAS	0.292139	0.012027
	213943_at	206858_s_at	HOXC6	0.291698	0.0121718
	213943_at	213848_at	DUSP7	0.291694	0.0121718
	213943_at	218263_s_at	ZBED5	0.291572	0.0122068
	213943_at	212082_s_at	MYL6	0.291517	0.0122212
	213943_at	202388_at	RGS2	0.291491	0.0122212
	213943_at	206706_at	NTF3	0.291333	0.0122751
	213943_at	203726_s_at	LAMA3	0.290144	0.0128527
	213943_at	202087_s_at	CTSL1	0.290066	0.0128801
	213943_at	201809_s_at	ENG	0.290005	0.0128917
	213943_at	212447_at	KBTBD2	0.289579	0.0130711
	213943_at	219947_at	CLEC4A	0.289229	0.0132328
	213943_at	209960_at	HGF	0.288976	0.0133405
	213943_at	203552_at	MAP4K5	0.288973	0.0133405
	213943_at	216438_s_at	TMSB4X / TMSL3	0.288954	0.0133405
	213943_at	205437_at	ZNF211	0.288927	0.0133411
	213943_at	208986_at	TCF12	0.288873	0.0133562
	213943_at	214988_s_at	SON	0.288721	0.0134256
	213943_at	203069_at	SV2A	0.288669	0.0134402
	213943_at	209627_s_at	OSBPL3	0.288396	0.0135487
	213943_at	205599_at	TRAF1	0.288353	0.0135584
	213943_at	220088_at	C5AR1	0.288312	0.0135667
	213943_at	219230_at	TMEM100	0.288267	0.0135773
	213943_at	219042_at	LZTS1	0.287958	0.0137072
	213943_at	207030_s_at	CSRP2	0.287773	0.0137621
	213943_at	217340_at	RPL21 /RPL21P19	0.287766	0.0137621
	213943_at	209685_s_at	PRKCB	0.287749	0.0137621
	213943_at	205315_s_at	SNTB2	0.287732	0.0137621
	213943_at	218007_s_at	RPS27L	0.287693	0.0137624
	213943_at	220351_at	CCRL1	0.287666	0.0137624
	213943_at	202207_at	ARL4C	0.28761	0.0137735
	213943_at	200063_s_at	NPM1	0.287235	0.0139572
	213943_at	205682_x_at	APOM	0.287192	0.0139674
	213943_at	219478_at	WFDC1	0.287132	0.013987
	213943_at	205659_at	HDAC9	0.287068	0.0140093
	213943_at	204823_at	NAV3	0.287007	0.0140295
	213943_at	219400_at	CNTNAP1	0.28672	0.0141545
	213943_at	203323_at	CAV2	0.286713	0.0141545
	213943_at	220068_at	VPREB3	0.286689	0.0141545
	213943_at	212601_at	ZZEF1	0.286633	0.0141719
	213943_at	212865_s_at	COL14A1	0.286545	0.0142082
	213943_at	205672_at	XPA	0.28632	0.0143247
	213943_at	216356_x_at	BAIAP3	0.286145	0.0144072
	213943_at	209193_at	PIM1	0.286103	0.0144072
	213943_at	213415_at	CLIC2	0.286057	0.0144195
	213943_at	210664_s_at	TFPI	0.286019	0.0144272
	213943_at	207697_x_at	LILRB2	0.285533	0.0146523
	213943_at	207624_s_at	RPGR	0.285528	0.0146523
	213943_at	209839_at	DNM3	0.285512	0.0146523
	213943_at	221538_s_at	PLXNA1	0.285452	0.0146734
	213943_at	201300_s_at	PRNP	0.285387	0.014689
	213943_at	220002_at	KIF26B	0.285375	0.014689
	213943_at	209863_s_at	TP63	0.284965	0.0148904
	213943_at	201150_s_at	TIMP3	0.284791	0.0149656
	213943_at	212134_at	PHLDB1	0.284752	0.0149737
	213943_at	221916_at	NEFL	0.284656	0.0150171
	213943_at	218090_s_at	BRWD2	0.284388	0.0151656
	213943_at	202794_at	INPP1	0.283769	0.0154564
	213943_at	201063_at	RCN1	0.283743	0.0154574
	213943_at	201699_at	PSMC6	0.28364	0.0154909
	213943_at	209365_s_at	ECM1	0.283572	0.0155059
	213943_at	212914_at	CBX7	0.28353	0.0155067
	213943_at	206893_at	SALL1	0.283515	0.0155067
	213943_at	206481_s_at	LDB2	0.283223	0.0156573
	213943_at	201812_s_at	C4orf46 / TOMM7	0.283198	0.0156573
	213943_at	214085_x_at	GLIPR1	0.283175	0.0156573
	213943_at	203402_at	KCNAB2	0.283025	0.0157228
	213943_at	160020_at	MMP14	0.282699	0.0158501
	213943_at	201631_s_at	IER3	0.282653	0.0158501
	213943_at	205214_at	STK17B	0.282574	0.0158647
	213943_at	221933_at	NLGN4X	0.282557	0.0158647
	213943_at	202910_s_at	CD97	0.282196	0.0160798
	213943_at	212950_at	GPR116	0.282173	0.0160798
	213943_at	206540_at	GLB1L	0.281931	0.0161999
	213943_at	214639_s_at	HOXA1	0.281884	0.0162038
	213943_at	204417_at	GALC	0.281818	0.0162309
	213943_at	218574_s_at	LMCD1	0.281573	0.01635
	213943_at	212236_x_at	KRT17	0.281573	0.01635
	213943_at	219087_at	ASPN	0.281563	0.01635
	213943_at	216210_x_at	TRIOBP	0.281418	0.0163977
	213943_at	220356_at	CORIN	0.280979	0.0166289
	213943_at	219594_at	NINJ2	0.280947	0.0166289
	213943_at	209612_s_at	ADH1B	0.280845	0.016681
	213943_at	205330_at	MN1	0.280661	0.0167876
	213943_at	218824_at	PNMAL1	0.280631	0.0167913
	213943_at	211756_at	PTHLH	0.280515	0.0168376
	213943_at	211996_s_at	LOC100132247 /LOC348162	0.280486	0.0168408
	213943_at	209286_at	CDC42EP3	0.28028	0.0169475
	213943_at	61734_at	RCN3	0.279977	0.0171042
	213943_at	205542_at	STEAP1	0.279916	0.0171295
	213943_at	204861_s_at	NAIP	0.279706	0.0172402
	213943_at	213488_at	SNED1	0.279606	0.0172928
	213943_at	204469_at	PTPRZ1	0.279577	0.0172963
	213943_at	203499_at	EPHA2	0.279509	0.0173267
	213943_at	201935_s_at	EIF4G3	0.279351	0.0174192
	213943_at	211071_s_at	MLLT11	0.27919	0.0174813
	213943_at	218490_s_at	ZNF302	0.27878	0.0176845
	213943_at	206730_at	GRIA3	0.278669	0.0177456
	213943_at	212796_s_at	TBC1D2B	0.27841	0.017879
	213943_at	209436_at	SPON1	0.278294	0.0179111
	213943_at	219169_s_at	TFB1M	0.278255	0.0179214
	213943_at	210026_s_at	CARD10	0.278208	0.0179384
	213943_at	201061_s_at	STOM	0.278003	0.0180675
	213943_at	218155_x_at	TSR1	0.27795	0.0180884
	213943_at	209570_s_at	D4S234E	0.277821	0.018147
	213943_at	209921_at	SLC7A11	0.277587	0.0182988
	213943_at	205139_s_at	UST	0.277514	0.0183176
	213943_at	219602_s_at	FAM38B	0.277217	0.0184823
	213943_at	221207_s_at	NBEA	0.277134	0.018509
	213943_at	210220_at	FZD2	0.277103	0.018514
	213943_at	206637_at	P2RY14	0.277007	0.0185514
	213943_at	204392_at	CAMK1	0.277006	0.0185514
	213943_at	215529_x_at	DIP2A	0.276903	0.0185922
	213943_at	213953_at	KRT20	0.276762	0.0186614
	213943_at	206467_x_at	RTEL1 / TNFRSF6B	0.276685	0.0186796
	213943_at	209723_at	SERPINB9	0.276671	0.0186796
	213943_at	220036_s_at	LMBR1L	0.276668	0.0186796
	213943_at	218642_s_at	CHCHD7	0.27663	0.0186907
	213943_at	33322_i_at	SFN	0.276513	0.0187594
	213943_at	204276_at	TK2	0.276414	0.0188159
	213943_at	200833_s_at	hCG_1757335 / RAP1B	0.276226	0.0189033
	213943_at	205109_s_at	ARHGEF4	0.27619	0.0189131
	213943_at	213608_s_at	SRRD	0.275989	0.019012
	213943_at	205641_s_at	TRADD	0.275908	0.0190556
	213943_at	210252_s_at	MADD	0.275782	0.0191313
	213943_at	206635_at	CHRNB2	0.27562	0.0192353
	213943_at	213975_s_at	LYZ	0.275453	0.0193447
	213943_at	201329_s_at	ETS2	0.275183	0.0195159
	213943_at	52159_at	HEMK1	0.275073	0.0195814
	213943_at	207069_s_at	SMAD6	0.274629	0.0198536
	213943_at	213238_at	ATP10D	0.274544	0.0198913
	213943_at	205260_s_at	ACYP1	0.274534	0.0198913
	213943_at	215241_at	ANO3	0.27434	0.0200255
	213943_at	200701_at	NPC2	0.274053	0.0202144
	213943_at	214003_x_at	RPS20	0.274027	0.0202171
	213943_at	213524_s_at	G0S2	0.273927	0.0202776
	213943_at	201494_at	PRCP	0.273837	0.0203305
	213943_at	201987_at	MED13	0.273805	0.0203386
	213943_at	204442_x_at	LTBP4	0.273731	0.0203659
	213943_at	202797_at	SACM1L	0.273669	0.0203907
	213943_at	205174_s_at	QPCT	0.273625	0.0203918
	213943_at	204837_at	MTMR9	0.273624	0.0203918
	213943_at	219908_at	DKK2	0.273515	0.0204398
	213943_at	38671_at	PLXND1	0.273495	0.0204398
	213943_at	215785_s_at	CYFIP2	0.273425	0.0204746
	213943_at	221740_x_at	LRRC37A2	0.273232	0.0205586
	213943_at	219002_at	FASTKD1	0.27317	0.0205903
	213943_at	209912_s_at	KIAA0415	0.272899	0.0207847
	213943_at	204912_at	IL10RA	0.272866	0.0207847
	213943_at	209345_s_at	PI4K2A	0.272838	0.0207847
	213943_at	218113_at	TMEM2	0.272273	0.0211697
	213943_at	203607_at	INPP5F	0.272184	0.0212244
	213943_at	205907_s_at	OMD	0.271711	0.0215425
	213943_at	207760_s_at	NCOR2	0.271567	0.0216253
	213943_at	203538_at	CAMLG	0.271506	0.0216546
	213943_at	209481_at	SNRK	0.271474	0.0216546
	213943_at	202409_at	IGF2 / INS-IGF2	0.271415	0.0216777
	213943_at	219371_s_at	KLF2	0.271335	0.0217218
	213943_at	205572_at	ANGPT2	0.271316	0.0217218
	213943_at	213556_at	LOC390940	0.271164	0.0217994
	213943_at	206790_s_at	NDUFB1	0.271157	0.0217994
	213943_at	203887_s_at	THBD	0.271078	0.0218474
	213943_at	212624_s_at	CHN1	0.270997	0.0218972
	213943_at	209688_s_at	CCDC93	0.270972	0.0219
	213943_at	205361_s_at	PFDN4	0.270768	0.0220539
	213943_at	207175_at	ADIPOQ	0.270587	0.0221878
	213943_at	213325_at	PVRL3	0.270385	0.0223222
	213943_at	202419_at	KDSR	0.270304	0.022354
	213943_at	212536_at	ATP11B	0.270105	0.0224637
	213943_at	202181_at	KIAA0247	0.270087	0.0224637
	213943_at	212736_at	C16orf45	0.269677	0.0227434
	213943_at	203729_at	EMP3	0.269558	0.022808
	213943_at	204158_s_at	TCIRG1	0.269464	0.0228582
	213943_at	219654_at	PTPLA	0.269394	0.0228874
	213943_at	212880_at	WDR7	0.269379	0.0228874
	213943_at	205637_s_at	SH3GL3	0.269352	0.0228874
	213943_at	214913_at	ADAMTS3	0.268986	0.0231383
	213943_at	209370_s_at	SH3BP2	0.268839	0.0232492
	213943_at	208091_s_at	VOPP1	0.268681	0.0233562
	213943_at	213801_x_at	RPSA	0.268649	0.0233594
	213943_at	219479_at	KDELC1	0.268627	0.0233594
	213943_at	214594_x_at	ATP8B1	0.268575	0.0233872
	213943_at	211956_s_at	EIF1	0.268317	0.0235794
	213943_at	211452_x_at	LRRFIP1	0.268226	0.0236272
	213943_at	200061_s_at	RPS24	0.268207	0.0236272
	213943_at	204032_at	BCAR3	0.268199	0.0236272
	213943_at	212509_s_at	MXRA7	0.268152	0.0236477
	213943_at	202570_s_at	DLGAP4	0.268086	0.0236874
	213943_at	214841_at	CNIH3	0.267746	0.0239183
	213943_at	212480_at	CYTSA	0.267688	0.0239361
	213943_at	211178_s_at	PSTPIP1	0.26758	0.02401
	213943_at	209879_at	SELPLG	0.267214	0.0242862
	213943_at	213056_at	FRMD4B	0.267026	0.0244258
	213943_at	217719_at	EIF3L	0.266936	0.0244834
	213943_at	206227_at	CILP	0.266795	0.0245943
	213943_at	213370_s_at	SFMBT1	0.266568	0.0247252
	213943_at	220046_s_at	CCNL1	0.26643	0.0248355
	213943_at	210069_at	CHKB-CPT1B / CPT1B	0.266386	0.0248468
	213943_at	214748_at	N4BP2L2	0.266354	0.0248468
	213943_at	219546_at	BMP2K	0.266183	0.0249873
	213943_at	219666_at	MS4A6A	0.265969	0.0251687
	213943_at	213058_at	TTC28	0.265853	0.0252593
	213943_at	222028_at	ZNF45	0.265664	0.0254196
	213943_at	219891_at	PGPEP1	0.265599	0.0254277
	213943_at	220495_s_at	TXNDC15	0.265592	0.0254277
	213943_at	209351_at	KRT14	0.265389	0.0256028
	213943_at	217769_s_at	POMP	0.265289	0.0256318
	213943_at	201313_at	ENO2	0.265195	0.0256653
	213943_at	215092_s_at	NFAT5	0.26505	0.0257711
	213943_at	206460_at	AJAP1	0.265043	0.0257711
	213943_at	207012_at	MMP16	0.264951	0.0258399
	213943_at	203024_s_at	C5orf15	0.26491	0.0258558
	213943_at	218288_s_at	CCDC90B	0.264811	0.0258936
	213943_at	205405_at	SEMA5A	0.264676	0.026004
	213943_at	202328_s_at	PKD1	0.264654	0.0260051
	213943_at	210592_s_at	SAT1	0.264554	0.0260435
	213943_at	219837_s_at	CYTL1	0.264551	0.0260435
	213943_at	202075_s_at	PLTP	0.26446	0.0261116
	213943_at	219511_s_at	SNCAIP	0.264364	0.0261704
	213943_at	215567_at	FCF1	0.264358	0.0261704
	213943_at	204686_at	IRS1	0.264335	0.026173
	213943_at	219532_at	ELOVL4	0.2641	0.0263424
	213943_at	206638_at	HTR2B	0.26406	0.0263424
	213943_at	204076_at	ENTPD4	0.263986	0.0263906
	213943_at	218687_s_at	MUC13	0.263966	0.0263906
	213943_at	213677_s_at	PMS1	0.263922	0.0264146
	213943_at	206070_s_at	EPHA3	0.263787	0.0264827
	213943_at	204440_at	CD83	0.263747	0.0264827
	213943_at	219655_at	C7orf10	0.2637	0.0265082
	213943_at	219838_at	TTC23	0.263629	0.0265399
	213943_at	60528_at	JMJD7-PLA2G4B / PLA2G4B	0.263622	0.0265399
	213943_at	213375_s_at	N4BP2L1	0.263606	0.0265399
	213943_at	213496_at	LPPR4	0.263526	0.0265889
	213943_at	206551_x_at	KLHL24	0.26347	0.0266125
	213943_at	205998_x_at	CYP3A4	0.263439	0.0266186
	213943_at	219291_at	DTWD1	0.263423	0.0266186
	213943_at	219873_at	COLEC11	0.263345	0.0266749
	213943_at	201272_at	AKR1B1	0.263322	0.0266771
	213943_at	210757_x_at	DAB2	0.262961	0.0269554
	213943_at	212772_s_at	ABCA2	0.262828	0.0270685
	213943_at	219315_s_at	TMEM204	0.262699	0.027178
	213943_at	206278_at	PTAFR	0.262554	0.0273054
	213943_at	208017_s_at	MCF2	0.262225	0.0276215
	213943_at	212820_at	DMXL2	0.262017	0.0277968
	213943_at	219523_s_at	ODZ3	0.261641	0.0281536
	213943_at	214110_s_at	LSP1	0.261629	0.0281536
	213943_at	201497_x_at	MYH11	0.261344	0.0283447
	213943_at	201738_at	EIF1B	0.261162	0.028478
	213943_at	206236_at	GPR4	0.261155	0.028478
	213943_at	202410_x_at	IGF2 / INS-IGF2	0.260909	0.0287159
	213943_at	218885_s_at	GALNT12	0.260836	0.0287729
	213943_at	200891_s_at	SSR1	0.260803	0.0287847
	213943_at	201031_s_at	HNRNPH1	0.260672	0.0289027
	213943_at	203845_at	KAT2B	0.260407	0.0291462
	213943_at	204948_s_at	FST	0.260404	0.0291462
	213943_at	219397_at	COQ10B	0.260297	0.029195
	213943_at	201360_at	CST3	0.260214	0.0292641
	213943_at	212616_at	CHD9	0.260088	0.0293556
	213943_at	210889_s_at	FCGR2B	0.260062	0.0293621
	213943_at	213527_s_at	ZNF688	0.259971	0.0294149
	213943_at	200779_at	ATF4	0.259552	0.0297842
	213943_at	219334_s_at	OBFC2A	0.259334	0.0299791
	213943_at	218573_at	MAGEH1	0.259308	0.0299851
	213943_at	220102_at	FOXL2	0.259229	0.0300334
	213943_at	204040_at	RNF144A	0.259087	0.0301365
	213943_at	221193_s_at	ZCCHC10	0.259069	0.0301365
	213943_at	212851_at	DCUN1D4	0.25862	0.030615
	213943_at	218501_at	ARHGEF3	0.258517	0.0306943
	213943_at	205466_s_at	HS3ST1	0.258489	0.0306943
	213943_at	213566_at	RNASE6	0.258463	0.0307013
	213943_at	218071_s_at	MKRN2	0.258392	0.0307189
	213943_at	204030_s_at	SCHIP1	0.258385	0.0307189
	213943_at	212793_at	DAAM2	0.258317	0.0307552
	213943_at	203385_at	DGKA	0.258238	0.0307552
	213943_at	205101_at	CIITA	0.258199	0.0307552
	213943_at	49306_at	RASSF4	0.258193	0.0307552
	213943_at	203880_at	COX17	0.257811	0.0310942
	213943_at	209047_at	AQP1 / INMT	0.257744	0.0311475
	213943_at	212651_at	RHOBTB1	0.257547	0.0312795
	213943_at	219855_at	NUDT11	0.257508	0.0312795
	213943_at	212964_at	HIC2	0.257441	0.0313109
	213943_at	219183_s_at	CYTH4	0.257266	0.0314643
	213943_at	212146_at	PLEKHM2	0.257172	0.0315061
	213943_at	218675_at	SLC22A17	0.257172	0.0315061
	213943_at	203002_at	AMOTL2	0.257171	0.0315061
	213943_at	208718_at	DDX17	0.256882	0.0318159
	213943_at	221752_at	SSH1	0.256818	0.0318477
	213943_at	219598_s_at	RWDD1	0.256795	0.0318477
	213943_at	201094_at	RPS29	0.256566	0.0320044
	213943_at	217789_at	SNX6	0.25656	0.0320044
	213943_at	214429_at	MTMR6	0.256412	0.0320677
	213943_at	208450_at	LGALS2	0.256399	0.0320677
	213943_at	217404_s_at	COL2A1	0.256398	0.0320677
	213943_at	204022_at	WWP2	0.256376	0.0320677
	213943_at	212843_at	NCAM1	0.256376	0.0320677
	213943_at	200012_x_at	RPL21	0.256366	0.0320677
	213943_at	201042_at	TGM2	0.256341	0.032075
	213943_at	200066_at	IK	0.256251	0.0321366
	213943_at	204854_at	GPR162 / LEPREL2	0.256248	0.0321366
	213943_at	204959_at	MNDA	0.255889	0.0325359
	213943_at	204950_at	CARD8	0.255767	0.0326347
	213943_at	209466_x_at	PTN	0.255767	0.0326347
	213943_at	45288_at	ABHD6	0.255622	0.0327354
	213943_at	215221_at	FOXP1	0.255383	0.0329893
	213943_at	220988_s_at	AMACR /C1QTNF3	0.25537	0.0329893
	213943_at	219307_at	PDSS2	0.255277	0.0330163
	213943_at	218793_s_at	SCML1	0.255254	0.0330163
	213943_at	203097_s_at	RAPGEF2	0.255183	0.0330468
	213943_at	204897_at	PTGER4	0.255138	0.0330773
	213943_at	200696_s_at	GSN	0.255106	0.0330928
	213943_at	211964_at	COL4A2	0.255002	0.0331881
	213943_at	204714_s_at	F5	0.254987	0.0331881
	213943_at	220748_s_at	ZNF580	0.254796	0.0333701
	213943_at	201338_x_at	GTF3A	0.254619	0.0335576
	213943_at	202227_s_at	BRD8	0.254603	0.0335576
	213943_at	221290_s_at	MUM1	0.254508	0.0336503
	213943_at	213251_at	SMARCA5	0.254448	0.0336982
	213943_at	219157_at	KLHL2	0.2544	0.0337324
	213943_at	211771_s_at	POU2F2	0.254362	0.0337324
	213943_at	204568_at	KIAA0831	0.254361	0.0337324
	213943_at	209304_x_at	GADD45B	0.254309	0.0337561
	213943_at	207610_s_at	EMR2	0.253761	0.0343136
	213943_at	221478_at	BNIP3L	0.253671	0.0343888
	213943_at	213934_s_at	ZNF23	0.253542	0.034476
	213943_at	221794_at	DOCK6	0.253336	0.034636
	213943_at	203843_at	RPS6KA3	0.253314	0.0346382
	213943_at	204712_at	WIF1	0.253256	0.0346634
	213943_at	221658_s_at	IL21R	0.253123	0.0347568
	213943_at	212869_x_at	TPT1	0.252729	0.0351551
	213943_at	219935_at	ADAMTS5	0.252653	0.0352258
	213943_at	208302_at	HMHB1	0.252599	0.0352701
	213943_at	219471_at	C13orf18	0.252359	0.0354599
	213943_at	205933_at	SETBP1	0.252353	0.0354599
	213943_at	213396_s_at	AKAP10	0.252327	0.0354688
	213943_at	212313_at	CHMP7	0.252178	0.0356089
	213943_at	209555_s_at	CD36	0.252126	0.0356094
	213943_at	215811_at	SNCA	0.252101	0.0356094
	213943_at	209582_s_at	CD200	0.251859	0.0358951
	213943_at	216620_s_at	ARHGEF10	0.251823	0.0359167
	213943_at	218223_s_at	PLEKHO1	0.251532	0.0362186
	213943_at	201289_at	CYR61	0.251494	0.0362414
	213943_at	202016_at	MEST	0.251404	0.0363172
	213943_at	213160_at	DOCK2	0.251298	0.0364221
	213943_at	218396_at	VPS13C	0.251252	0.0364481
	213943_at	200026_at	RPL34	0.251223	0.0364481
	213943_at	219559_at	SLC17A9	0.25122	0.0364481
	213943_at	218247_s_at	MEX3C	0.251098	0.0365501
	213943_at	203561_at	FCGR2A	0.251085	0.0365501
	213943_at	200986_at	SERPING1	0.250682	0.0369645
	213943_at	210116_at	SH2D1A	0.250654	0.0369645
	213943_at	218791_s_at	C15orf29	0.250518	0.0370943
	213943_at	221728_x_at	XIST	0.250349	0.0372598
	213943_at	219452_at	DPEP2	0.250337	0.0372598
	213943_at	218310_at	KCTD7 / RABGEF1	0.25015	0.0374824
	213943_at	202992_at	C7	0.250056	0.0375528
	213943_at	203413_at	NELL2	0.250047	0.0375528
	213943_at	203659_s_at	TRIM13	0.249792	0.037823
	213943_at	203233_at	IL4R	0.249782	0.037823
	213943_at	221958_s_at	GPR177	0.249488	0.0381801
	213943_at	208266_at	C8orf17	0.24942	0.0382351
	213943_at	37549_g_at	BBS9	0.249299	0.0383735
	213943_at	222073_at	COL4A3	0.249243	0.038424
	213943_at	204438_at	MRC1 / MRC1L1	0.248973	0.038741
	213943_at	201296_s_at	WSB1	0.248908	0.0388033
	213943_at	221911_at	ETV1	0.24889	0.0388033
	213943_at	208836_at	ATP1B3	0.248857	0.0388238
	213943_at	205384_at	FXYD1	0.248785	0.0388964
	213943_at	206448_at	ZNF365	0.248725	0.0389442
	213943_at	202778_s_at	ZMYM2	0.248712	0.0389442
	213943_at	216903_s_at	CBARA1	0.248679	0.0389632
	213943_at	201575_at	SNW1	0.248567	0.0390282
	213943_at	209734_at	NCKAP1L	0.248556	0.0390282
	213943_at	219282_s_at	TRPV2	0.248538	0.0390282
	213943_at	212690_at	DDHD2	0.248383	0.0391787
	213943_at	204527_at	MYO5A	0.248357	0.0391787
	213943_at	213111_at	PIKFYVE	0.248354	0.0391787
	213943_at	215513_at	HYMAI	0.248245	0.0393049
	213943_at	206600_s_at	SLC16A5	0.248179	0.0393695
	213943_at	216860_s_at	GDF11	0.248115	0.0394065
	213943_at	218472_s_at	PELO	0.247908	0.0396687
	213943_at	209096_at	UBE2V2	0.247854	0.039719
	213943_at	202524_s_at	SPOCK2	0.247809	0.0397567
	213943_at	203804_s_at	LUC7L3	0.247615	0.0399237
	213943_at	219463_at	C20orf103	0.247384	0.0401423
	213943_at	211745_x_at	HBA1 / HBA2	0.24733	0.0401934
	213943_at	201739_at	SGK1	0.247206	0.0403424
	213943_at	219100_at	OBFC1	0.247183	0.0403491
	213943_at	203433_at	MTHFS	0.246981	0.0405843
	213943_at	218839_at	HEY1	0.246929	0.0406308
	213943_at	202949_s_at	FHL2	0.246906	0.0406372
	213943_at	201307_at	SEPT11	0.246703	0.0408756
	213943_at	204051_s_at	SFRP4	0.246664	0.0409039
	213943_at	213331_s_at	NEK1	0.246496	0.041092
	213943_at	219656_at	PCDH12	0.246329	0.0412907
	213943_at	200603_at	PRKAR1A	0.246322	0.0412907
	213943_at	201395_at	RBM5	0.246093	0.0415682
	213943_at	217757_at	A2M	0.245935	0.0417452
	213943_at	210609_s_at	TP53I3	0.245822	0.0418834
	213943_at	209684_at	RIN2	0.245689	0.0420242
	213943_at	213411_at	ADAM22	0.245666	0.042031
	213943_at	209763_at	CHRDL1	0.2456	0.0421005
	213943_at	204153_s_at	MFNG	0.245541	0.0421604
	213943_at	218896_s_at	C17orf85	0.24501	0.042784
	213943_at	204789_at	FMNL1	0.244911	0.0429023
	213943_at	203868_s_at	VCAM1	0.244745	0.043069
	213943_at	200795_at	SPARCL1	0.244384	0.0435487
	213943_at	204790_at	SMAD7	0.244375	0.0435487
	213943_at	49329_at	KLHL22	0.244349	0.0435487
	213943_at	219689_at	SEMA3G	0.24434	0.0435487
	213943_at	210718_s_at	ARL17P1 / LOC100294341	0.244272	0.0436178
	213943_at	214297_at	CSPG4	0.244184	0.0436754
	213943_at	211433_x_at	KIAA1539	0.244146	0.0436972
	213943_at	204655_at	CCL5	0.243962	0.0439501
	213943_at	203973_s_at	CEBPD	0.243936	0.043961
	213943_at	209867_s_at	LPHN3	0.243731	0.0442469
	213943_at	205120_s_at	SGCB	0.243611	0.0444037
	213943_at	212744_at	BBS4	0.243511	0.0445295
	213943_at	209373_at	MALL	0.243323	0.0447633
	213943_at	201765_s_at	HEXA	0.243207	0.0448869
	213943_at	203649_s_at	PLA2G2A	0.243137	0.0449666
	213943_at	220334_at	RGS17	0.243009	0.0451383
	213943_at	203944_x_at	BTN2A1	0.242901	0.0452791
	213943_at	210018_x_at	MALT1	0.242656	0.0456343
	213943_at	209189_at	FOS	0.242601	0.0456698
	213943_at	203508_at	TNFRSF1B	0.242597	0.0456698
	213943_at	215548_s_at	SCFD1	0.242382	0.0459551
	213943_at	211734_s_at	FCER1A	0.242315	0.0460311
	213943_at	212788_x_at	FTL	0.242233	0.0461245
	213943_at	204018_x_at	HBA1 / HBA2	0.242195	0.0461245
	213943_at	220141_at	C11orf63	0.242182	0.0461245
	213943_at	204053_x_at	PTEN	0.242124	0.0461804
	213943_at	213823_at	HOXA11	0.242093	0.0461804
	213943_at	203645_s_at	CD163	0.242031	0.0462505
	213943_at	203678_at	MTMR15	0.241939	0.0463391
	213943_at	217945_at	BTBD1	0.241679	0.0467271
	213943_at	201041_s_at	DUSP1	0.241608	0.0468112
	213943_at	213078_x_at	LPCAT4	0.241503	0.0468931
	213943_at	204604_at	PFTK1	0.241356	0.0471006
	213943_at	212642_s_at	HIVEP2	0.241302	0.0471593
	213943_at	218301_at	RNPEPL1	0.241118	0.0473755
	213943_at	215051_x_at	AIF1	0.241066	0.0474075
	213943_at	200974_at	ACTA2	0.241053	0.0474075
	213943_at	218109_s_at	MFSD1	0.241041	0.0474075
	213943_at	212209_at	MED13L	0.240547	0.0480973
	213943_at	201210_at	DDX3X	0.240473	0.0481902
	213943_at	218589_at	LPAR6	0.240396	0.0482583
	213943_at	209404_s_at	TMED7	0.239966	0.0488506
	213943_at	200763_s_at	RPLP1	0.239928	0.0488806
	213943_at	204297_at	PIK3C3	0.239903	0.0488806
	213943_at	217795_s_at	TMEM43	0.239689	0.0490404
	213943_at	209272_at	NAB1	0.239689	0.0490404
	213943_at	207166_at	GNGT1	0.239687	0.0490404
	213943_at	201443_s_at	ATP6AP2	0.239673	0.0490404
	213943_at	204089_x_at	MAP3K4	0.239641	0.0490645
	213943_at	203467_at	PMM1	0.239369	0.0493556
	213943_at	209542_x_at	IGF1	0.239368	0.0493556
	213943_at	214902_x_at	FLJ42393	0.23936	0.0493556
	213943_at	202888_s_at	ANPEP	0.239302	0.0494232
	213943_at	213958_at	CD6	0.239108	0.0497222
	213943_at	203951_at	CNN1	0.239025	0.0498306
	213943_at	219737_s_at	PCDH9	0.238973	0.0498888
	213943_at	203409_at	DDB2	0.238897	0.049988
	* False discovery rate (FDR) of 5% were applied to correct for multiple testing

## Sheet: Table S13
Supplementary Table 11: Significant pathways predicted from KEGG database in LNN/ER-negative patients		Table S13: Significant pathways predicted from KEGG database in LNN/ER-negative patients
Gene name			Map title	Category	Gene name	Fisher's exact P value
ACTN1(87)		1	Focal adhesion(hsa04510)	Cell Communication/Cellular Processes	ACTN1(87), AKT1(207), CAV1(857), CCND2(894), COL11A1(1301), COL1A1(1277), COL1A2(1278), COL3A1(1281), COL4A1(1282), COL5A1(1289), COL5A2(1290), COL6A1(1291), COL6A2(1292), COL6A3(1293), COMP(1311), FLNC(2318), FLT1(2321), FN1(2335), FYN(2534), ITGA4(3676), ITGA5(3678), ITGAV(3685), ITGB5(3693), LAMA2(3908), LAMA4(3910), LAMB1(3912), LAMB2(3913), LAMC1(3915), MYLK(4638), PAK3(5063), PDGFB(5155), P…	0		,
CD44(960)		2	ECM-receptor interaction(hsa04512)	Signaling Molecules and Interaction/Environmental Information Processing	CD44(960), CD47(961), COL11A1(1301), COL1A1(1277), COL1A2(1278), COL3A1(1281), COL4A1(1282), COL5A1(1289), COL5A2(1290), COL6A1(1291), COL6A2(1292), COL6A3(1293), COMP(1311), FN1(2335), HSPG2(3339), ITGA4(3676), ITGA5(3678), ITGAV(3685), ITGB5(3693), LAMA2(3908), LAMA4(3910), LAMB1(3912), LAMB2(3913), LAMC1(3915), SDC2(6383), THBS2(7058), THBS4(7060), VWF(7450)	0
ACTN1(87)		3	Amoebiasis(hsa05146)	Infectious Diseases/Human Diseases	ACTN1(87), CD1D(912), COL11A1(1301), COL1A1(1277), COL1A2(1278), COL3A1(1281), COL4A1(1282), COL5A1(1289), COL5A2(1290), CTSG(1511), FN1(2335), IL1R1(3554), IL6(3569), LAMA2(3908), LAMA4(3910), LAMB1(3912), LAMB2(3913), LAMC1(3915), PIK3CD(5293), PIK3R3(8503), SERPINB1(1992)	3e-06
COL11A1(1301)		4	Protein digestion and absorption(hsa04974)	Digestive System/Organismal Systems	COL11A1(1301), COL15A1(1306), COL18A1(80781), COL1A1(1277), COL1A2(1278), COL3A1(1281), COL4A1(1282), COL5A1(1289), COL5A2(1290), COL6A1(1291), COL6A2(1292), COL6A3(1293), CPA3(1359), DPP4(1803), MME(4311), SLC36A1(206358)	5e-05
AKT1(207)		5	Pathways in cancer(hsa05200)	Cancers/Human Diseases	AKT1(207), BMP2(650), CBLB(868), CDKN1A(1026), COL4A1(1282), FGF1(2246), FLT3LG(2323), FN1(2335), FOXO1(2308), FZD10(11211), GLI3(2737), HIF1A(3091), HSP90AB1(3326), IL6(3569), ITGAV(3685), JUP(3728), LAMA2(3908), LAMA4(3910), LAMB1(3912), LAMB2(3913), LAMC1(3915), LEF1(51176), MECOM(2122), MITF(4286), MMP2(4313), MMP9(4318), PDGFB(5155), PDGFRA(5156), PDGFRB(5159), PGF(5228), PIK3CD(5293), PIK3R…	6e-05
ACTN1(87)		6	Arrhythmogenic right ventricular cardiomyopathy (ARVC)(hsa05412)	Cardiovascular Diseases/Human Diseases	ACTN1(87), CACNB1(782), CDH2(1000), GJA1(2697), ITGA4(3676), ITGA5(3678), ITGAV(3685), ITGB5(3693), JUP(3728), LAMA2(3908), LEF1(51176), SGCD(6444), TCF7(6932), TCF7L2(6934)	0.0002
ACTN1(87)		7	Leukocyte transendothelial migration(hsa04670)	Immune System/Organismal Systems	ACTN1(87), CLDN3(1365), CLDN4(1364), CLDN5(7122), CLDN7(1366), CXCL12(6387), F11R(50848), ITGA4(3676), JAM2(58494), JAM3(83700), MMP2(4313), MMP9(4318), PECAM1(5175), PIK3CD(5293), PIK3R3(8503), ROCK1(6093), THY1(7070)	0.0011
CD8A(925)		8	Cell adhesion molecules (CAMs)(hsa04514)	Signaling Molecules and Interaction/Environmental Information Processing	CD8A(925), CDH2(1000), CLDN3(1365), CLDN4(1364), CLDN5(7122), CLDN7(1366), F11R(50848), HLA-DPA1(3113), ITGA4(3676), ITGAV(3685), JAM2(58494), JAM3(83700), MPZL1(9019), PECAM1(5175), PTPRM(5797), SDC2(6383), SELE(6401), VCAN(1462)	0.0026
ACTN1(87)		9	Regulation of actin cytoskeleton(hsa04810)	Cell Motility/Cellular Processes	ACTN1(87), ARHGEF1(9138), ARPC1A(10552), ARPC2(10109), BDKRB2(624), F2R(2149), FGF1(2246), FN1(2335), ITGA4(3676), ITGA5(3678), ITGAE(3682), ITGAV(3685), ITGB5(3693), MYLK(4638), PAK3(5063), PDGFB(5155), PDGFC(56034), PDGFRA(5156), PDGFRB(5159), PIK3CD(5293), PIK3R3(8503), PIKFYVE(200576), PPP1CA(5499), PPP1R12A(4659), ROCK1(6093)	0.003
BDKRB2(624)		10	Complement and coagulation cascades(hsa04610)	Immune System/Organismal Systems	BDKRB2(624), C1R(715), C1S(716), CFD(1675), CFH(3075), F13A1(2162), F2R(2149), PLAT(5327), PLAU(5328), PROS1(5627), VWF(7450)	0.004
AKT1(207)		11	Prostate cancer(hsa05215)	Cancers/Human Diseases	AKT1(207), CDKN1A(1026), FOXO1(2308), HSP90AB1(3326), LEF1(51176), PDGFB(5155), PDGFC(56034), PDGFRA(5156), PDGFRB(5159), PIK3CD(5293), PIK3R3(8503), TCF7(6932), TCF7L2(6934)	0.0045
ACP5(54)		12	Lysosome(hsa04142)	Transport and Catabolism/Cellular Processes	ACP5(54), AP1M2(10053), ATP6AP1(537), ATP6V0B(533), CLN3(1201), CLTCL1(8218), CTSB(1508), CTSG(1511), CTSK(1513), GLB1(2720), GNPTAB(79158), GNS(2799), HEXB(3074), NAPSA(9476), NPC1(4864), TPP1(1200)	0.0047
COMP(1311)		13	Malaria(hsa05144)	Infectious Diseases/Human Diseases	COMP(1311), DARC(2532), IL6(3569), LRP1(4035), PECAM1(5175), SDC2(6383), SELE(6401), THBS2(7058), THBS4(7060)	0.0049
ACTN1(87)		14	Adherens junction(hsa04520)	Cell Communication/Cellular Processes	ACTN1(87), FYN(2534), LEF1(51176), PARD3(56288), PTPRB(5787), PTPRM(5797), SNAI2(6591), SORBS1(10580), TCF7(6932), TCF7L2(6934), TGFBR2(7048)	0.007
AKT1(207)		15	Small cell lung cancer(hsa05222)	Cancers/Human Diseases	AKT1(207), COL4A1(1282), FN1(2335), ITGAV(3685), LAMA2(3908), LAMA4(3910), LAMB1(3912), LAMB2(3913), LAMC1(3915), PIK3CD(5293), PIK3R3(8503), RARB(5915)	0.008
CD1C(911)		16	Hematopoietic cell lineage(hsa04640)	Immune System/Organismal Systems	CD1C(911), CD1D(912), CD44(960), CD8A(925), FLT3LG(2323), IL11RA(3590), IL1R1(3554), IL6(3569), IL7R(3575), ITGA4(3676), ITGA5(3678), MME(4311)	0.011
AKT1(207)		17	Acute myeloid leukemia(hsa05221)	Cancers/Human Diseases	AKT1(207), JUP(3728), LEF1(51176), PIK3CD(5293), PIK3R3(8503), RUNX1(861), RUNX1T1(862), TCF7(6932), TCF7L2(6934)	0.012
ACP5(54)		18	Rheumatoid arthritis(hsa05323)	Immune System Diseases/Human Diseases	ACP5(54), ATP6AP1(537), ATP6V0B(533), CTSK(1513), CXCL12(6387), FLT1(2321), HLA-DPA1(3113), IL6(3569), LTB(4050), MMP3(4314), PGF(5228), TEK(7010)	0.015
ARPC1A(10552)		19	Bacterial invasion of epithelial cells(hsa05100)	Infectious Diseases/Human Diseases	ARPC1A(10552), ARPC2(10109), CAV1(857), CBLB(868), CLTCL1(8218), DNM1(1759), FN1(2335), ITGA5(3678), PIK3CD(5293), PIK3R3(8503)	0.0154
AKT1(207)		20	Melanoma(hsa05218)	Cancers/Human Diseases	AKT1(207), CDKN1A(1026), FGF1(2246), MITF(4286), PDGFB(5155), PDGFC(56034), PDGFRA(5156), PDGFRB(5159), PIK3CD(5293), PIK3R3(8503)	0.0156
CXCL12(6387)		21	Axon guidance(hsa04360)	Development/Organismal Systems	CXCL12(6387), DPYSL2(1808), EFNA4(1945), FYN(2534), NFATC4(4776), PAK3(5063), PLXNC1(10154), PPP3CB(5532), PPP3CC(5533), ROBO1(6091), ROCK1(6093), SEMA3B(7869), SLIT1(6585), SLIT2(9353), SLIT3(6586)	0.02
BMP2(650)		22	TGF-beta signaling pathway(hsa04350)	Signal Transduction/Environmental Information Processing	BMP2(650), COMP(1311), DCN(1634), ID3(3399), INHBA(3624), PPP2R1A(5518), ROCK1(6093), TGFBR2(7048), THBS2(7058), THBS4(7060), ZFYVE16(9765)	0.021
ATP6AP1(537)		23	Phagosome(hsa04145)	Transport and Catabolism/Cellular Processes	ATP6AP1(537), ATP6V0B(533), C1R(715), CD209(30835), COLEC11(78989), COLEC12(81035), COMP(1311), HLA-DPA1(3113), ITGA5(3678), ITGAV(3685), ITGB5(3693), MRC2(9902), MSR1(4481), PIKFYVE(200576), THBS2(7058), THBS4(7060), TUBB2B(347733)	0.0223809
GLS2(27165)		24	D-Glutamine and D-glutamate metabolism(hsa00471)	Metabolism of Other Amino Acids/Metabolism	GLS2(27165), GLS(2744)	0.0230694
AKT1(207)		25	Renal cell carcinoma(hsa05211)	Cancers/Human Diseases	AKT1(207), FLCN(201163), HIF1A(3091), PAK3(5063), PDGFB(5155), PGF(5228), PIK3CD(5293), PIK3R3(8503), VEGFC(7424)	0.035824
ALG6(29929)		26	N-Glycan biosynthesis(hsa00510)	Glycan Biosynthesis and Metabolism/Metabolism	ALG6(29929), B4GALT3(8703), DDOST(1650), DPAGT1(1798), GANAB(23193), MAN1A1(4121), TUSC3(7991)	0.0371104
ACTN1(87)		27	Tight junction(hsa04530)	Cell Communication/Cellular Processes	ACTN1(87), AKT1(207), CLDN3(1365), CLDN4(1364), CLDN5(7122), CLDN7(1366), F11R(50848), JAM2(58494), JAM3(83700), PARD3(56288), PPP2R1A(5518), SPTAN1(6709), TJP2(9414), TJP3(27134)	0.0460336
AKT1(207)		28	T cell receptor signaling pathway(hsa04660)	Immune System/Organismal Systems	AKT1(207), CBLB(868), CD8A(925), FYN(2534), LAT(27040), NFATC4(4776), PAK3(5063), PIK3CD(5293), PIK3R3(8503), PPP3CB(5532), PPP3CC(5533), ZAP70(7535)	0.0460639
AKT1(207)		29	mTOR signaling pathway(hsa04150)	Signal Transduction/Environmental Information Processing	AKT1(207), EIF4E(1977), HIF1A(3091), PGF(5228), PIK3CD(5293), PIK3R3(8503), VEGFC(7424)	0.0490373

## Sheet: Table S14
	Table S14: Significant pathways predicted from KEGG database in all LNN patients (both ER-positive and ER-negative combined)
		Map title	Category	Gene name	Fisher's exact P value
	1	Focal adhesion(hsa04510)	Cell Communication/Cellular Processes	ACTN1(87), ACTN4(81), AKT1(207), AKT3(10000), ARHGAP35(2909), BIRC2(329), CAV1(857), CAV2(858), CCND1(595), CCND2(894), COL11A1(1301), COL1A1(1277), COL1A2(1278), COL3A1(1281), COL4A1(1282), COL5A1(1289), COL5A2(1290), COL6A1(1291), COL6A2(1292), COL6A3(1293), COMP(1311), EGFR(1956), FIGF(2277), FLNC(2318), FLT1(2321), FN1(2335), FYN(2534), HGF(3082), IGF1(3479), IGF1R(3480), ITGA4(3676), ITGA5(3…	0
	2	ECM-receptor interaction(hsa04512)	Signaling Molecules and Interaction/Environmental Information Processing	CD44(960), CD47(961), COL11A1(1301), COL1A1(1277), COL1A2(1278), COL3A1(1281), COL4A1(1282), COL5A1(1289), COL5A2(1290), COL6A1(1291), COL6A2(1292), COL6A3(1293), COMP(1311), FN1(2335), HSPG2(3339), ITGA4(3676), ITGA5(3678), ITGAV(3685), ITGB1(3688), ITGB5(3693), ITGB6(3694), LAMA2(3908), LAMA4(3910), LAMB1(3912), LAMB2(3913), LAMC1(3915), RELN(5649), SDC2(6383), SDC4(6385), SV2B(9899), THBS2(705…	1e-08
	3	Pathways in cancer(hsa05200)	Cancers/Human Diseases	AKT1(207), AKT3(10000), AR(367), ARAF(369), BIRC2(329), BMP2(650), CBLB(868), CCND1(595), CDKN1A(1026), CDKN2A(1029), COL4A1(1282), DVL1(1855), DVL3(1857), EGFR(1956), EGLN2(112398), EPAS1(2034), FAS(355), FGF1(2246), FIGF(2277), FLT3LG(2323), FN1(2335), FOXO1(2308), FZD10(11211), FZD1(8321), FZD2(2535), FZD7(8324), GLI3(2737), HGF(3082), HIF1A(3091), HSP90AB1(3326), IGF1(3479), IGF1R(3480), IL6(…	8.785e-05
	4	Lysosome(hsa04142)	Transport and Catabolism/Cellular Processes	ACP5(54), AP1M2(10053), AP3B1(8546), AP3S1(1176), ASAH1(427), ATP6AP1(537), ATP6V0B(533), ATP6V0C(527), ATP6V0D1(9114), CLN3(1201), CLTCL1(8218), CTNS(1497), CTSB(1508), CTSG(1511), CTSK(1513), CTSL1(1514), DNASE2(1777), GAA(2548), GGA2(23062), GGA3(23163), GLB1(2720), GNPTAB(79158), GNS(2799), HEXB(3074), IDS(3423), IDUA(3425), LAMP1(3916), NAGLU(4669), NAPSA(9476), NEU1(4758), NPC1(4864), NPC2(…	0.00012126
	5	Acute myeloid leukemia(hsa05221)	Cancers/Human Diseases	AKT1(207), AKT3(10000), ARAF(369), CCND1(595), JUP(3728), KIT(3815), LEF1(51176), NFKB1(4790), PIK3CD(5293), PIK3R3(8503), PIM1(5292), PPARD(5467), RELA(5970), RUNX1(861), RUNX1T1(862), SOS1(6654), SOS2(6655), STAT3(6774), STAT5A(6776), TCF7(6932), TCF7L2(6934)	0.00016469
	6	Prostate cancer(hsa05215)	Cancers/Human Diseases	AKT1(207), AKT3(10000), AR(367), ARAF(369), CCND1(595), CDKN1A(1026), CREB1(1385), CREB3(10488), CREB3L4(148327), EGFR(1956), FOXO1(2308), HSP90AB1(3326), IGF1(3479), IGF1R(3480), LEF1(51176), NFKB1(4790), NFKBIA(4792), PDGFB(5155), PDGFC(56034), PDGFRA(5156), PDGFRB(5159), PIK3CD(5293), PIK3R3(8503), RELA(5970), SOS1(6654), SOS2(6655), TCF7(6932), TCF7L2(6934)	0.0002426
	7	TGF-beta signaling pathway(hsa04350)	Signal Transduction/Environmental Information Processing	ACVR1(90), ACVR2A(92), AMH(268), BMP2(650), BMPR1B(658), COMP(1311), CUL1(8454), DCN(1634), E2F4(1874), ID2(3398), ID3(3399), ID4(3400), INHBA(3624), INHBB(3625), LTBP1(4052), PPP2CA(5515), PPP2R1A(5518), ROCK1(6093), ROCK2(9475), SMAD2(4087), SMAD6(4091), SMURF2(64750), TFDP1(7027), TGFBR2(7048), THBS2(7058), THBS4(7060), ZFYVE16(9765)	0.00026145
	8	Leukocyte transendothelial migration(hsa04670)	Immune System/Organismal Systems	ACTN1(87), ACTN4(81), ARHGAP35(2909), CD99(4267), CDH5(1003), CLDN3(1365), CLDN4(1364), CLDN5(7122), CLDN7(1366), CLDN8(9073), CTNND1(1500), CXCL12(6387), CXCR4(7852), F11R(50848), GNAI1(2770), ITGA4(3676), ITGB1(3688), JAM2(58494), JAM3(83700), MAPK13(5603), MMP2(4313), MMP9(4318), MYL12A(10627), MYL12B(103910), OCLN(100506658), PECAM1(5175), PIK3CD(5293), PIK3R3(8503), ROCK1(6093), ROCK2(9475),…	0.00121223
	9	Phagosome(hsa04145)	Transport and Catabolism/Cellular Processes	ATP6AP1(537), ATP6V0B(533), ATP6V0C(527), ATP6V0D1(9114), ATP6V0E1(8992), ATP6V1C1(528), ATP6V1G1(9550), C1R(715), C3(718), CD209(30835), COLEC11(78989), COLEC12(81035), COMP(1311), CTSL1(1514), FCGR3A(2214), HGS(9146), HLA-DPA1(3113), HLA-E(3133), ITGA5(3678), ITGAV(3685), ITGB1(3688), ITGB5(3693), LAMP1(3916), MRC1(4360), MRC2(9902), MSR1(4481), PIKFYVE(200576), RAB5B(5869), SCARB1(949), SEC61A…	0.00132439
	10	Adherens junction(hsa04520)	Cell Communication/Cellular Processes	ACTN1(87), ACTN4(81), CSNK2A2(1459), CTNND1(1500), EGFR(1956), FYN(2534), IGF1R(3480), LEF1(51176), MET(4233), NLK(51701), PARD3(56288), PTPRB(5787), PTPRM(5797), PVRL2(5819), SMAD2(4087), SNAI2(6591), SORBS1(10580), TCF7(6932), TCF7L2(6934), TGFBR2(7048), WASF1(8936), WASF3(10810)	0.00204163
	11	Wnt signaling pathway(hsa04310)	Signal Transduction/Environmental Information Processing	CCND1(595), CCND2(894), CSNK2A2(1459), CUL1(8454), DVL1(1855), DVL3(1857), FRAT2(23401), FZD10(11211), FZD1(8321), FZD2(2535), FZD7(8324), JUN(3725), LEF1(51176), LRP6(4040), MMP7(4316), NFATC4(4776), NLK(51701), PLCB3(5331), PPARD(5467), PPP2CA(5515), PPP2R1A(5518), PPP2R5A(5525), PPP3CB(5532), PPP3CC(5533), PRKACB(5567), ROCK1(6093), ROCK2(9475), RUVBL1(8607), SENP2(59343), SFRP1(6422), SFRP4(6…	0.00280187
	12	Epithelial cell signaling in Helicobacter pylori infection(hsa05120)	Infectious Diseases/Human Diseases	ATP6AP1(537), ATP6V0B(533), ATP6V0C(527), ATP6V0D1(9114), ATP6V0E1(8992), ATP6V1C1(528), ATP6V1G1(9550), CCL5(6352), EGFR(1956), F11R(50848), JAM2(58494), JAM3(83700), JUN(3725), MAP2K4(6416), MAPK13(5603), MET(4233), NFKB1(4790), NFKBIA(4792), PTPRZ1(5803), RELA(5970)	0.00437038
	13	Amoebiasis(hsa05146)	Infectious Diseases/Human Diseases	ACTN1(87), ACTN4(81), CD1D(912), COL11A1(1301), COL1A1(1277), COL1A2(1278), COL3A1(1281), COL4A1(1282), COL5A1(1289), COL5A2(1290), CTSG(1511), FN1(2335), IL1R1(3554), IL1R2(7850), IL6(3569), LAMA2(3908), LAMA4(3910), LAMB1(3912), LAMB2(3913), LAMC1(3915), NFKB1(4790), PIK3CD(5293), PIK3R3(8503), PLCB3(5331), PRKACB(5567), RAB5B(5869), RELA(5970), SERPINB1(1992)	0.00469779
	14	Arrhythmogenic right ventricular cardiomyopathy (ARVC)(hsa05412)	Cardiovascular Diseases/Human Diseases	ACTN1(87), ACTN4(81), CACNA1D(776), CACNB1(782), CDH2(1000), DMD(1756), GJA1(2697), ITGA4(3676), ITGA5(3678), ITGAV(3685), ITGB1(3688), ITGB5(3693), ITGB6(3694), JUP(3728), LAMA2(3908), LEF1(51176), LMNA(4000), SGCB(6443), SGCD(6444), TCF7(6932), TCF7L2(6934)	0.00561034
	15	mTOR signaling pathway(hsa04150)	Signal Transduction/Environmental Information Processing	AKT1(207), AKT3(10000), EIF4B(1975), EIF4E2(9470), EIF4E(1977), FIGF(2277), HIF1A(3091), IGF1(3479), MLST8(64223), PGF(5228), PIK3CD(5293), PIK3R3(8503), RPS6KA3(6197), TSC2(7249), ULK1(8408), VEGFC(7424)	0.00640821
	16	Cell adhesion molecules (CAMs)(hsa04514)	Signaling Molecules and Interaction/Environmental Information Processing	CD40(958), CD8A(925), CD99(4267), CDH15(1013), CDH2(1000), CDH3(1001), CDH5(1003), CLDN3(1365), CLDN4(1364), CLDN5(7122), CLDN7(1366), CLDN8(9073), F11R(50848), HLA-DPA1(3113), HLA-E(3133), ICAM2(3384), ITGA4(3676), ITGAV(3685), ITGB1(3688), JAM2(58494), JAM3(83700), MPZL1(9019), NLGN4X(57502), OCLN(100506658), PECAM1(5175), PTPRM(5797), PVRL2(5819), SDC2(6383), SDC4(6385), SELE(6401), SELP(6403)…	0.00820757
	17	Ribosome(hsa03010)	Translation/Genetic Information Processing	FAU(2197), RPL14(9045), RPL15(6138), RPL17(6139), RPL22(6146), RPL23(9349), RPL24(6152), RPL27(6155), RPL31(6160), RPL32(6161), RPL34(6164), RPL36(25873), RPL37(6167), RPL38(6169), RPL4(6124), RPL5(6125), RPLP2(6181), RPS20(6224), RPS21(6227), RPS23(6228), RPS25(6230), RPS29(6235), RPSA(3921), RSL24D1(51187)	0.00997974
	18	Purine metabolism(hsa00230)	Nucleotide Metabolism/Metabolism	ADCY2(108), ADCY6(112), ADCY7(113), AK2(204), AK4(205), AMPD2(271), AMPD3(272), ENTPD1(953), ENTPD6(955), GART(2618), GMPR2(51292), GUCY1A3(2982), GUK1(2987), NME6(10201), NPR2(4882), NT5E(4907), PAPSS2(9060), PDE1A(5136), PDE4A(5141), PDE4B(5142), PDE4C(5143), PDE9A(5152), POLD2(5425), POLD3(10714), POLD4(57804), POLE3(54107), POLR1B(84172), POLR2C(5432), POLR2D(5433), POLR2E(5434), POLR2J2(2467…	0.0107718
	19	Complement and coagulation cascades(hsa04610)	Immune System/Organismal Systems	A2M(2), BDKRB2(624), C1R(715), C1S(716), C3(718), C7(730), CFD(1675), CFH(3075), CFI(3426), F13A1(2162), F2R(2149), F3(2152), PLAT(5327), PLAU(5328), PROS1(5627), SERPING1(710), TFPI(7035), THBD(7056), VWF(7450)	0.0115157
	20	Base excision repair(hsa03410)	Replication and Repair/Genetic Information Processing	HMGB1(3146), LIG3(3980), MPG(4350), PARP1(142), PARP3(10039), POLD2(5425), POLD3(10714), POLD4(57804), POLE3(54107), SMUG1(23583), TDG(6996)	0.0118592
	21	Malaria(hsa05144)	Infectious Diseases/Human Diseases	CD40(958), COMP(1311), DARC(2532), HGF(3082), IL6(3569), LRP1(4035), MET(4233), PECAM1(5175), SDC2(6383), SDC4(6385), SELE(6401), SELP(6403), THBS2(7058), THBS4(7060), VCAM1(7412)	0.0127108
	22	Renal cell carcinoma(hsa05211)	Cancers/Human Diseases	AKT1(207), AKT3(10000), ARAF(369), EGLN2(112398), EPAS1(2034), FIGF(2277), FLCN(201163), HGF(3082), HIF1A(3091), JUN(3725), MET(4233), PAK3(5063), PDGFB(5155), PGF(5228), PIK3CD(5293), PIK3R3(8503), SOS1(6654), SOS2(6655), VEGFC(7424)	0.0134775
	23	Gap junction(hsa04540)	Cell Communication/Cellular Processes	ADCY2(108), ADCY6(112), ADCY7(113), EGFR(1956), GJA1(2697), GNAI1(2770), GUCY1A3(2982), HTR2B(3357), ITPR2(3709), ITPR3(3710), LPAR1(1902), PDGFB(5155), PDGFC(56034), PDGFRA(5156), PDGFRB(5159), PLCB3(5331), PRKACB(5567), SOS1(6654), SOS2(6655), TUBA1A(7846), TUBA1C(84790), TUBB2B(347733), TUBB6(84617)	0.0147692
	24	D-Glutamine and D-glutamate metabolism(hsa00471)	Metabolism of Other Amino Acids/Metabolism	GLS2(27165), GLS(2744), GLUD2(2747)	0.0149279
	25	Melanoma(hsa05218)	Cancers/Human Diseases	AKT1(207), AKT3(10000), ARAF(369), CCND1(595), CDKN1A(1026), CDKN2A(1029), EGFR(1956), FGF1(2246), HGF(3082), IGF1(3479), IGF1R(3480), MET(4233), MITF(4286), PDGFB(5155), PDGFC(56034), PDGFRA(5156), PDGFRB(5159), PIK3CD(5293), PIK3R3(8503)	0.0156937
	26	Protein processing in endoplasmic reticulum(hsa04141)	Folding, Sorting and Degradation/Genetic Information Processing	AMFR(267), CAPN1(823), CKAP4(10970), CRYAB(1410), CUL1(8454), DDOST(1650), DNAJB1(3337), DNAJC10(54431), DNAJC1(64215), EDEM3(80267), EIF2AK1(27102), EIF2AK2(5610), ERP29(10961), GANAB(23193), HSP90AB1(3326), HSPA5(3309), HYOU1(10525), LMAN1(3998), LMAN2(10960), MAN1A1(4121), MAP3K5(4217), MOGS(7841), NSFL1C(55968), PDIA3(2923), PPP1R15A(23645), SAR1A(56681), SEC23A(10484), SEC23B(10483), SEC61A1…	0.0158951
	27	Endocytosis(hsa04144)	Transport and Catabolism/Cellular Processes	ADRB2(154), AGAP1(116987), ARAP3(64411), ARFGAP2(84364), CAV1(857), CAV2(858), CBLB(868), CHMP1B(57132), CHMP2B(25978), CLTCL1(8218), CXCR4(7852), DNM1(1759), DNM2(1785), DNM3(26052), EGFR(1956), EHD2(30846), EHD3(30845), ERBB3(2065), F2R(2149), FLT1(2321), FOLR2(2350), GIT2(9815), GRK5(2869), HGS(9146), HLA-E(3133), IGF1R(3480), KIT(3815), MET(4233), PARD3(56288), PDGFRA(5156), PIP5K1A(8394), PI…	0.0160437
	28	RNA polymerase(hsa03020)	Transcription/Genetic Information Processing	POLR1B(84172), POLR2C(5432), POLR2D(5433), POLR2E(5434), POLR2J2(246721), POLR2J3(548644), POLR2J(5439), POLR3E(55718), POLR3G(10622), POLR3K(51728)	0.016137
	29	Protein digestion and absorption(hsa04974)	Digestive System/Organismal Systems	ATP1B3(483), COL11A1(1301), COL14A1(7373), COL15A1(1306), COL18A1(80781), COL1A1(1277), COL1A2(1278), COL3A1(1281), COL4A1(1282), COL5A1(1289), COL5A2(1290), COL6A1(1291), COL6A2(1292), COL6A3(1293), CPA3(1359), DPP4(1803), KCNN4(3783), MME(4311), SLC1A5(6510), SLC36A1(206358), SLC7A9(11136)	0.0164412
	30	Tight junction(hsa04530)	Cell Communication/Cellular Processes	ACTN1(87), ACTN4(81), AKT1(207), AKT3(10000), CLDN3(1365), CLDN4(1364), CLDN5(7122), CLDN7(1366), CLDN8(9073), CSDA(8531), CSNK2A2(1459), CTTN(2017), EPB41L2(2037), F11R(50848), GNAI1(2770), JAM2(58494), JAM3(83700), LLGL2(3993), MAGI1(9223), MYH11(4629), MYL12A(10627), MYL12B(103910), OCLN(100506658), PARD3(56288), PPP2CA(5515), PPP2R1A(5518), PRKCD(5580), PRKCE(5581), SPTAN1(6709), TJP2(9414), …	0.0180574
	31	Prion diseases(hsa05020)	Neurodegenerative Diseases/Human Diseases	C7(730), CCL5(6352), EGR1(1958), FYN(2534), HSPA5(3309), IL6(3569), LAMC1(3915), NOTCH1(4851), PRKACB(5567), PRNP(5621), STIP1(10963)	0.0187996
	32	Hypertrophic cardiomyopathy (HCM)(hsa05410)	Cardiovascular Diseases/Human Diseases	CACNA1D(776), CACNB1(782), DMD(1756), IGF1(3479), IL6(3569), ITGA4(3676), ITGA5(3678), ITGAV(3685), ITGB1(3688), ITGB5(3693), ITGB6(3694), LAMA2(3908), LMNA(4000), PRKAB1(5564), PRKAG1(5571), PRKAG2(51422), SGCB(6443), SGCD(6444), TNNC1(7134), TPM1(7168), TPM2(7169)	0.0214978
	33	Glycosaminoglycan degradation(hsa00531)	Glycan Biosynthesis and Metabolism/Metabolism	GLB1(2720), GNS(2799), HEXB(3074), HYAL2(8692), IDS(3423), IDUA(3425), NAGLU(4669)	0.024181
	34	Basal cell carcinoma(hsa05217)	Cancers/Human Diseases	BMP2(650), DVL1(1855), DVL3(1857), FZD10(11211), FZD1(8321), FZD2(2535), FZD7(8324), GLI3(2737), LEF1(51176), PTCH1(5727), TCF7(6932), TCF7L2(6934), WNT2(7472), WNT5B(81029), WNT6(7475)	0.0253329
	35	Pyrimidine metabolism(hsa00240)	Nucleotide Metabolism/Metabolism	AK3(50808), DCTD(1635), DPYD(1806), ENTPD1(953), ENTPD6(955), NME6(10201), NT5E(4907), POLD2(5425), POLD3(10714), POLD4(57804), POLE3(54107), POLR1B(84172), POLR2C(5432), POLR2D(5433), POLR2E(5434), POLR2J2(246721), POLR2J3(548644), POLR2J(5439), POLR3E(55718), POLR3G(10622), POLR3K(51728), TK1(7083), TK2(7084), UPP1(7378)	0.0272143
	36	Fc gamma R-mediated phagocytosis(hsa04666)	Immune System/Organismal Systems	AKT1(207), AKT3(10000), AMPH(273), ARPC1A(10552), ARPC2(10109), DNM1(1759), DNM2(1785), DNM3(26052), FCGR3A(2214), GSN(2934), LAT(27040), MARCKSL1(65108), PIK3CD(5293), PIK3R3(8503), PIP5K1A(8394), PIP5K1C(23396), PPAP2B(8613), PPAP2C(8612), PRKCD(5580), PRKCE(5581), SPHK1(8877), WASF1(8936), WASF3(10810)	0.0274424
	37	Dilated cardiomyopathy (DCM)(hsa05414)	Cardiovascular Diseases/Human Diseases	ADCY2(108), ADCY6(112), ADCY7(113), CACNA1D(776), CACNB1(782), DMD(1756), IGF1(3479), ITGA4(3676), ITGA5(3678), ITGAV(3685), ITGB1(3688), ITGB5(3693), ITGB6(3694), LAMA2(3908), LMNA(4000), PLN(5350), PRKACB(5567), SGCB(6443), SGCD(6444), TNNC1(7134), TPM1(7168), TPM2(7169)	0.0276013
	38	Small cell lung cancer(hsa05222)	Cancers/Human Diseases	AKT1(207), AKT3(10000), BIRC2(329), CCND1(595), COL4A1(1282), FN1(2335), ITGAV(3685), ITGB1(3688), LAMA2(3908), LAMA4(3910), LAMB1(3912), LAMB2(3913), LAMC1(3915), NFKB1(4790), NFKBIA(4792), PIK3CD(5293), PIK3R3(8503), PTGS2(5743), RARB(5915), RELA(5970), RXRB(6257)	0.0276779
	39	Melanogenesis(hsa04916)	Endocrine System/Organismal Systems	ADCY2(108), ADCY6(112), ADCY7(113), CREB1(1385), CREB3(10488), CREB3L4(148327), DVL1(1855), DVL3(1857), EDN1(1906), FZD10(11211), FZD1(8321), FZD2(2535), FZD7(8324), GNAI1(2770), KIT(3815), LEF1(51176), MITF(4286), PLCB3(5331), PRKACB(5567), TCF7(6932), TCF7L2(6934), WNT2(7472), WNT5B(81029), WNT6(7475)	0.0304131
	40	Chronic myeloid leukemia(hsa05220)	Cancers/Human Diseases	AKT1(207), AKT3(10000), ARAF(369), CBLB(868), CCND1(595), CDKN1A(1026), CDKN2A(1029), MECOM(2122), NFKB1(4790), NFKBIA(4792), PIK3CD(5293), PIK3R3(8503), RELA(5970), RUNX1(861), SOS1(6654), SOS2(6655), STAT5A(6776), TGFBR2(7048)	0.040252
	41	Vibrio cholerae infection(hsa05110)	Infectious Diseases/Human Diseases	ARF1(375), ATP6AP1(537), ATP6V0B(533), ATP6V0C(527), ATP6V0D1(9114), ATP6V0E1(8992), ATP6V1C1(528), ATP6V1G1(9550), KDELR1(10945), KDELR3(11015), PRKACB(5567), SEC61A1(29927), SEC61A2(55176), TJP2(9414)	0.0450461

## Sheet: Table S15
	Table S15: Correlation of TWIST1 expression with known EMT markers measured on Affymetrix array in LNN/ER-positive samples (n = 221)
	TWIST1 (213943_at)	EMT Markers (Affy-probe)	Spearman correaltion (rs)	P-value
	TWIST1	TGFB1 (203085_s_at)	-0.185011	0.0059
	TWIST1	ACTA2 (200974_at)	0.419199	< 0.001
	TWIST1	SNAI1 (219480_at)	0.0366418	0.59
	TWIST1	SNAI2 (213139_at)	0.353677	< 0.001
	TWIST1	ZEB1 (212758_s_at)	0.342069	< 0.001
	TWIST1	ZEB2 (203603_s_at)	0.336824	< 0.001
	TWIST1	CDH1 (207173_x_at)	-0.13878	0.04
	TWIST1	VIM (201426_s_at)	0.28	< 0.001
